# Supplementary material
Source: PubMed Central journal article supplement (PMC556229)
Supplement: pnas_102_15_5334__2.pdf [file pnas_102_15_5334__2.pdf]

**Table 1. Data collection statistics**

|                                             | MMP12-NNGH                                                                    | MMP12-AHA-HR                                                                                 |
|---------------------------------------------|-------------------------------------------------------------------------------|----------------------------------------------------------------------------------------------|
| Space group                                 | P2(1)2(1)2                                                                    | C2                                                                                           |
| Cell dimensions                             | $a = 37.30$ $b = 62.63$ $c = 69.24$ Å<br>$\alpha = \beta = \gamma = 90^\circ$ | $a = 50.92$ $b = 59.59$ $c = 53.49$ Å<br>$\alpha = \gamma = 90^\circ$ $\beta = 115.14^\circ$ |
| Resolution, Å                               | 46.4-1.34                                                                     | 48.4-1.0                                                                                     |
| Total reflections                           | 223,414 (23,499)*                                                             | 263,803 (27,281)                                                                             |
| Unique reflections                          | 36,295 (4,889)                                                                | 70,833 (8,671)                                                                               |
| Overall completeness, %                     | 98.4 (92.6)                                                                   | 97.6 (84.9)                                                                                  |
| $R_{\text{sym}}$ , %                        | 5.7 (30.8)                                                                    | 5.7 (25.1)                                                                                   |
| Multiplicity                                | 6.2 (4.8)                                                                     | 3.7 (3.1)                                                                                    |
| $I/\sigma(I)$                               | 7.2 (2.3)                                                                     | 5.5 (2.7)                                                                                    |
| $B$ factor from Wilson plot, Å <sup>2</sup> | 16.39                                                                         | 6.63                                                                                         |

\*Numbers in parentheses refer to the high-resolution shell.
