# Supplementary material
Source: PubMed Central journal article supplement (PMC556229)
Supplement: pnas_102_15_5334__3.pdf [file pnas_102_15_5334__3.pdf]

**Table 2. Anisotropic refinement statistics**

|                                                               | MMP12-NNGH  | MMP12-AHA-HR                |
|---------------------------------------------------------------|-------------|-----------------------------|
| Resolution, Å                                                 | 46.4 – 1.3  | 14.0 – 1.0                  |
| Total reflections used                                        | 36,256      | 70,800                      |
| Reflections in working set                                    | 33,678      | 65,283                      |
| Reflections in test set, 8%                                   | 2,578       | 5,517                       |
| $R_{\text{cryst}} / R_{\text{free}}$ , %                      | 17.8 / 21.4 | 15.5 / 16.7                 |
| Protein atoms                                                 | 1,249       | 2,417 (including hydrogens) |
| Ligand atoms                                                  | 26          | 8 (including hydrogens)     |
| Water molecules                                               | 236         | 291                         |
| RMSD bonds, Å                                                 | 0.014       | 0.009                       |
| RMSD angles, °                                                | 1.66        | 1.3                         |
| Average <i>B</i> factor<br>(including ligand), Å <sup>2</sup> | 18.2        | 8.7                         |
