# Supplementary material
Source: PubMed Central journal article supplement (PMC556229)
Supplement: pnas_102_15_5334__4.pdf [file pnas_102_15_5334__4.pdf]

**Table 3.  $^1\text{H}$  and  $^{15}\text{N}$  chemical shifts for the MMP12-NNGH adduct (pH 7.2, 298K)**

| Residue | Chemical shifts (ppm) |      |               |              |               |               |                                 |
|---------|-----------------------|------|---------------|--------------|---------------|---------------|---------------------------------|
|         | N                     | HN   | H $^{\alpha}$ | H $^{\beta}$ | H $^{\gamma}$ | H $^{\delta}$ | Others                          |
| 105 M   |                       |      |               |              |               |               |                                 |
| 106 G   |                       |      |               |              |               |               |                                 |
| 107 P   |                       |      |               |              |               |               |                                 |
| 108 V   |                       |      |               |              |               |               | QG2 (0.39),                     |
| 109 W   |                       |      |               | (1.88)       |               |               | HD1 7.28, HE1 9.32              |
| 110 R   | 115.94                | 7.50 | 4.47          | (1.80)       | (1.30)        | (3.34)        |                                 |
| 111 K   |                       |      |               | 1.58, 2.03   | 1.14, 1.33    |               |                                 |
| 112 H   |                       | 6.88 | 4.08          | 2.77, 3.25   |               |               |                                 |
| 113 Y   | 120.29                | 6.93 | 4.73          | 2.67, 2.80   |               |               |                                 |
| 114 I   | 128.57                | 8.26 | 4.09          | 1.31         | 0.20, 0.69    | (0.07)        | QG2 (0.32)                      |
| 115 T   | 117.36                | 9.18 | 5.30          | 4.05         |               |               | QG2 (1.03)                      |
| 116 Y   | 117.42                | 8.59 | 5.78          | 2.29, 2.89   |               |               | CG (6.37), CZ (6.04), HH (6.61) |
| 117 R   | 119.17                | 8.35 | 4.61          | (1.53)       | (1.47)        | (2.90)        |                                 |
| 118 I   | 127.25                | 9.12 | 4.24          | 1.70         | 0.83, 1.68    | (0.93)        | QG2 (0.03)                      |
| 119 N   | 128.68                | 9.64 | 4.26          | 2.48, 3.03   |               |               | HD21 7.41, HD22 6.80            |
| 120 N   | 113.17                | 7.76 | 4.63          | 2.89, 2.98   |               |               | HD21 7.93, HD22 7.00            |
| 121 Y   | 115.09                | 8.56 | 4.00          | 2.50, 2.83   |               |               | QE (7.22), CG (7.33), CZ (6.84) |
| 122 T   | 115.79                | 8.07 | 4.86          | 3.10         | (2.62)        |               |                                 |
| 123 P   |                       |      | 4.02          | 2.00, 2.16   | (1.86)        | 3.53, 3.81    |                                 |
| 124 D   | 121.93                | 8.79 | 4.65          | 2.48, 2.67   |               |               |                                 |
| 125 M   | 113.37                | 6.90 | 4.54          | 1.32, 2.18   | (2.24)        |               | QE (0.34)                       |
| 126 N   | 118.79                | 8.85 | 4.64          | 2.77, 2.80   |               |               | HD21 7.60, HD22 6.93            |
| 127 R   | 126.15                | 8.92 | 3.67          | 1.31, 1.42   | (0.90)        | 2.55, 2.63    |                                 |
| 128 E   | 116.21                | 9.08 | 4.06          | (1.92)       | (2.26)        |               |                                 |
| 129 D   | 119.89                | 7.43 | 4.61          | 2.59, 2.79   |               |               |                                 |
| 130 V   | 124.05                | 7.73 | 3.39          | 2.59         | (0.95)        |               | QG2 (0.86)                      |
| 131 D   | 118.41                | 8.33 | 4.25          | 2.63, 2.70   |               |               |                                 |
| 132 Y   | 119.74                | 8.12 | 4.16          | 3.04, 3.20   |               |               | CG (7.12), CZ (6.67)            |
| 133 A   | 121.42                | 8.01 | 3.88          | (1.47)       |               |               |                                 |
| 134 I   | 113.97                | 8.02 | 3.47          | 2.10         | 1.02, 1.57    | (0.23)        | QG2 (0.72)                      |
| 135 R   | 119.79                | 8.24 | 4.08          | 1.96, 2.03   | 1.57, 1.72    | (3.25)        |                                 |
| 136 K   | 119.04                | 8.50 | 3.98          | (1.51)       | 0.86, 0.98    |               |                                 |
| 137 A   | 123.61                | 8.01 | 3.85          | (1.05)       |               |               |                                 |
| 138 F   | 114.37                | 7.74 | 3.69          | (2.52)       |               |               | CG (5.54), CZ (5.79)            |
| 139 Q   | 119.10                | 8.04 | 4.13          | (2.23)       | 2.40, 2.56    |               | HE21 7.56, HE22 6.94            |
| 140 V   | 117.31                | 7.60 | 3.55          | 2.09         | (1.09)        |               | QG2 (0.41)                      |
| 141 W   | 116.89                | 6.70 | 4.70          | 3.02, 3.04   |               |               | HD1 6.84, HE19.99               |
| 142 S   | 118.58                | 9.03 | 4.22          | 4.13, 4.27   |               |               |                                 |
| 143 N   | 115.33                | 7.91 | 4.66          | (2.92)       |               |               | HD21 7.56, HD22 6.94            |
| 144 V   | 106.51                | 7.12 | 4.76          | 2.60         | (0.85)        |               | QG2 (1.06)                      |
| 145 T   | 110.38                | 7.42 | 5.15          | 3.92         |               |               | QG2 (1.39)                      |
| 146 P   |                       |      | 4.23          |              |               | (3.47)        |                                 |
| 147 L   | 110.67                | 7.21 | 4.39          | 1.63, 2.02   | 1.43          | (0.69)        | QD2 (0.57)                      |
| 148 K   | 122.43                | 8.12 | 4.23          | 1.32, 1.57   | (1.50)        |               | QE (2.06)                       |
| 149 F   | 119.48                | 8.18 | 5.64          | 2.12, 2.45   |               |               | CG (6.84)                       |
| 150 S   | 116.71                | 8.03 | 4.58          | 3.37, 3.47   |               |               |                                 |
| 151 K   | 127.74                | 8.09 | 3.39          | 1.03, 1.35   | (0.68)        | (2.97)        |                                 |
| 152 I   | 123.89                | 8.72 | 4.65          | 1.82         | 0.84, 1.09    | (0.59)        | QG2 (0.70)                      |
| 153 N   | 119.47                | 8.77 | 4.72          | (2.78)       |               |               | HD21 7.85, HD22 6.64            |
| 154 T   | 111.76                | 7.43 | 4.38          | 4.04         |               |               | QG2 (1.07)                      |
| 155 G   | 109.98                | 8.28 | 3.46, 4.26    |              |               |               |                                 |
| 156 M   | 119.05                | 8.18 | 4.20          | (1.90)       | (2.46)        |               |                                 |
| 157 A   | 127.16                | 7.92 | 4.40          | (0.90)       |               |               |                                 |
| 158 D   | 121.49                | 7.99 | 4.48          | 2.21, 2.94   |               |               |                                 |
| 159 I   | 124.35                | 8.85 | 4.16          | 1.80         | (1.44)        | (1.05)        | QG2 (0.89)                      |
| 160 L   | 130.06                | 7.59 | 5.02          | 1.41, 1.62   |               | (0.92)        | QD2 (0.83)                      |
| 161 V   | 125.43                | 8.74 | 5.10          | 2.09         | (0.91)        |               | QG2 (0.83)                      |
| 162 V   | 127.05                | 8.79 | 4.51          | 1.74         | (0.71)        |               | QG2 (0.85)                      |
| 163 F   | 125.72                | 8.38 | 5.32          | 2.69, 2.97   |               |               | CG (6.88)                       |
| 164 A   | 125.99                | 9.10 | 4.77          | (0.94)       |               |               |                                 |

|     |   |        |       |            |             |            |            |                               |
|-----|---|--------|-------|------------|-------------|------------|------------|-------------------------------|
| 165 | R | 118.17 | 8.77  | 5.21       | 1.60, 1.84  | (1.52)     | (3.19)     |                               |
| 166 | G | 108.11 | 9.43  | 3.77, 3.88 |             |            |            |                               |
| 167 | A | 134.13 | 9.15  | 4.28       | (1.44)      |            |            |                               |
| 168 | H | 121.94 | 8.00  |            | (3.00)      |            |            |                               |
| 169 | G |        |       |            |             |            |            |                               |
| 170 | D |        |       |            |             |            |            |                               |
| 171 | D | 115.46 | 8.36  | 4.38       | (2.89)      |            |            |                               |
| 172 | H | 120.60 | 7.54  | 4.57       | 2.06, 2.48  |            |            | HD2 8.28, HE1 6.55            |
| 173 | A | 123.32 | 7.95  | 4.12       | (1.25)      |            |            |                               |
| 174 | F | 119.98 | 7.94  | 4.86       | (1.68)      |            |            | CG (6.73), CZ (7.15)          |
| 175 | D | 116.40 | 8.24  | 4.64       | 2.52, 3.04  |            |            |                               |
| 176 | G | 110.11 | 8.81  | 4.23, 4.40 |             |            |            |                               |
| 177 | K | 124.09 | 8.70  | 3.40       | (1.52)      | 0.92, 1.23 | (1.50)     | QE (2.84)                     |
| 178 | G | 121.24 | 10.75 | 3.50, 4.17 |             |            |            |                               |
| 179 | G | 110.72 | 8.44  | 3.36, 4.08 |             |            |            |                               |
| 180 | I | 129.77 | 10.61 | 3.88       | 2.07        | 1.36, 1.67 | (0.98)     | QG2 (1.20)                    |
| 181 | L | 128.22 | 8.45  | 4.39       | (1.34)      | 1.55       | (0.21)     | QD2 (-0.04)                   |
| 182 | A | 114.54 | 7.40  | 4.66       | (1.02)      |            |            |                               |
| 183 | H | 116.74 | 9.25  | 4.78       | 3.07, 3.27  |            |            | HD2 6.43, HE1 8.04            |
| 184 | A | 119.92 | 7.95  | 4.11       | (1.23)      |            |            |                               |
| 185 | F | 131.21 | 11.91 | 4.47       | (1.90)      |            |            | CG (6.97)                     |
| 186 | G | 105.40 | 8.18  | 3.46, 4.29 |             |            |            |                               |
| 187 | P |        |       | 4.48       | -0.12, 0.59 | 1.35, 1.63 | 2.79, 3.01 |                               |
| 188 | G | 106.91 | 5.65  | 3.59, 4.06 |             |            |            |                               |
| 189 | S | 108.19 | 7.34  | 4.55       |             |            |            |                               |
| 190 | G | 111.89 | 8.91  | 3.70, 3.92 |             |            |            |                               |
| 191 | I | 133.99 | 8.93  | 4.15       | 1.43        | 0.49, 0.92 | (0.36)     | QG2 (0.42)                    |
| 192 | G | 106.10 | 7.60  | 3.00, 3.72 |             |            |            |                               |
| 193 | G | 119.65 | 7.81  | 4.12, 4.56 |             |            |            |                               |
| 194 | D | 122.60 | 8.28  | 4.64       | (2.90)      |            |            |                               |
| 195 | A | 119.80 | 8.61  | 4.70       | (0.94)      |            |            |                               |
| 196 | H | 121.82 | 9.34  | 5.73       | 2.41, 3.20  |            |            | HD2 6.88, HE1 9.24            |
| 197 | F | 122.80 | 9.14  | 4.16       | 1.65, 2.01  |            |            | CG 6.23                       |
| 198 | D | 121.00 | 8.06  | 4.14       |             |            |            |                               |
| 199 | E | 120.40 | 8.03  | 4.84       | (2.95)      |            |            |                               |
| 200 | D | 122.63 | 8.13  | 4.33       | (2.66)      |            |            |                               |
| 201 | E | 130.71 | 9.40  | 4.27       | 1.64, 1.95  |            |            |                               |
| 202 | F | 119.41 | 9.02  | 4.72       | (2.50)      |            |            |                               |
| 203 | W | 116.82 | 7.37  | 4.37       | 0.55, 1.00  |            |            | HE1 10.15, HE3 7.12, HZ3 6.82 |
| 204 | T | 126.02 | 8.37  | 4.67       | 4.46        |            |            | QG2 (2.68)                    |
| 205 | T | 122.80 | 7.94  | 4.57       | 4.41        |            |            | QG2 (1.22)                    |
| 206 | H | 119.97 | 7.94  | 4.11       | 2.79, 3.03  |            |            | HD2 9.36, HE1 6.92            |
| 207 | S | 116.51 | 6.90  | 3.58       | 2.65, 3.30  |            |            |                               |
| 208 | G | 109.56 | 8.14  | 3.77, 4.08 |             |            |            |                               |
| 209 | G | 108.17 | 7.84  | (3.89)     |             |            |            |                               |
| 210 | T | 125.17 | 9.15  | 3.59       | 2.44        |            |            | QG2 (0.20)                    |
| 211 | N | 125.46 | 8.49  | 4.71       | (3.09)      |            |            | HD21 7.94, HD22 6.31          |
| 212 | L | 131.80 | 8.54  | 4.36       | 1.47, 1.80  | 1.01       | (0.75)     | QD2 (-0.20)                   |
| 213 | F | 120.30 | 9.20  | 3.85       | 3.09, 3.36  |            |            | CG (7.16), CZ (6.49)          |
| 214 | L | 118.35 | 8.84  | 3.07       | 1.51, 1.72  | 0.95       | (0.48)     |                               |
| 215 | T | 112.55 | 7.35  | 4.09       | 4.31        |            |            | QG2 (1.34)                    |
| 216 | A | 124.16 | 9.37  | 3.92       | (1.02)      |            |            |                               |
| 217 | V | 118.57 | 8.35  | 3.13       | 1.68        | (0.67)     |            | QG2 (0.08)                    |
| 218 | H | 118.15 | 6.99  | 4.35       | 3.07, 3.90  |            |            | HD2 9.86                      |
| 219 | E | 115.73 | 8.84  | 3.85       | (1.75)      | (1.43)     |            |                               |
| 220 | I | 117.99 | 8.95  | 3.43       | 1.30        | 0.20, 0.90 | (-0.46)    | QG2 (0.13)                    |
| 221 | G | 108.20 | 7.53  | 2.29, 3.79 |             |            |            |                               |
| 222 | H | 119.71 | 7.12  | 4.86       | 2.39, 3.73  |            |            | HD2 6.70, HE1 8.29            |
| 223 | S | 122.48 | 8.78  | 4.06       | (3.48)      |            |            |                               |
| 224 | L | 114.25 | 7.68  | 4.48       | (1.90)      | 1.55       | (0.74)     | QD2 (0.23)                    |

|     |   |        |       |            |            |            |            |                      |
|-----|---|--------|-------|------------|------------|------------|------------|----------------------|
| 225 | G | 106.68 | 8.13  | 3.33, 4.60 |            |            |            |                      |
| 226 | L | 120.95 | 8.37  | 4.73       | (1.41)     | 1.23       | (0.70)     | QD2 (0.23)           |
| 227 | G | 109.83 | 8.27  | 4.34, 4.60 |            |            |            |                      |
| 228 | H | 115.65 | 8.37  | 3.78       | 2.72, 2.91 |            |            | HD2 7.68, HE1 8.49   |
| 229 | S | 114.26 | 6.85  | 4.68       | 3.10, 4.16 |            |            |                      |
| 230 | S | 119.91 | 8.79  | 4.69       | 3.90, 4.01 |            |            |                      |
| 231 | D | 126.75 | 8.89  | 4.70       | 2.37, 2.96 |            |            |                      |
| 232 | P |        |       | 2.43       | (1.44)     |            | 3.66, 4.00 |                      |
| 233 | K | 116.71 | 8.18  | 4.05       | (1.70)     | 1.27, 1.35 | (2.42)     | QE (2.95)            |
| 234 | A | 123.87 | 8.13  | 4.52       | (1.72)     |            |            |                      |
| 235 | V | 131.43 | 11.47 | 4.35       | 2.36       | (0.02)     |            | QG2 (0.98)           |
| 236 | M | 115.47 | 7.62  | 4.53       | 2.13, 2.58 | (0.98)     |            | QE (0.47)            |
| 237 | F | 128.35 | 8.06  | 4.95       | 3.18, 3.66 |            |            | CG (7.22), CZ (6.10) |
| 238 | P |        |       | 3.83       |            |            |            |                      |
| 239 | T | 116.50 | 7.68  | 4.62       | 3.96       |            |            | QG2 (1.20)           |
| 240 | Y | 127.99 | 9.04  | 4.54       | 2.22, 2.67 |            |            | CG (6.72), CZ (7.41) |
| 241 | K | 129.94 | 7.90  | 3.90       | 1.53, 1.56 | (1.16)     | (1.55)     | QE (3.01)            |
| 242 | Y | 124.10 | 8.51  | 3.90       | 2.65, 2.98 |            |            | CG (6.82), CZ (9.04) |
| 243 | V | 124.38 | 5.75  | 3.77       | 1.80       | (0.79)     |            | QG2 (0.77)           |
| 244 | D | 119.10 | 7.81  | 4.17       | (2.66)     |            |            |                      |
| 245 | I | 124.41 | 7.73  | 3.76       | 1.83       | (1.14)     | (0.67)     | QG2 (1.04)           |
| 246 | N | 118.47 | 8.49  | 4.57       | 2.75, 2.88 |            |            | HD21 7.53, HD22 7.01 |
| 247 | T | 109.39 | 7.56  | 4.34       | 4.27       |            |            | QG2 (1.05)           |
| 248 | F | 123.31 | 7.18  | 4.10       | 2.81, 3.02 |            |            | CZ (6.48)            |
| 249 | R | 126.23 | 7.12  | 3.92       | 1.39, 1.60 | 1.35, 1.42 | 2.99, 3.08 |                      |
| 250 | L | 121.13 | 8.09  | 3.82       | 1.31, 1.40 | 1.32       | (0.70)     | QD2 (0.15)           |
| 251 | S | 118.27 | 8.89  | 4.46       | 3.82, 4.15 |            |            |                      |
| 252 | A | 123.58 | 8.78  | 4.00       | (1.40)     |            |            |                      |
| 253 | D | 117.66 | 8.21  | 4.25       | 2.43, 2.77 |            |            |                      |
| 254 | D | 118.79 | 7.40  | 4.67       | 2.71, 3.01 |            |            |                      |
| 255 | I | 118.91 | 7.91  | 3.66       | 1.67       | 0.74, 1.71 | (0.68)     | QG2 (0.89)           |
| 256 | R | 119.17 | 8.50  | 3.98       | 1.82, 1.87 | 1.55, 1.73 | (3.16)     |                      |
| 257 | G | 106.84 | 8.26  | 3.74, 3.96 |            |            |            |                      |
| 258 | I | 123.60 | 8.62  | 4.43       | 2.11       | 1.50, 1.72 | (0.85)     | QG2 (1.52)           |
| 259 | Q | 123.52 | 8.63  | 4.42       | 1.98, 2.20 | 2.74, 2.89 |            | HE21 8.29, HE22 7.69 |
| 260 | S | 115.51 | 7.89  | 4.21       | (3.96)     |            |            |                      |
| 261 | L | 119.13 | 6.93  | 4.06       | 0.77, 1.82 | 1.69       | (0.59)     | QD2 (0.58)           |
| 262 | Y | 109.54 | 8.16  |            |            |            |            | CG (7.24)            |
| 263 | G | 110.20 | 8.29  |            |            |            |            |                      |

The numbers in parentheses indicate resonances for which degeneracy is assumed among diastereotopic protons or methyl groups. CG and CZ are used for Phe and Tyr residues to indicate the pseudoatoms representing the pair of HD and HE ring protons, respectively, when no stereospecific assignment is available for them.
