# Supplementary material
Source: PubMed Central journal article supplement (PMC556229)
Supplement: pnas_102_15_5334__5.pdf [file pnas_102_15_5334__5.pdf]

**Table 4.  $^{13}\text{C}$  resonance assignments for the MMP12-NNGH adduct (pH 7.2, 298K)**

| Residue | $\text{C}^\alpha$ | $\text{C}^\beta$ | $\text{C}^\gamma$    | $\text{C}^\delta$ | $\text{C}^\epsilon$ |
|---------|-------------------|------------------|----------------------|-------------------|---------------------|
| 105 M   |                   |                  | □                    | □                 | □                   |
| 106 G   |                   |                  | □                    | □                 | □                   |
| 107 P   |                   |                  | □                    | □                 | □                   |
| 108 V   |                   |                  | □                    | □                 | □                   |
| 109 W   | 52.66             | 25.97            | □                    | □                 | □                   |
| 110 R   |                   |                  | □                    | □                 | □                   |
| 111 K   | 59.57             | 27.98            | □                    | □                 | □                   |
| 112 H   | 51.34             | 28.60            | □                    | □                 | □                   |
| 113 Y   | 53.93             | 35.52            | □                    | □                 | □                   |
| 114 I   | 56.17             | 37.48            | CG1 25.13, CG2 14.38 | CD1 10.18         | □                   |
| 115 T   | 55.86             | 69.84            | CG2 19.42            | □                 | □                   |
| 116 Y   | 52.34             | 40.53            | □                    | □                 | □                   |
| 117 R   | 51.70             | 32.68            | 26.25                | 39.61             | □                   |
| 118 I   | 58.70             | 33.96            | CG1 25.13, CG2 14.38 | CD1 10.67         | □                   |
| 119 N   | 53.67             | 39.00            | □                    | □                 | □                   |
| 120 N   | 49.26             | 36.12            | □                    | □                 | □                   |
| 121 Y   | 56.02             | 38.01            | □                    | □                 | □                   |
| 122 T   |                   |                  | □                    | □                 | □                   |
| 123 P   | 60.27             | 28.96            | □                    | 47.61             | □                   |
| 124 D   | 52.35             | 39.11            | □                    | □                 | □                   |
| 125 M   | 50.73             | 36.62            | 29.57                | □                 | □                   |
| 126 N   | 50.66             | 35.64            | □                    | □                 | □                   |
| 127 R   | 57.69             | 27.28            | 23.65                | 40.63             | □                   |
| 128 E   | 56.91             | 25.82            | 33.70                | □                 | □                   |
| 129 D   | 54.24             | 37.99            | □                    | □                 | □                   |
| 130 V   | 63.89             | 28.68            | CG2 18.79            | □                 | □                   |
| 131 D   | 55.29             | 37.69            | □                    | □                 | □                   |
| 132 Y   | 58.93             | 36.02            | □                    | □                 | □                   |
| 133 A   | 52.83             | 15.82            | □                    | □                 | □                   |
| 134 I   | 59.32             | 33.04            | CG2 16.24            | CD1 5.93          | □                   |
| 135 R   | 57.10             | 27.30            | 24.53                | 41.29             | □                   |
| 136 K   | 55.62             | 28.37            | 21.47                | 25.10             | 39.09               |
| 137 A   | 52.81             | 16.32            | □                    | □                 | □                   |
| 138 F   | 60.95             | 35.99            | □                    | □                 | □                   |
| 139 Q   | 55.79             | 25.75            | 31.49                | □                 | □                   |
| 140 V   | 63.42             | 28.47            | CG1 20.33, CG2 18.45 | □                 | □                   |
| 141 W   | 55.79             | 27.70            | □                    | □                 | □                   |
| 142 S   | 58.72             | 60.82            | □                    | □                 | □                   |
| 143 N   | 52.20             | 36.19            | □                    | □                 | □                   |
| 144 V   | 57.64             | 29.99            | CG1 18.83, CG2 16.59 | □                 | □                   |
| 145 T   | 57.18             | 69.58            | CG2 21.83            | □                 | □                   |
| 146 P   | 60.66             | 29.67            | □                    | □                 | □                   |
| 147 L   | 51.94             | 40.16            | □                    | □                 | □                   |
| 148 K   | 52.45             | 32.33            | □                    | □                 | □                   |
| 149 F   | 52.81             | 39.02            | □                    | □                 | □                   |
| 150 S   | 53.96             | 63.00            | □                    | □                 | □                   |
| 151 K   | 52.46             | 30.66            | 22.87                | □                 | □                   |
| 152 I   | 56.16             | 38.09            | CG1 23.34, CG2 14.65 | CD1 10.13         | □                   |
| 153 N   | 50.83             | 37.21            | □                    | □                 | □                   |
| 154 T   | 57.61             | 68.20            | CG2 12.06            | □                 | □                   |
| 155 G   | 41.47             |                  | □                    | □                 | □                   |
| 156 M   | 52.48             | 29.14            | □                    | □                 | □                   |
| 157 A   | 46.85             | 19.74            | □                    | □                 | □                   |
| 158 D   | 55.08             | 38.62            | □                    | □                 | □                   |
| 159 I   | 58.89             | 37.51            | CG1 23.83            | CD1 11.79         | □                   |
| 160 L   | 50.55             | 40.82            | □                    | CD1 21.46         | □                   |
| 161 V   | 59.10             | 30.17            | CG1 17.71, CG2 17.32 | □                 | □                   |
| 162 V   | 58.15             | 34.54            | CG1 18.09, CG2 18.45 | □                 | □                   |
| 163 F   | 54.20             | 38.09            | □                    | □                 | □                   |
| 164 A   | 48.43             | 20.28            | □                    | □                 | □                   |

|     |   |       |       |                          |                          |                          |
|-----|---|-------|-------|--------------------------|--------------------------|--------------------------|
| 165 | R | 51.07 | 31.23 | <input type="checkbox"/> | <input type="checkbox"/> | <input type="checkbox"/> |
| 166 | G | 43.82 |       | <input type="checkbox"/> | <input type="checkbox"/> | <input type="checkbox"/> |
| 167 | A | 50.48 | 15.26 | <input type="checkbox"/> | <input type="checkbox"/> | <input type="checkbox"/> |
| 168 | H |       |       | <input type="checkbox"/> | <input type="checkbox"/> | <input type="checkbox"/> |
| 169 | G |       |       | <input type="checkbox"/> | <input type="checkbox"/> | <input type="checkbox"/> |
| 170 | D | 59.17 |       | <input type="checkbox"/> | <input type="checkbox"/> | <input type="checkbox"/> |
| 171 | D | 51.54 | 38.50 | <input type="checkbox"/> | <input type="checkbox"/> | <input type="checkbox"/> |
| 172 | H | 50.93 | 27.33 | <input type="checkbox"/> | <input type="checkbox"/> | <input type="checkbox"/> |
| 173 | A |       | 15.62 | <input type="checkbox"/> | <input type="checkbox"/> | <input type="checkbox"/> |
| 174 | F | 54.66 | 36.03 | <input type="checkbox"/> | <input type="checkbox"/> | <input type="checkbox"/> |
| 175 | D | 50.96 | 38.95 | <input type="checkbox"/> | <input type="checkbox"/> | <input type="checkbox"/> |
| 176 | G | 41.01 |       | <input type="checkbox"/> | <input type="checkbox"/> | <input type="checkbox"/> |
| 177 | K | 55.75 | 29.38 | 21.71                    | 26.15                    | 39.64                    |
| 178 | G | 40.23 |       | <input type="checkbox"/> | <input type="checkbox"/> | <input type="checkbox"/> |
| 179 | G | 43.72 |       | <input type="checkbox"/> | <input type="checkbox"/> | <input type="checkbox"/> |
| 180 | I | 59.47 | 35.29 | CG1 25.40, CG2 15.86     | CD1 9.79                 | <input type="checkbox"/> |
| 181 | L | 52.81 | 41.18 | 23.30                    | CD1 18.32, CD2 21.77     | <input type="checkbox"/> |
| 182 | A | 48.91 | 19.39 | <input type="checkbox"/> | <input type="checkbox"/> | <input type="checkbox"/> |
| 183 | H | 51.61 | 28.13 | <input type="checkbox"/> | <input type="checkbox"/> | <input type="checkbox"/> |
| 184 | A | 50.85 |       | <input type="checkbox"/> | <input type="checkbox"/> | <input type="checkbox"/> |
| 185 | F | 51.85 | 31.15 | <input type="checkbox"/> | <input type="checkbox"/> | <input type="checkbox"/> |
| 186 | G | 41.71 |       | <input type="checkbox"/> | <input type="checkbox"/> | <input type="checkbox"/> |
| 187 | P | 61.29 | 29.08 | <input type="checkbox"/> | <input type="checkbox"/> | <input type="checkbox"/> |
| 188 | G | 41.48 |       | <input type="checkbox"/> | <input type="checkbox"/> | <input type="checkbox"/> |
| 189 | S | 55.91 | 61.71 | <input type="checkbox"/> | <input type="checkbox"/> | <input type="checkbox"/> |
| 190 | G | 44.49 |       | <input type="checkbox"/> | <input type="checkbox"/> | <input type="checkbox"/> |
| 191 | I | 59.19 | 35.28 | CG1 25.40, CG2 13.69     | CD1 11.76                | <input type="checkbox"/> |
| 192 | G | 44.02 |       | <input type="checkbox"/> | <input type="checkbox"/> | <input type="checkbox"/> |
| 193 | G | 43.88 |       | <input type="checkbox"/> | <input type="checkbox"/> | <input type="checkbox"/> |
| 194 | D | 53.58 | 37.03 | <input type="checkbox"/> | <input type="checkbox"/> | <input type="checkbox"/> |
| 195 | A | 48.10 | 18.41 | <input type="checkbox"/> | <input type="checkbox"/> | <input type="checkbox"/> |
| 196 | H | 47.97 | 31.02 | <input type="checkbox"/> | <input type="checkbox"/> | <input type="checkbox"/> |
| 197 | F | 54.05 | 38.25 | <input type="checkbox"/> | <input type="checkbox"/> | <input type="checkbox"/> |
| 198 | D |       |       | <input type="checkbox"/> | <input type="checkbox"/> | <input type="checkbox"/> |
| 199 | E |       |       | <input type="checkbox"/> | <input type="checkbox"/> | <input type="checkbox"/> |
| 200 | D | 51.37 | 37.58 | <input type="checkbox"/> | <input type="checkbox"/> | <input type="checkbox"/> |
| 201 | E | 53.36 | 28.71 | <input type="checkbox"/> | <input type="checkbox"/> | <input type="checkbox"/> |
| 202 | F | 53.99 | 36.64 | <input type="checkbox"/> | <input type="checkbox"/> | <input type="checkbox"/> |
| 203 | W | 51.00 | 23.25 | <input type="checkbox"/> | <input type="checkbox"/> | <input type="checkbox"/> |
| 204 | T |       |       | <input type="checkbox"/> | <input type="checkbox"/> | <input type="checkbox"/> |
| 205 | T | 50.94 | 66.57 | <input type="checkbox"/> | <input type="checkbox"/> | <input type="checkbox"/> |
| 206 | H | 59.49 | 28.16 | <input type="checkbox"/> | <input type="checkbox"/> | <input type="checkbox"/> |
| 207 | S | 55.63 | 60.66 | <input type="checkbox"/> | <input type="checkbox"/> | <input type="checkbox"/> |
| 208 | G | 42.23 |       | <input type="checkbox"/> | <input type="checkbox"/> | <input type="checkbox"/> |
| 209 | G | 43.13 |       | <input type="checkbox"/> | <input type="checkbox"/> | <input type="checkbox"/> |
| 210 | T | 59.83 | 65.84 | CG2 21.80                | <input type="checkbox"/> | <input type="checkbox"/> |
| 211 | N | 52.76 | 39.01 | <input type="checkbox"/> | <input type="checkbox"/> | <input type="checkbox"/> |
| 212 | L | 56.01 | 38.58 | 25.02                    | CD1 25.06, CD2 19.61     | <input type="checkbox"/> |
| 213 | F | 59.03 | 35.06 | <input type="checkbox"/> | <input type="checkbox"/> | <input type="checkbox"/> |
| 214 | L | 55.22 | 40.32 | 23.50                    | CD1 21.15                | <input type="checkbox"/> |
| 215 | T | 64.00 | 65.56 | CG2 19.62                | <input type="checkbox"/> | <input type="checkbox"/> |
| 216 | A | 52.98 | 14.60 | <input type="checkbox"/> | <input type="checkbox"/> | <input type="checkbox"/> |
| 217 | V | 65.59 | 28.43 | CG1 20.86, CG2 20.59     | <input type="checkbox"/> | <input type="checkbox"/> |
| 218 | H | 56.10 | 26.00 | <input type="checkbox"/> | <input type="checkbox"/> | <input type="checkbox"/> |
| 219 | E | 56.13 | 25.91 | 30.64                    | <input type="checkbox"/> | <input type="checkbox"/> |
| 220 | I | 60.86 | 34.54 | CG1 26.43, CG2 16.52     | CD1 9.51                 | <input type="checkbox"/> |
| 221 | G | 45.54 |       | <input type="checkbox"/> | <input type="checkbox"/> | <input type="checkbox"/> |
| 222 | H | 54.99 | 25.58 | <input type="checkbox"/> | <input type="checkbox"/> | <input type="checkbox"/> |
| 223 | S | 53.36 | 60.32 | <input type="checkbox"/> | <input type="checkbox"/> | <input type="checkbox"/> |
| 224 | L | 53.73 | 27.81 | <input type="checkbox"/> | <input type="checkbox"/> | <input type="checkbox"/> |

|     |   |       |       |                          |                          |                          |
|-----|---|-------|-------|--------------------------|--------------------------|--------------------------|
| 225 | G |       |       | <input type="checkbox"/> | <input type="checkbox"/> | <input type="checkbox"/> |
| 226 | L |       |       | <input type="checkbox"/> | <input type="checkbox"/> | <input type="checkbox"/> |
| 227 | G |       |       | <input type="checkbox"/> | <input type="checkbox"/> | <input type="checkbox"/> |
| 228 | H | 52.37 | 26.94 | <input type="checkbox"/> | <input type="checkbox"/> | <input type="checkbox"/> |
| 229 | S | 52.42 | 62.51 | <input type="checkbox"/> | <input type="checkbox"/> | <input type="checkbox"/> |
| 230 | S | 55.81 | 61.37 | <input type="checkbox"/> | <input type="checkbox"/> | <input type="checkbox"/> |
| 231 | D |       | 39.29 | <input type="checkbox"/> | <input type="checkbox"/> | <input type="checkbox"/> |
| 232 | P | 60.18 | 29.28 | <input type="checkbox"/> | 47.95                    | <input type="checkbox"/> |
| 233 | K | 53.57 | 29.22 | 22.2                     | <input type="checkbox"/> | <input type="checkbox"/> |
| 234 | A | 49.10 | 16.95 | <input type="checkbox"/> | <input type="checkbox"/> | <input type="checkbox"/> |
| 235 | V | 62.08 | 28.47 | CG1 19.89, CG2 18.01     | <input type="checkbox"/> | <input type="checkbox"/> |
| 236 | M | 50.76 | 24.67 | <input type="checkbox"/> | <input type="checkbox"/> | <input type="checkbox"/> |
| 237 | F | 53.87 | 37.26 | <input type="checkbox"/> | <input type="checkbox"/> | <input type="checkbox"/> |
| 238 | P | 61.16 | 24.74 | <input type="checkbox"/> | <input type="checkbox"/> | <input type="checkbox"/> |
| 239 | T | 59.26 | 69.14 | CG2 19.20                | <input type="checkbox"/> | <input type="checkbox"/> |
| 240 | Y | 56.00 | 36.26 | <input type="checkbox"/> | <input type="checkbox"/> | <input type="checkbox"/> |
| 241 | K | 52.77 | 32.02 | <input type="checkbox"/> | <input type="checkbox"/> | <input type="checkbox"/> |
| 242 | Y | 58.26 | 35.66 | <input type="checkbox"/> | <input type="checkbox"/> | <input type="checkbox"/> |
| 243 | V | 56.55 | 32.47 | CG1 18.47, CG2 16.91     | <input type="checkbox"/> | <input type="checkbox"/> |
| 244 | D | 52.37 | 39.21 | <input type="checkbox"/> | <input type="checkbox"/> | <input type="checkbox"/> |
| 245 | I | 61.75 | 34.90 | CG1 24.42, CG2 15.11     | CD1 10.85                | <input type="checkbox"/> |
| 246 | N | 52.78 | 35.62 | <input type="checkbox"/> | <input type="checkbox"/> | <input type="checkbox"/> |
| 247 | T | 58.26 | 66.71 | <input type="checkbox"/> | <input type="checkbox"/> | <input type="checkbox"/> |
| 248 | F | 57.11 | 37.26 | <input type="checkbox"/> | <input type="checkbox"/> | <input type="checkbox"/> |
| 249 | R | 51.40 | 30.69 | 23.31                    | 40.78                    | <input type="checkbox"/> |
| 250 | L | 52.07 | 40.31 | <input type="checkbox"/> | <input type="checkbox"/> | <input type="checkbox"/> |
| 251 | S | 54.96 | 63.21 | <input type="checkbox"/> | <input type="checkbox"/> | <input type="checkbox"/> |
| 252 | A | 52.83 | 15.12 | <input type="checkbox"/> | <input type="checkbox"/> | <input type="checkbox"/> |
| 253 | D | 55.43 | 41.24 | <input type="checkbox"/> | <input type="checkbox"/> | <input type="checkbox"/> |
| 254 | D | 54.99 | 41.56 | <input type="checkbox"/> | <input type="checkbox"/> | <input type="checkbox"/> |
| 255 | I | 62.85 | 35.64 | CG1 27.89, CG2 14.33     | CD1 10.32                | <input type="checkbox"/> |
| 256 | R | 56.52 | 27.34 | 24.41                    | 40.68                    | <input type="checkbox"/> |
| 257 | G | 44.81 |       | <input type="checkbox"/> | <input type="checkbox"/> | <input type="checkbox"/> |
| 258 | I | 58.20 | 36.00 | CG2 18.02                | CD1 12.23                | <input type="checkbox"/> |
| 259 | Q | 55.94 | 24.48 | 32.35                    | <input type="checkbox"/> | <input type="checkbox"/> |
| 260 | S | 58.59 | 60.15 | <input type="checkbox"/> | <input type="checkbox"/> | <input type="checkbox"/> |
| 261 | L | 53.83 | 40.85 | <input type="checkbox"/> | CD2 19.20                | <input type="checkbox"/> |
| 262 | Y |       |       | <input type="checkbox"/> | <input type="checkbox"/> | <input type="checkbox"/> |
| 263 | G |       |       | <input type="checkbox"/> | <input type="checkbox"/> | <input type="checkbox"/> |
