# Supplementary material
Source: PubMed Central journal article supplement (PMC556229)
Supplement: pnas_102_15_5334__6.pdf [file pnas_102_15_5334__6.pdf]

**Table 5.  $\phi$  torsion angle restraints used in the solution structure calculations**

| Residue  | Range of $\phi$ |       | Residue  | Range of $\phi$ |        | Residue  | Range of $\phi$ |       |
|----------|-----------------|-------|----------|-----------------|--------|----------|-----------------|-------|
|          | From            | To    |          | From            | To     |          | From            | To    |
| 113 TYR  | -155.0          | -80.0 | 159 ILE  | -155.0          | -80.0  | 205 THR  | -80.0           | -30.0 |
| 114 ILE  | -155.0          | -80.0 | 160 LEU  | -155.0          | -80.0  | 207 SER  | -80.0           | -30.0 |
| 115 THR  | -155.0          | -80.0 | 161 VAL  | -155.0          | -80.0  | 210 THR  | -170.0          | -95.0 |
| 116 TYR  | -155.0          | -80.0 | 162 VAL  | -155.0          | -80.0  | 212 LEU  | -80.0           | -30.0 |
| 117 ARG+ | -155.0          | -80.0 | 163 PHE  | -155.0          | -80.0  | 215 THR  | -80.0           | -30.0 |
| 118 ILE  | -155.0          | -80.0 | 164 ALA  | -155.0          | -80.0  | 216 ALA  | -80.0           | -30.0 |
| 120 ASN  | -155.0          | -80.0 | 165 ARG+ | -155.0          | -80.0  | 217 VAL  | -80.0           | -30.0 |
| 121 TYR  | -155.0          | -80.0 | 167 ALA  | -155.0          | -80.0  | 226 LEU  | -155.0          | -80.0 |
| 125 MET  | -155.0          | -80.0 | 171 ASP- | -80.0           | -30.0  | 229 SER  | -155.0          | -80.0 |
| 126 ASN  | -125.0          | -50.0 | 174 PHE  | -165.0          | -90.0  | 231 ASP- | -155.0          | -80.0 |
| 127 ARG+ | -80.0           | -30.0 | 180 ILE  | -155.0          | -80.0  | 233 LYS+ | -80.0           | -30.0 |
| 130 VAL  | -80.0           | -30.0 | 181 LEU  | -80.0           | -30.0  | 234 ALA  | -130.0          | -55.0 |
| 131 ASP- | -80.0           | -30.0 | 182 ALA  | -180.0          | -105.0 | 236 MET  | -80.0           | -30.0 |
| 134 ILE  | -80.0           | -30.0 | 183 HIS  | -180.0          | -105.0 | 237 PHE  | -125.0          | -50.0 |
| 135 ARG+ | -80.0           | -30.0 | 184 ALA  | -160.0          | -85.0  | 239 THR  | -155.0          | -80.0 |
| 138 PHE  | -80.0           | -30.0 | 185 PHE  | -160.0          | -85.0  | 240 TYR  | -155.0          | -80.0 |
| 143 ASN  | -100.0          | -50.0 | 189 SER  | -155.0          | -80.0  | 241 LYS+ | -155.0          | -80.0 |
| 144 VAL  | -85.0           | -35.0 | 191 ILE  | -110.0          | -60.0  | 243 VAL  | -155.0          | -80.0 |
| 145 THR  | -155.0          | -80.0 | 194 ASP- | -130.0          | -55.0  | 247 THR  | -80.0           | -30.0 |
| 147 LEU  | -135.0          | -60.0 | 195 ALA  | -155.0          | -80.0  | 249 ARG+ | -160.0          | -85.0 |
| 149 PHE  | -140.0          | -65.0 | 197 PHE  | -155.0          | -80.0  | 250 LEU  | -160.0          | -85.0 |
| 150 SER  | -155.0          | -80.0 | 199 GLU- | -80.0           | -30.0  | 251 SER  | -155.0          | -80.0 |
| 151 LYS+ | -155.0          | -80.0 | 200 ASP- | -80.0           | -30.0  | 253 ASP- | -80.0           | -30.0 |
| 152 ILE  | -155.0          | -80.0 | 201 GLU- | -150.0          | -75.0  | 254 ASP- | -110.0          | -60.0 |
| 154 THR  | -155.0          | -80.0 | 202 PHE  | -155.0          | -80.0  | 255 ILE  | -80.0           | -30.0 |
| 156 MET  | -155.0          | -80.0 | 203 TRP  | -155.0          | -80.0  | 258 ILE  | -70.0           | -20.0 |
| 157 ALA  | -155.0          | -80.0 | 204 THR  | -155.0          | -80.0  | 260 SER  | -80.0           | -30.0 |
