# Supplementary material
Source: PubMed Central journal article supplement (PMC556229)
Supplement: pnas_102_15_5334__7.pdf [file pnas_102_15_5334__7.pdf]

**Table 6.  $\psi$  torsion angle restraints used in the solution structure calculations**

| Residue  | Range of $\psi$ |       | Residue  | Range of $\psi$ |       | Residue  | Range of $\psi$ |       |
|----------|-----------------|-------|----------|-----------------|-------|----------|-----------------|-------|
|          | From            | To    |          | From            | To    |          | From            | To    |
| 107 PRO  | 80.0            | 180.0 | 157 ALA  | 80.0            | 180.0 | 207 SER  | -65.0           | -20.0 |
| 113 TYR  | 80.0            | 180.0 | 159 ILE  | 80.0            | 180.0 | 210 THR  | 80.0            | 180.0 |
| 114 ILE  | 80.0            | 180.0 | 160 LEU  | 80.0            | 180.0 | 212 LEU  | -65.0           | -20.0 |
| 115 THR  | 80.0            | 180.0 | 161 VAL  | 80.0            | 180.0 | 215 THR  | -65.0           | -20.0 |
| 116 TYR  | 80.0            | 180.0 | 162 VAL  | 80.0            | 180.0 | 216 ALA  | -65.0           | -20.0 |
| 117 ARG+ | 80.0            | 180.0 | 163 PHE  | 80.0            | 180.0 | 217 VAL  | -65.0           | -20.0 |
| 118 ILE  | 80.0            | 180.0 | 164 ALA  | 100.0           | 190.0 | 226 LEU  | 80.0            | 180.0 |
| 120 ASN  | 80.0            | 180.0 | 165 ARG+ | 70.0            | 170.0 | 229 SER  | 80.0            | 180.0 |
| 121 TYR  | 90.0            | 190.0 | 167 ALA  | 80.0            | 180.0 | 231 ASP- | 80.0            | 180.0 |
| 123 PRO  | -65.0           | -20.0 | 171 ASP- | -65.0           | -20.0 | 232 PRO  | -55.0           | 0.0   |
| 125 MET  | 100.0           | 190.0 | 174 PHE  | 80.0            | 180.0 | 233 LYS+ | -70.0           | -25.0 |
| 126 ASN  | 70.0            | 160.0 | 180 ILE  | 70.0            | 170.0 | 234 ALA  | 80.0            | 180.0 |
| 127 ARG+ | -65.0           | -20.0 | 181 LEU  | -65.0           | -20.0 | 236 MET  | -60.0           | -15.0 |
| 130 VAL  | -65.0           | -20.0 | 182 ALA  | 80.0            | 180.0 | 237 PHE  | 80.0            | 180.0 |
| 131 ASP- | -65.0           | -20.0 | 184 ALA  | 80.0            | 180.0 | 238 PRO  | -55.0           | 0.0   |
| 134 ILE  | -65.0           | -20.0 | 185 PHE  | 80.0            | 180.0 | 239 THR  | 80.0            | 180.0 |
| 135 ARG+ | -65.0           | -20.0 | 187 PRO  | 80.0            | 180.0 | 240 TYR  | 80.0            | 180.0 |
| 138 PHE  | -60.0           | -10.0 | 189 SER  | 80.0            | 180.0 | 241 LYS+ | 80.0            | 180.0 |
| 143 ASN  | -65.0           | -20.0 | 191 ILE  | -40.0           | 15.0  | 243 VAL  | 80.0            | 180.0 |
| 144 VAL  | -70.0           | -25.0 | 194 ASP- | 80.0            | 180.0 | 247 THR  | -65.0           | -20.0 |
| 145 THR  | 80.0            | 180.0 | 195 ALA  | 80.0            | 180.0 | 249 ARG+ | 90.0            | 190.0 |
| 146 PRO  | -45.0           | 10.0  | 197 PHE  | 80.0            | 180.0 | 250 LEU  | 80.0            | 180.0 |
| 147 LEU  | 80.0            | 180.0 | 199 GLU- | -55.0           | -10.0 | 251 SER  | 70.0            | 170.0 |
| 149 PHE  | 80.0            | 180.0 | 200 ASP- | -65.0           | -20.0 | 253 ASP- | -65.0           | -20.0 |
| 150 SER  | 80.0            | 180.0 | 201 GLU- | 80.0            | 180.0 | 254 ASP- | -65.0           | -20.0 |
| 151 LYS+ | 80.0            | 180.0 | 202 PHE  | 80.0            | 180.0 | 255 ILE  | -55.0           | -10.0 |
| 152 ILE  | 80.0            | 180.0 | 203 TRP  | 80.0            | 180.0 | 258 ILE  | -65.0           | -20.0 |
| 154 THR  | 80.0            | 180.0 | 204 THR  | 80.0            | 180.0 | 260 SER  | -65.0           | -20.0 |
| 156 MET  | 80.0            | 180.0 | 205 THR  | -65.0           | -20.0 | □        | □               | □     |
