# Supplementary material
Source: PubMed Central journal article supplement (PMC556229)
Supplement: pnas_102_15_5334__8.pdf [file pnas_102_15_5334__8.pdf]

**Table 7. Upper distance limits obtained from intramolecule and intermolecule NOEs involving the inhibitor NNGH (indicated as 364 NGH)**

| Residue 1 | Atom 1 | Residue 2 | Atom 2 | Upper limit, Å |
|-----------|--------|-----------|--------|----------------|
| 180 ILE   | HN     | 364 NGH   | QA     | 7.4            |
| 180 ILE   | HB     | 364 NGH   | QB     | 6.9            |
| 180 ILE   | HG13   | 364 NGH   | QA     | 6.1            |
| 180 ILE   | QD1    | 364 NGH   | HG     | 3.4            |
| 181 LEU   | HN     | 364 NGH   | QQD    | 7.0            |
| 181 LEU   | QB     | 364 NGH   | QP2    | 5.1            |
| 181 LEU   | QB     | 364 NGH   | QP3    | 5.9            |
| 181 LEU   | HG     | 364 NGH   | QP3    | 6.4            |
| 183 HIS   | HN     | 364 NGH   | QA     | 7.0            |
| 184 ALA   | HN     | 364 NGH   | HNA    | 4.9            |
| 218 HIS   | HB2    | 364 NGH   | QP3    | 3.7            |
| 218 HIS   | HB3    | 364 NGH   | QP3    | 4.3            |
| 219 GLU-  | QG     | 364 NGH   | QM     | 7.3            |
| 237 PHE   | HN     | 364 NGH   | QM     | 7.1            |
| 239 THR   | HN     | 364 NGH   | QP2    | 6.4            |
| 240 TYR   | HN     | 364 NGH   | QP2    | 5.3            |
| 240 TYR   | HN     | 364 NGH   | QP3    | 5.6            |
| 240 TYR   | HB2    | 364 NGH   | QP3    | 5.9            |
| 240 TYR   | HB3    | 364 NGH   | QM     | 5.3            |
| 241 LYS+  | HN     | 364 NGH   | QP3    | 6.5            |
| 364 NGH   | HNA    | 364 NGH   | QP2    | 5.2            |
| 364 NGH   | HNA    | 364 NGH   | QP3    | 6.4            |
| 364 NGH   | QA     | 364 NGH   | QP2    | 4.0            |
| 364 NGH   | QA     | 364 NGH   | QP3    | 6.2            |
| 364 NGH   | QB     | 364 NGH   | HG     | 4.3            |
| 364 NGH   | QB     | 364 NGH   | QP2    | 3.9            |
| 364 NGH   | QB     | 364 NGH   | QP3    | 6.3            |
| 364 NGH   | QB     | 364 NGH   | QQD    | 4.8            |
| 364 NGH   | HG     | 364 NGH   | QQD    | 4.0            |
| 364 NGH   | QQD    | 364 NGH   | QP2    | 5.8            |
| 364 NGH   | QP2    | 364 NGH   | QP3    | 2.6            |
| 364 NGH   | QP2    | 364 NGH   | QM     | 5.7            |

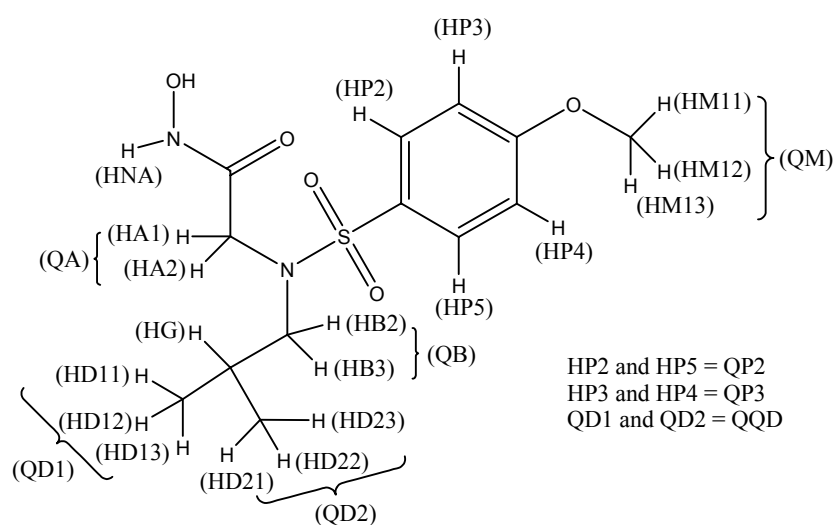

HP2 and HP5 = QP2  
 HP3 and HP4 = QP3  
 QD1 and QD2 = QQD

N-isobutyl-N-[4-methoxyphenylsulfonyl]glycylhydroxamic acid (NNGH)
