# Supplementary material
Source: PubMed Central journal article supplement (PMC556229)
Supplement: pnas_102_15_5334__9.pdf [file pnas_102_15_5334__9.pdf]

**Table 8. Experimental NOESY cross peaks intensities and corresponding upper distance limits**

| Atom1  |     | Atom2 |      | upl  | volume     | Atom1   |        | Atom2 |      | upl  | volume    |            |        |
|--------|-----|-------|------|------|------------|---------|--------|-------|------|------|-----------|------------|--------|
| 4 VAL  |     |       |      |      |            | HG13    | 10     | ILE   | QD1  | 3.4  | 1442000   |            |        |
|        | QG1 | 8     | HIS  | HB2  | 8          | 133800  | HG13   | 55    | ILE  | QG2  | 8         | 188400     |        |
| 7 LYS+ | QG1 | 8     | HIS  | HB3  | 8          | 56200   | QD1    | 11    | THR  | HN   | 8         | 16270      |        |
|        |     |       |      |      |            |         | QD1    | 44    | LYS+ | HN   | 8         | 48240      |        |
|        | HG2 | 9     | TYR  | HA   | 5.9        | 218200  | QD1    | 45    | PHE  | HA   | 8         | 22560      |        |
|        | HG2 | 9     | TYR  | HB2  | 6.9        | 113100  | QD1    | 46    | SER  | HB3  | 8         | 201800     |        |
|        | HG2 | 9     | TYR  | HB3  | 7          | 56100   | QD1    | 54    | ASP- | HB2  | 8         | 129400     |        |
| 8 HIS  | HG3 | 9     | TYR  | HA   | 7          | 95340   | QD1    | 55    | ILE  | QG2  | 8.9       | 219100     |        |
|        | HG3 | 10    | ILE  | QD1  | 8          | 78570   | QD1    | 55    | ILE  | QD1  | 9         | 25370      |        |
|        |     |       |      |      |            |         | QD1    | 120   | LEU  | HA   | 8         | 78930      |        |
|        | HN  | 10    | ILE  | QD1  | 6.4        | 506000  | 11 THR | HN    | 11   | THR  | HA        | 4.7        | 107200 |
|        | HA  | 8     | HIS  | HB2  | 4.6        | 116300  |        | HN    | 11   | THR  | HB        | 5.8        | 30280  |
|        | HA  | 8     | HIS  | HB3  | 5.2        | 59290   |        | HN    | 11   | THR  | QG2       | 4.6        | 214200 |
| HA     | 9   | TYR   | HA   | 4.8  | 91420      | HN      |        | 53    | ALA  | HA   | 7         | 15300      |        |
| HB2    | 9   | TYR   | HN   | 5.4  | 45250      | HN      |        | 54    | ASP- | HB3  | 6.7       | 132200     |        |
| HB2    | 9   | TYR   | HA   | 5    | 75300      | HA      |        | 11    | THR  | HB   | 3.5       | 672700     |        |
| 9 TYR  | HB3 | 9     | TYR  | HN   | 5.2        | 59320   | HA     | 11    | THR  | QG2  | 3.8       | 713300     |        |
|        | HB3 | 9     | TYR  | HA   | 4.6        | 130700  | HA     | 12    | TYR  | HN   | 3.3       | 893600     |        |
|        |     |       |      |      |            |         | HA     | 12    | TYR  | HA   | 5.3       | 50060      |        |
|        | HN  | 9     | TYR  | HA   | 3.6        | 569300  | HA     | 45    | PHE  | HA   | 5.3       | 114600     |        |
|        | HN  | 9     | TYR  | HB2  | 3.4        | 816200  | HA     | 46    | SER  | HN   | 4.3       | 409500     |        |
|        | HN  | 9     | TYR  | HB3  | 3.2        | 1073000 | HA     | 46    | SER  | HB2  | 7         | 86260      |        |
|        | HN  | 10    | ILE  | HG12 | 6.6        | 139800  | HA     | 46    | SER  | HB3  | 6.9       | 118100     |        |
|        | HN  | 10    | ILE  | HG13 | 7          | 63370   | HA     | 47    | LYS+ | HA   | 7         | 4970       |        |
|        | HA  | 9     | TYR  | HB2  | 3.6        | 518500  | HA     | 48    | ILE  | QG2  | 8         | 117300     |        |
|        | HA  | 9     | TYR  | HB3  | 3.6        | 510400  | HA     | 48    | ILE  | QD1  | 8         | 22460      |        |
|        | HA  | 10    | ILE  | HN   | 3.1        | 1269000 | HA     | 53    | ALA  | HA   | 5.6       | 78090      |        |
|        | HA  | 10    | ILE  | HB   | 4.9        | 80200   | HA     | 53    | ALA  | QB   | 8         | 115900     |        |
| 10 ILE | HA  | 10    | ILE  | QG2  | 8          | 63460   | HB     | 11    | THR  | QG2  | 3.4       | 1437000    |        |
|        | HA  | 10    | ILE  | HG13 | 7          | 53980   | HB     | 12    | TYR  | HN   | 3.8       | 425000     |        |
|        | HA  | 10    | ILE  | QD1  | 8          | 100400  | HB     | 46    | SER  | HN   | 6.8       | 124400     |        |
|        | HA  | 44    | LYS+ | HN   | 4.5        | 319800  | HB     | 46    | SER  | HB2  | 7         | 30510      |        |
|        | HB2 | 10    | ILE  | HN   | 4.7        | 113100  | HB     | 47    | LYS+ | HA   | 7         | 49680      |        |
|        | HB2 | 10    | ILE  | HN   | 4.6        | 122700  | HB     | 48    | ILE  | QG2  | 6.7       | 429600     |        |
|        | HB3 | 54    | ASP- | HB2  | 5.1        | 387000  | HB     | 48    | ILE  | HG12 | 6.9       | 117900     |        |
|        |     |       |      |      |            |         | HB     | 48    | ILE  | HG13 | 4.5       | 632200     |        |
|        | HN  | 10    | ILE  | HA   | 3.8        | 386600  | HB     | 48    | ILE  | QD1  | 7         | 359800     |        |
|        | HN  | 10    | ILE  | HB   | 4          | 287200  | HB     | 53    | ALA  | HA   | 6.6       | 137600     |        |
|        | HN  | 10    | ILE  | QG2  | 5.4        | 84440   | QG2    | 12    | TYR  | HN   | 8         | 200100     |        |
|        | HN  | 10    | ILE  | HG12 | 4.9        | 62740   | QG2    | 12    | TYR  | HA   | 7         | 352400     |        |
|        | HN  | 10    | ILE  | HG13 | 4.5        | 98930   | QG2    | 45    | PHE  | HA   | 8         | 32670      |        |
|        | HN  | 10    | ILE  | QD1  | 5.7        | 61440   | QG2    | 46    | SER  | HN   | 7         | 367200     |        |
|        | HA  | 10    | ILE  | HB   | 4.2        | 218700  | QG2    | 46    | SER  | HA   | 8         | 120700     |        |
|        | HA  | 10    | ILE  | QG2  | 3.9        | 548600  | QG2    | 46    | SER  | HB2  | 6.1       | 607000     |        |
|        | HA  | 10    | ILE  | HG12 | 3.8        | 281200  | QG2    | 46    | SER  | HB3  | 6.8       | 389800     |        |
|        | HA  | 10    | ILE  | HG13 | 4          | 228600  | QG2    | 48    | ILE  | QD1  | 5.8       | 1665000    |        |
|        | HA  | 10    | ILE  | QD1  | 4.7        | 186800  | QG2    | 53    | ALA  | HA   | 7.8       | 233600     |        |
|        | HA  | 46    | SER  | HB3  | 7          | 20480   | 12 TYR | HN    | 12   | TYR  | HA        | 4.5        | 138300 |
| HA     | 46  | SER   | HB3  | 7    | 20480      | HN      |        | 12    | TYR  | HB2  | 5.9       | 26500      |        |
| HB     | 10  | ILE   | QG2  | 3.7  | 764900     | HN      |        | 12    | TYR  | HB3  | 5.3       | 49580      |        |
| HB     | 10  | ILE   | HG12 | 3.6  | 388200     | HN      |        | 46    | SER  | HA   | 5.4       | 96760      |        |
| HB     | 10  | ILE   | HG13 | 3.9  | 252200     | HN      |        | 46    | SER  | HB3  | 7         | 42100      |        |
| HB     | 10  | ILE   | QD1  | 4.1  | 450500     | HN      |        | 47    | LYS+ | HA   | 4.5       | 289700     |        |
| HB     | 45  | PHE   | HA   | 7    | 104400     | HA      |        | 12    | TYR  | HB2  | 3.5       | 653800     |        |
| HB     | 45  | PHE   | CG   | 7.1  | 392350.0*2 | HA      |        | 12    | TYR  | HB3  | 3.7       | 453200     |        |
| QG2    | 10  | ILE   | HG12 | 3.9  | 604300     | HA      |        | 12    | TYR  | CG   | 6.7       | 24110.0*2  |        |
| QG2    | 10  | ILE   | HG13 | 3.6  | 969000     | HA      |        | 13    | ARG+ | HN   | 3.5       | 639800     |        |
| QG2    | 10  | ILE   | QD1  | 4.5  | 1110000    | HA      |        | 13    | ARG+ | QD   | 7.2       | 176300.0*2 |        |
| QG2    | 11  | THR   | HN   | 7.1  | 345900     | HA      |        | 46    | SER  | HN   | 6.1       | 47210      |        |
| QG2    | 11  | THR   | HA   | 8    | 26240      | HA      | 53     | ALA   | HA   | 7    | 17220     |            |        |
| QG2    | 12  | TYR   | HA   | 8    | 46400      | HA      | 53     | ALA   | QB   | 6.8  | 405400    |            |        |
| QG2    | 45  | PHE   | HA   | 8    | 26480      | HA      | 55     | ILE   | HN   | 4.5  | 315000    |            |        |
| QG2    | 45  | PHE   | CG   | 9.8  | 226350.0*2 | HA      | 55     | ILE   | HB   | 5.9  | 214000    |            |        |
| QG2    | 54  | ASP-  | HN   | 8    | 64760      | HA      | 55     | ILE   | QG2  | 5.9  | 730100    |            |        |
| QG2    | 54  | ASP-  | HA   | 8    | 52890      | HA      | 55     | ILE   | HG12 | 7    | 75300     |            |        |
| QG2    | 54  | ASP-  | HB2  | 6.6  | 451800     | HA      | 55     | ILE   | QD1  | 7.3  | 307000    |            |        |
| QG2    | 54  | ASP-  | HB3  | 6.8  | 397300     | HA      | 56     | LEU   | HA   | 6.7  | 28680     |            |        |
| QG2    | 55  | ILE   | HN   | 8    | 88040      | HB2     | 12     | TYR   | CG   | 6.8  | 75700.0*2 |            |        |
| QG2    | 55  | ILE   | HB   | 8    | 54040      | HB2     | 13     | ARG+  | HN   | 4.1  | 239200    |            |        |
| QG2    | 55  | ILE   | QG2  | 7    | 654800     | HB2     | 14     | ILE   | HG12 | 6.2  | 175300    |            |        |
| QG2    | 120 | LEU   | HA   | 8    | 72270      | HB2     | 53     | ALA   | QB   | 6.1  | 625600    |            |        |
| QG2    | 120 | LEU   | QD1  | 7.1  | 638400     | HB2     | 55     | ILE   | HN   | 7    | 83070     |            |        |
| HG12   | 10  | ILE   | QD1  | 3.7  | 877300     | HB2     | 55     | ILE   | HB   | 7    | 104900    |            |        |
| HG12   | 11  | THR   | HN   | 7    | 57940      |         |        |       |      |      |           |            |        |
| HG12   | 11  | THR   | QG2  | 7.4  | 281600     |         |        |       |      |      |           |            |        |
| HG12   | 44  | LYS+  | HA   | 7    | 110400     |         |        |       |      |      |           |            |        |



|         |     |    |      |      |     |            |  |         |    |      |     |     |            |
|---------|-----|----|------|------|-----|------------|--|---------|----|------|-----|-----|------------|
|         | HA  | 17 | TYR  | HB2  | 3.6 | 587300     |  | HA      | 23 | ARG+ | QG  | 3.8 | 842000.0*2 |
|         | HA  | 17 | TYR  | HB3  | 3.9 | 357800     |  | HA      | 23 | ARG+ | HD3 | 3.4 | 551000     |
|         | HA  | 17 | TYR  | CZ   | 5.3 | 81800.0*2  |  | HA      | 24 | GLU- | HN  | 4.6 | 122500     |
|         | HA  | 26 | VAL  | HA   | 6.7 | 28350      |  | HA      | 26 | VAL  | HN  | 5.2 | 189000     |
|         | HB2 | 17 | TYR  | CZ   | 6.1 | 185050.0*2 |  | HA      | 27 | ASP- | HN  | 6.2 | 67440      |
|         | HB2 | 23 | ARG+ | HA   | 4.8 | 492100     |  | HB2     | 23 | ARG+ | HG2 | 3.3 | 673300     |
|         | HB2 | 23 | ARG+ | HG2  | 5.6 | 269800     |  | HB2     | 23 | ARG+ | HG3 | 3.4 | 563300     |
|         | HB3 | 17 | TYR  | CZ   | 6   | 202300.0*2 |  | HB2     | 23 | ARG+ | QG  | 4.7 | 366750.0*2 |
|         | CZ  | 23 | ARG+ | HB2  | 9   | 55150.0*2  |  | HB2     | 23 | ARG+ | HD2 | 3.9 | 247200     |
|         | CZ  | 23 | ARG+ | HB3  | 9   | 43420.0*2  |  | HB2     | 23 | ARG+ | HD3 | 3.7 | 353900     |
|         | CZ  | 23 | ARG+ | HD2  | 9   | 44115.0*2  |  | HB2     | 24 | GLU- | HN  | 4.2 | 224600     |
|         | CZ  | 23 | ARG+ | HD3  | 9   | 40690.0*2  |  | HB2     | 24 | GLU- | HA  | 5.6 | 37400      |
|         | CZ  | 26 | VAL  | HB   | 7.1 | 401250.0*2 |  | HB3     | 23 | ARG+ | HG2 | 3.2 | 772100     |
|         | CZ  | 26 | VAL  | QG2  | 7.9 | 734500.0*2 |  | HB3     | 23 | ARG+ | HG3 | 3.3 | 706600     |
| 19 PRO  |     |    |      |      |     |            |  | HB3     | 23 | ARG+ | QG  | 4.7 | 328300.0*2 |
|         | HB2 | 19 | PRO  | HD2  | 4.5 | 104200     |  | HB3     | 23 | ARG+ | HD2 | 3.8 | 289100     |
|         | HB2 | 19 | PRO  | HD3  | 4.3 | 136500     |  | HB3     | 23 | ARG+ | HD3 | 3.7 | 373000     |
|         | HB2 | 20 | ASP- | HN   | 5.7 | 33930      |  | HB3     | 24 | GLU- | HN  | 4.1 | 264200     |
|         | HB3 | 19 | PRO  | HD2  | 3.7 | 361100     |  | HB3     | 24 | GLU- | HA  | 5.1 | 69150      |
|         | HB3 | 19 | PRO  | HD3  | 3.5 | 453300     |  | HB3     | 24 | GLU- | QB  | 8   | 28610.0*2  |
|         | HB3 | 20 | ASP- | HN   | 4.9 | 85030      |  | HB3     | 24 | GLU- | QG  | 8   | 24675.0*2  |
|         | HG2 | 19 | PRO  | HD2  | 3.7 | 327500     |  | HB3     | 25 | ASP- | HB2 | 5.9 | 223800     |
|         | HG2 | 19 | PRO  | HD3  | 3.4 | 579000     |  | HG2     | 23 | ARG+ | HD2 | 3.5 | 519300     |
|         | HD2 | 20 | ASP- | HN   | 7   | 79200      |  | HG2     | 23 | ARG+ | HD3 | 3.3 | 721900     |
|         | HD2 | 20 | ASP- | HB2  | 7   | 15070      |  | HG2     | 28 | TYR  | HB3 | 7   | 61590      |
|         | HD2 | 21 | MET  | QE   | 8   | 31090      |  | HG3     | 23 | ARG+ | HD3 | 3.3 | 740100     |
|         | HD3 | 20 | ASP- | HN   | 7   | 39000      |  | HG3     | 27 | ASP- | HB3 | 7   | 101900     |
|         | HD3 | 20 | ASP- | HB2  | 7   | 12450      |  | HG3     | 28 | TYR  | HB3 | 7   | 41910      |
|         | HD3 | 21 | MET  | QE   | 8   | 27550      |  | QG      | 23 | ARG+ | HD2 | 4.7 | 372300.0*2 |
| 20 ASP- |     |    |      |      |     |            |  | QG      | 24 | GLU- | QB  | 9   | 20985.0*4  |
|         | HN  | 20 | ASP- | HA   | 3.6 | 560600     |  | QG      | 25 | ASP- | HB2 | 8   | 57450.0*2  |
|         | HN  | 20 | ASP- | HB2  | 4.6 | 116700     |  | QG      | 26 | VAL  | HA  | 8   | 108900.0*2 |
|         | HN  | 20 | ASP- | HB3  | 4.1 | 244400     |  |         |    |      |     |     |            |
|         | HN  | 21 | MET  | QG   | 8   | 19665.0*2  |  | 24 GLU- |    |      |     |     |            |
|         | HA  | 21 | MET  | HN   | 4.2 | 219700     |  | HN      | 24 | GLU- | QB  | 4.4 | 418050.0*2 |
|         | HA  | 21 | MET  | QE   | 7.8 | 229800     |  | HN      | 24 | GLU- | QG  | 5   | 204500.0*2 |
| 21 MET  |     |    |      |      |     |            |  | HA      | 24 | GLU- | QB  | 4.3 | 994500.0*2 |
|         | HN  | 21 | MET  | HB2  | 4.9 | 88980      |  | HA      | 24 | GLU- | QG  | 4.2 | 420000.0*2 |
|         | HN  | 21 | MET  | HB3  | 3.6 | 515200     |  | HA      | 25 | ASP- | HN  | 4.8 | 94950      |
|         | HN  | 21 | MET  | QG   | 6.4 | 36750.0*2  |  | HA      | 25 | ASP- | HB2 | 5.5 | 43800      |
|         | HN  | 22 | ASN  | HA   | 4.8 | 94600      |  | HA      | 25 | ASP- | HB3 | 6.1 | 22700      |
|         | HA  | 21 | MET  | HB2  | 3.3 | 934300     |  | HA      | 28 | TYR  | HB3 | 4.4 | 528200     |
|         | HA  | 21 | MET  | HB3  | 3.5 | 675900     |  | HA      | 28 | TYR  | CG  | 9   | 82650.0*2  |
|         | HA  | 21 | MET  | QG   | 4.6 | 211050.0*2 |  | QB      | 24 | GLU- | QG  | 5.2 | 781500.0*4 |
|         | HA  | 21 | MET  | QE   | 5.2 | 107300     |  | QB      | 25 | ASP- | HN  | 5.6 | 118650.0*2 |
|         | HB2 | 21 | MET  | QE   | 6.1 | 38650      |  | QG      | 25 | ASP- | HN  | 8   | 93950.0*2  |
|         | HB2 | 22 | ASN  | HN   | 4.4 | 162500     |  | QG      | 28 | TYR  | HB2 | 8   | 22505.0*2  |
|         | HB2 | 22 | ASN  | HB3  | 7   | 56260      |  | 25 ASP- |    |      |     |     |            |
|         | HB3 | 21 | MET  | QG   | 5.3 | 134300.0*2 |  | HN      | 25 | ASP- | HB2 | 3.9 | 362100     |
|         | HB3 | 21 | MET  | QE   | 4.1 | 417400     |  | HN      | 25 | ASP- | HB3 | 4.1 | 248300     |
|         | HB3 | 22 | ASN  | HN   | 4.7 | 112500     |  | HA      | 25 | ASP- | HB2 | 3.4 | 804400     |
|         | HB3 | 22 | ASN  | HB3  | 7   | 38920      |  | HA      | 25 | ASP- | HB3 | 3.3 | 862400     |
|         | QG  | 21 | MET  | QE   | 7.4 | 29660.0*2  |  | HA      | 28 | TYR  | HB2 | 5   | 244600     |
| 22 ASN  |     |    |      |      |     |            |  | HA      | 28 | TYR  | HB3 | 4.3 | 620800     |
|         | HN  | 22 | ASN  | HA   | 3   | 1745000    |  | HB2     | 26 | VAL  | HN  | 4   | 306400     |
|         | HN  | 22 | ASN  | HB2  | 3.7 | 499300     |  | HB2     | 28 | TYR  | HB2 | 5.9 | 214700     |
|         | HN  | 22 | ASN  | HB3  | 3.7 | 502800     |  | HB3     | 26 | VAL  | HN  | 4.3 | 189100     |
|         | HA  | 22 | ASN  | HB2  | 3.2 | 1169000    |  | 26 VAL  |    |      |     |     |            |
|         | HA  | 22 | ASN  | HB3  | 3.6 | 574300     |  | HN      | 26 | VAL  | HA  | 4   | 277300     |
|         | HA  | 23 | ARG+ | HA   | 4.5 | 138200     |  | HA      | 26 | VAL  | HB  | 4.3 | 193800     |
|         | HA  | 25 | ASP- | HB2  | 4.5 | 498000     |  | HA      | 26 | VAL  | QG2 | 3.9 | 622400     |
|         | HB2 | 22 | ASN  | HD21 | 3.7 | 372800     |  | HA      | 28 | TYR  | HB2 | 6.1 | 75460      |
|         | HB2 | 24 | GLU- | HN   | 5.5 | 139700     |  | HA      | 29 | ALA  | QB  | 4.5 | 451500     |
|         | HB2 | 24 | GLU- | QB   | 8   | 76400.0*2  |  | HB      | 29 | ALA  | QB  | 8   | 49940      |
|         | HB3 | 22 | ASN  | HD21 | 3.9 | 265300     |  | QG2     | 27 | ASP- | HN  | 7.4 | 280900     |
|         | HB3 | 23 | ARG+ | HG3  | 7   | 76750      |  | QG2     | 30 | ILE  | HB  | 7.9 | 220100     |
|         | HB3 | 24 | GLU- | HN   | 5.5 | 145800     |  | 27 ASP- |    |      |     |     |            |
|         | HB3 | 24 | GLU- | QB   | 8   | 19545.0*2  |  | HN      | 27 | ASP- | HA  | 3.7 | 430600     |
|         | HB3 | 24 | GLU- | QG   | 7.8 | 126100.0*2 |  | HN      | 27 | ASP- | HB2 | 3.7 | 446100     |
| 23 ARG+ |     |    |      |      |     |            |  | HN      | 27 | ASP- | HB3 | 3.7 | 456500     |
|         | HN  | 23 | ARG+ | HA   | 4.2 | 224600     |  | HN      | 28 | TYR  | HB2 | 5.4 | 49050      |
|         | HN  | 23 | ARG+ | HB2  | 4.1 | 245200     |  | HA      | 27 | ASP- | HB2 | 4   | 306500     |
|         | HN  | 23 | ARG+ | HB3  | 4.3 | 184100     |  | HA      | 27 | ASP- | HB3 | 3.8 | 368400     |
|         | HA  | 23 | ARG+ | HB2  | 3.5 | 660000     |  | HA      | 28 | TYR  | HN  | 4.5 | 136100     |
|         | HA  | 23 | ARG+ | HB3  | 3.6 | 540000     |  | HA      | 29 | ALA  | HA  | 6.4 | 53600      |
|         | HA  | 23 | ARG+ | HG2  | 3.6 | 428700     |  | HA      | 30 | ILE  | HN  | 5.1 | 213300     |
|         | HA  | 23 | ARG+ | HG3  | 4   | 203300     |  | HA      | 30 | ILE  | HB  | 5   | 237100     |
|         |     |    |      |      |     |            |  | HA      | 30 | ILE  | QG2 | 8   | 90460      |

|        |     |     |      |      |      |            |            |     |      |      |      |            |            |            |
|--------|-----|-----|------|------|------|------------|------------|-----|------|------|------|------------|------------|------------|
| 28 TYR | HA  | 30  | ILE  | HG13 | 4.6  | 603000     | QG2        | 31  | ARG+ | HN   | 8    | 134600     |            |            |
|        | HA  | 32  | LYS+ | QG   | 8    | 92550.0*2  | QG2        | 34  | PHE  | HA   | 8    | 55890      |            |            |
|        | HA  | 57  | VAL  | QG2  | 8    | 198400     | QG2        | 34  | PHE  | CG   | 9.6  | 259200.0*2 |            |            |
|        | HB2 | 28  | TYR  | HN   | 4.1  | 260900     | QG2        | 34  | PHE  | CZ   | 8.8  | 390850.0*2 |            |            |
|        | HB2 | 31  | ARG+ | HA   | 5.5  | 131500     | QG2        | 116 | ILE  | HB   | 8    | 66540      |            |            |
|        | HB2 | 32  | LYS+ | QG   | 8    | 103600.0*2 | QG2        | 116 | ILE  | QD1  | 9    | 157800     |            |            |
|        | HB3 | 28  | TYR  | HN   | 4.3  | 188500     | HG12       | 30  | ILE  | QD1  | 4.1  | 445400     |            |            |
|        | HB3 | 31  | ARG+ | HA   | 5.8  | 101800     | HG12       | 116 | ILE  | QG2  | 8    | 26880      |            |            |
|        |     |     |      |      |      |            | HG13       | 34  | PHE  | HA   | 6.5  | 145400     |            |            |
|        |     | HN  | 28   | TYR  | HA   | 3.7        | 428500     | QD1 | 33   | ALA  | HA   | 8          | 54790      |            |
|        |     | HN  | 28   | TYR  | HB2  | 3.7        | 487500     | QD1 | 33   | ALA  | QB   | 5.8        | 1573000    |            |
|        |     | HN  | 28   | TYR  | HB3  | 3.7        | 449500     | QD1 | 34   | PHE  | CZ   | 10         | 11645.0*2  |            |
|        |     | HA  | 28   | TYR  | HB2  | 3.4        | 783500     | QD1 | 57   | VAL  | QG1  | 6.9        | 723100     |            |
|        |     | HA  | 28   | TYR  | HB3  | 3.7        | 457900     | QD1 | 57   | VAL  | QG2  | 7.7        | 417400     |            |
|        |     | HA  | 28   | TYR  | CG   | 5.1        | 195500.0*2 | QD1 | 93   | PHE  | CG   | 10         | 40220.0*2  |            |
|        |     | HA  | 29   | ALA  | HN   | 4.4        | 169600     | QD1 | 108  | LEU  | QD2  | 7.2        | 596100     |            |
|        |     | HA  | 29   | ALA  | QB   | 6          | 50390      | QD1 | 116  | ILE  | QG2  | 7.3        | 556900     |            |
|        |     | HA  | 31   | ARG+ | HB3  | 4.5        | 498800     | QD1 | 116  | ILE  | QD1  | 9          | 152700     |            |
|        |     | HB2 | 28   | TYR  | CG   | 6.1        | 192500.0*2 | CD1 | 57   | VAL  | QG1  | 8          | 126600     |            |
|        |     | HB2 | 28   | TYR  | CZ   | 7.8        | 22165.0*2  |     |      |      |      |            |            |            |
| 29 ALA | HB2 | 30  | ILE  | HN   | 5.8  | 101500     |            |     |      |      |      |            |            |            |
|        | HB2 | 31  | ARG+ | HB3  | 7    | 23960      |            |     |      |      |      |            |            |            |
|        | HB2 | 32  | LYS+ | QG   | 8    | 2651.5*2   |            |     |      |      |      |            |            |            |
|        | HB3 | 28  | TYR  | CG   | 5.8  | 306650.0*2 | 31 ARG+    | HN  | 31   | ARG+ | HA   | 3.8        | 378100     |            |
|        | HB3 | 28  | TYR  | CZ   | 6.9  | 63850.0*2  |            | HN  | 31   | ARG+ | HB2  | 3.7        | 501000     |            |
|        | HB3 | 29  | ALA  | HA   | 4.2  | 222900     |            | HN  | 31   | ARG+ | HB3  | 3.4        | 839300     |            |
|        | HB3 | 29  | ALA  | QB   | 6.5  | 492100     |            | HN  | 31   | ARG+ | QD   | 7.1        | 17065.0*2  |            |
|        | HB3 | 30  | ILE  | HN   | 5.3  | 182200     |            | HA  | 31   | ARG+ | HB2  | 3.4        | 808100     |            |
|        | HB3 | 32  | LYS+ | QG   | 8    | 13505.0*2  |            | HA  | 31   | ARG+ | HB3  | 3.2        | 1186000    |            |
|        | CG  | 32  | LYS+ | HD2  | 9    | 14290.0*2  |            | HA  | 31   | ARG+ | HG2  | 3.3        | 724900     |            |
|        | CZ  | 29  | ALA  | HA   | 9    | 44090.0*2  |            | HA  | 31   | ARG+ | HG3  | 3.5        | 489000     |            |
|        | CZ  | 141 | ILE  | QG2  | 10   | 134150.0*2 |            | HA  | 31   | ARG+ | QD   | 5.1        | 173600.0*2 |            |
|        |     |     |      |      |      |            |            | HA  | 32   | LYS+ | HN   | 3.7        | 473800     |            |
|        |     | HN  | 29   | ALA  | HA   | 3.3        | 982000     |     | HA   | 33   | ALA  | HA         | 7          | 27200      |
|        |     | HA  | 29   | ALA  | QB   | 3.2        | 2088000    |     | HA   | 34   | PHE  | HN         | 5.6        | 129800     |
|        |     | HA  | 30   | ILE  | HA   | 4.8        | 93000      |     | HA   | 34   | PHE  | CG         | 9          | 112850.0*2 |
|        |     | HA  | 32   | LYS+ | HN   | 5          | 249500     |     | HA   | 47   | LYS+ | QG         | 8          | 54750.0*2  |
|        |     | HA  | 108  | LEU  | QD2  | 8          | 56440      |     | HB2  | 31   | ARG+ | HG2        | 2.9        | 1587000    |
|        |     | HA  | 141  | ILE  | QD1  | 8          | 138000     |     | HB2  | 31   | ARG+ | HG3        | 3          | 1284000    |
|        |     | QB  | 30   | ILE  | HN   | 3.3        | 1955000    |     | HB2  | 31   | ARG+ | QD         | 5          | 223600.0*2 |
|        | QB  | 30  | ILE  | HA   | 5.3  | 103400     |            | HB2 | 32   | LYS+ | QG   | 7          | 209500.0*2 |            |
|        | QB  | 30  | ILE  | HB   | 8    | 121300     |            | HB2 | 47   | LYS+ | QG   | 8          | 59000.0*2  |            |
|        | QB  | 30  | ILE  | QG2  | 6.9  | 723800     |            | HB3 | 31   | ARG+ | HG3  | 3.2        | 907100     |            |
|        | QB  | 30  | ILE  | HG12 | 6.9  | 384000     |            | HB3 | 31   | ARG+ | QD   | 4.5        | 480600.0*2 |            |
|        | QB  | 30  | ILE  | QD1  | 9    | 166500     |            | HB3 | 32   | LYS+ | HA   | 4.9        | 85150      |            |
|        | QB  | 32  | LYS+ | QG   | 9    | 176750.0*2 |            | HG2 | 31   | ARG+ | QD   | 4.5        | 466850.0*2 |            |
|        | QB  | 33  | ALA  | QB   | 7    | 660800     |            | HG2 | 35   | GLN  | QB   | 8          | 65600.0*2  |            |
|        | QB  | 101 | THR  | QG2  | 7.9  | 380600     |            | HG2 | 35   | GLN  | HG2  | 7          | 21220      |            |
|        | QB  | 108 | LEU  | HN   | 8    | 105600     |            | HG2 | 47   | LYS+ | HA   | 7          | 62140      |            |
|        | QB  | 109 | PHE  | HB2  | 8    | 164700     |            | HG3 | 31   | ARG+ | QD   | 4.2        | 812000.0*2 |            |
|        | QB  | 109 | PHE  | HB3  | 7.3  | 295400     |            | HG3 | 35   | GLN  | HG2  | 7          | 34680      |            |
|        | QB  | 109 | PHE  | CG   | 10   | 138900.0*2 |            | HG3 | 35   | GLN  | HG3  | 7          | 38190      |            |
|        | QB  | 110 | LEU  | HN   | 8    | 50280      |            | QD  | 32   | LYS+ | HN   | 8          | 24615.0*2  |            |
|        |     |     |      |      |      |            |            | QD  | 35   | GLN  | HN   | 8          | 10320.0*2  |            |
| 30 ILE |     |     |      |      |      |            | 32 LYS+    | HN  | 32   | LYS+ | HA   | 3.9        | 322000     |            |
|        |     | HN  | 30   | ILE  | HA   | 3.6        | 536200     |     | HN   | 32   | LYS+ | QB         | 4.3        | 458150.0*2 |
|        |     | HN  | 30   | ILE  | HB   | 3.4        | 817000     |     | HN   | 32   | LYS+ | QG         | 5.1        | 191850.0*2 |
|        |     | HN  | 30   | ILE  | QG2  | 4.6        | 220300     |     | HN   | 32   | LYS+ | HD2        | 5.5        | 30390      |
|        |     | HN  | 30   | ILE  | QD1  | 5.2        | 106900     |     | HN   | 35   | GLN  | QB         | 7.7        | 42810.0*2  |
|        |     | HA  | 30   | ILE  | HB   | 4.1        | 246300     |     | HA   | 32   | LYS+ | QB         | 4.5        | 631500.0*2 |
|        |     | HA  | 30   | ILE  | QG2  | 3.8        | 697900     |     | HA   | 32   | LYS+ | QG         | 4.1        | 455000.0*2 |
|        |     | HA  | 30   | ILE  | HG12 | 3.8        | 276600     |     | HA   | 32   | LYS+ | HD2        | 3.5        | 513600     |
|        |     | HA  | 30   | ILE  | QD1  | 3.6        | 956300     |     | HA   | 32   | LYS+ | HD3        | 3.6        | 383600     |
|        |     | HA  | 31   | ARG+ | HN   | 4.8        | 96260      |     | HA   | 32   | LYS+ | QE         | 5.8        | 74700.0*2  |
|        |     | HA  | 32   | LYS+ | HN   | 6.1        | 72430      |     | HA   | 33   | ALA  | HN         | 3.8        | 424700     |
|        |     | HA  | 32   | LYS+ | QG   | 7          | 206500.0*2 |     | HA   | 35   | GLN  | QB         | 5.4        | 534500.0*2 |
|        |     | HA  | 33   | ALA  | QB   | 3.9        | 1118000    |     | HA   | 35   | GLN  | HG2        | 7          | 86420      |
|        |     | HA  | 108  | LEU  | QD1  | 7.1        | 327900     |     | HA   | 35   | GLN  | HG3        | 6.5        | 147500     |
|        |     | HA  | 108  | LEU  | QD2  | 8          | 36950      |     | HA   | 36   | VAL  | QG1        | 6.1        | 610400     |
|        |     | HA  | 113  | VAL  | QG2  | 8          | 43510      |     | QB   | 32   | LYS+ | QG         | 5.3        | 741750.0*4 |
|        |     | HA  | 116  | ILE  | QD1  | 8          | 58340      |     | QB   | 32   | LYS+ | HD2        | 4.8        | 293750.0*2 |
|        |     | HB  | 30   | ILE  | QG2  | 3.4        | 1400000    |     | QB   | 32   | LYS+ | HD3        | 4.9        | 242700.0*2 |
|        |     | HB  | 30   | ILE  | HG12 | 3.4        | 612700     |     | QB   | 32   | LYS+ | QE         | 6.5        | 106000.0*4 |
|        |     | HB  | 30   | ILE  | QD1  | 4.6        | 208700     |     | QB   | 33   | ALA  | HN         | 5.1        | 262950.0*2 |
|        | HB  | 31  | ARG+ | HN   | 3.9  | 345700     |            | QB  | 35   | GLN  | QB   | 9          | 37800.0*4  |            |
|        | HB  | 33  | ALA  | QB   | 6.6  | 464000     |            | QB  | 36   | VAL  | QG1  | 9          | 163800.0*2 |            |
|        | QG2 | 30  | ILE  | HG12 | 4.3  | 308700     |            | QB  | 36   | VAL  | QG2  | 9          | 11165.0*2  |            |
|        | QG2 | 30  | ILE  | QD1  | 4.4  | 1252000    |            | QB  | 109  | PHE  | HD1  | 7          | 201200.0*2 |            |
|        |     |     |      |      |      |            |            | QB  | 109  | PHE  | HE1  | 7.2        | 181000.0*2 |            |

|        |        |     |      |      |     |            |            |         |      |      |      |            |             |        |
|--------|--------|-----|------|------|-----|------------|------------|---------|------|------|------|------------|-------------|--------|
| 33 ALA | QG     | 32  | LYS+ | QE   | 5.9 | 235575.0*4 | 36 VAL     | HA      | 36   | VAL  | HA   | 5.5        | 43770       |        |
|        | QG     | 33  | ALA  | HN   | 8   | 98650.0*2  |            | HA      | 38   | SER  | HN   | 4.9        | 282600      |        |
|        | QG     | 34  | PHE  | HN   | 6.7 | 248650.0*2 |            | HA      | 39   | ASN  | HN   | 5.6        | 127500      |        |
|        | QG     | 35  | GLN  | QB   | 8.6 | 137775.0*4 |            | HA      | 40   | VAL  | HN   | 7          | 19550       |        |
|        | QG     | 35  | GLN  | HG3  | 8   | 33045.0*2  |            | HA      | 45   | PHE  | CG   | 9          | 95400.0*2   |        |
|        | QG     | 35  | GLN  | HE21 | 8   | 39760.0*2  |            | QB      | 35   | GLN  | HG2  | 4.3        | 730500.0*2  |        |
|        | QG     | 109 | PHE  | HD2  | 6.8 | 228650.0*2 |            | QB      | 35   | GLN  | HG3  | 4          | 1231500.0*2 |        |
|        | HD2    | 32  | LYS+ | QE   | 4.6 | 393300.0*2 |            | QB      | 35   | GLN  | HE21 | 4.9        | 247850.0*2  |        |
|        | HD2    | 35  | GLN  | HN   | 7   | 34750      |            | QB      | 35   | GLN  | HE22 | 7.1        | 16510.0*2   |        |
|        | HD2    | 35  | GLN  | QB   | 8   | 49235.0*2  |            | QB      | 36   | VAL  | QG2  | 9          | 12640.0*2   |        |
|        | HD2    | 35  | GLN  | HG2  | 7   | 21250      |            | QB      | 37   | TRP  | HN   | 8          | 9315.0*2    |        |
|        | HD2    | 35  | GLN  | HG3  | 7   | 35600      |            | QB      | 38   | SER  | HN   | 8          | 15290.0*2   |        |
|        | HD3    | 32  | LYS+ | QE   | 5   | 211650.0*2 |            | HG2     | 35   | GLN  | HE22 | 4.3        | 133600      |        |
|        | HD3    | 35  | GLN  | QB   | 8   | 8930.0*2   |            | HG2     | 36   | VAL  | HN   | 5.6        | 266300      |        |
|        | QE     | 141 | ILE  | QD1  | 9   | 117400.0*2 |            | HG2     | 36   | VAL  | QG1  | 8          | 61730       |        |
|        |        |     |      |      |     |            |            | HG2     | 39   | ASN  | HA   | 7          | 74750       |        |
|        |        |     |      |      |     |            |            | HG2     | 39   | ASN  | QB   | 8          | 15340.0*2   |        |
|        |        |     |      |      |     |            |            | HG3     | 35   | GLN  | HE21 | 4.1        | 198900      |        |
|        |        |     |      |      |     |            |            | HG3     | 35   | GLN  | HE22 | 4.4        | 125500      |        |
|        |        |     |      |      |     |            |            | HG3     | 36   | VAL  | HA   | 7          | 28530       |        |
|        |        |     |      |      |     |            |            | HG3     | 36   | VAL  | QG1  | 8          | 32870       |        |
|        |        |     |      |      |     |            |            | HG3     | 39   | ASN  | HA   | 7          | 65830       |        |
|        |        |     |      |      |     |            |            | HG3     | 39   | ASN  | QB   | 8          | 16015.0*2   |        |
|        | 34 PHE | HN  | 33   | ALA  | HA  | 3.2        |            | 1217000 | HN   | 36   | VAL  | HA         | 3.5         | 701000 |
|        |        | HN  | 33   | ALA  | QB  | 3.8        |            | 794200  | HN   | 36   | VAL  | HB         | 3.4         | 833200 |
|        |        | HN  | 116  | ILE  | QD1 | 8          |            | 38840   | HN   | 36   | VAL  | QG1        | 3.6         | 972900 |
| HA     |        | 33  | ALA  | QB   | 3.1 | 2924000    | HN         | 113     | VAL  | QG1  | 8    | 57290      |             |        |
| HA     |        | 36  | VAL  | QG2  | 6.2 | 590100     | HA         | 36      | VAL  | HB   | 3.5  | 635000     |             |        |
| HA     |        | 37  | TRP  | HN   | 5.1 | 208300     | HA         | 36      | VAL  | QG1  | 3.5  | 1126000    |             |        |
| HA     |        | 109 | PHE  | CG   | 9   | 102700.0*2 | HA         | 36      | VAL  | QG2  | 3.8  | 702500     |             |        |
| HA     |        | 109 | PHE  | HD1  | 5.8 | 227000     | HA         | 37      | TRP  | HN   | 4.2  | 221800     |             |        |
| HA     |        | 112 | ALA  | QB   | 5   | 1352000    | HA         | 39      | ASN  | HA   | 7    | 30560      |             |        |
| HA     |        | 113 | VAL  | HN   | 5.1 | 141500     | HA         | 39      | ASN  | QB   | 6.4  | 161300.0*2 |             |        |
| HA     |        | 113 | VAL  | HA   | 5.3 | 118300     | HA         | 39      | ASN  | HD22 | 7    | 46140      |             |        |
| HA     |        | 113 | VAL  | HB   | 5.6 | 273100     | HA         | 40      | VAL  | QG2  | 8    | 160500     |             |        |
| HA     |        | 113 | VAL  | QG1  | 8   | 154300     | HA         | 145     | ARG+ | HA   | 6.3  | 38070      |             |        |
| HA     |        | 113 | VAL  | QG2  | 5.2 | 1143000    | HB         | 36      | VAL  | QG1  | 3.5  | 1144000    |             |        |
| HA     |        | 114 | HIS  | HN   | 6.6 | 29040      | HB         | 36      | VAL  | QG2  | 3.5  | 1052000    |             |        |
| HA     |        | 116 | ILE  | QG2  | 5.4 | 1038000    | HB         | 37      | TRP  | HN   | 3.8  | 416900     |             |        |
| HA     |        | 116 | ILE  | QD1  | 8   | 98300      | HB         | 37      | TRP  | HA   | 4.5  | 140100     |             |        |
| QB     |        | 34  | PHE  | HN   | 4.4 | 304100     | HB         | 113     | VAL  | QG1  | 6.3  | 540500     |             |        |
| QB     |        | 35  | GLN  | QB   | 9   | 92450.0*2  | HB         | 113     | VAL  | QG2  | 8    | 115000     |             |        |
| QB     |        | 113 | VAL  | HA   | 5.9 | 704200     | HB         | 116     | ILE  | QG2  | 7.3  | 306000     |             |        |
| QB     |        | 113 | VAL  | QG2  | 5.3 | 2503000    | HB         | 146     | LEU  | HG   | 5.8  | 230000     |             |        |
| QB     |        | 116 | ILE  | HA   | 8   | 75550      | QG1        | 37      | TRP  | HN   | 5.3  | 1119000    |             |        |
| QB     |        | 116 | ILE  | QG2  | 9   | 129500     | QG1        | 37      | TRP  | HD1  | 8    | 152300     |             |        |
| QB     |        | 116 | ILE  | QD1  | 6   | 1443000    | QG1        | 39      | ASN  | HD22 | 5.5  | 939700     |             |        |
| 35 GLN |        | HN  | 34   | PHE  | HA  | 3.8        | 389300     | QG1     | 109  | PHE  | CG   | 10         | 58150.0*2   |        |
|        |        | HN  | 34   | PHE  | QB  | 4.5        | 327850.0*2 | QG1     | 113  | VAL  | QG1  | 6          | 1390000     |        |
|        | HN     | 36  | VAL  | QG2  | 8   | 155000     | QG1        | 113     | VAL  | QG2  | 6.3  | 1137000    |             |        |
|        | HN     | 116 | ILE  | QD1  | 8   | 84830      | QG1        | 144     | PHE  | CZ   | 9.3  | 303400.0*2 |             |        |
|        | HA     | 34  | PHE  | QB   | 5   | 282750.0*2 | QG2        | 37      | TRP  | HA   | 5.9  | 700100     |             |        |
|        | HA     | 34  | PHE  | CG   | 4.9 | 262850.0*2 | QG2        | 39      | ASN  | HN   | 8    | 106500     |             |        |
|        | HA     | 34  | PHE  | CZ   | 6.2 | 27875.0*2  | QG2        | 109     | PHE  | HE1  | 7.6  | 253700     |             |        |
|        | HA     | 35  | GLN  | HN   | 4.7 | 108500     | QG2        | 113     | VAL  | QG1  | 6.1  | 1307000    |             |        |
|        | HA     | 37  | TRP  | HB2  | 6.4 | 54320      | QG2        | 113     | VAL  | QG2  | 6.5  | 943300     |             |        |
|        | HA     | 45  | PHE  | CG   | 8.4 | 161900.0*2 | QG2        | 131     | VAL  | HB   | 8    | 34240      |             |        |
|        | HA     | 116 | ILE  | QG2  | 8   | 211900     | HN         | 37      | TRP  | HB2  | 3.8  | 384200     |             |        |
|        | HA     | 116 | ILE  | QD1  | 8   | 213200     | HN         | 37      | TRP  | HB3  | 3.9  | 355600     |             |        |
|        | QB     | 34  | PHE  | CG   | 7.1 | 179725.0*4 | HN         | 40      | VAL  | QG2  | 8    | 211600     |             |        |
|        | QB     | 34  | PHE  | CZ   | 9.5 | 11475.0*4  | HN         | 113     | VAL  | QG2  | 6.9  | 380600     |             |        |
|        | QB     | 35  | GLN  | HN   | 5.5 | 147850.0*2 | HA         | 37      | TRP  | HB2  | 3.7  | 446800     |             |        |
|        | QB     | 35  | GLN  | HA   | 5.1 | 233450.0*2 | HA         | 37      | TRP  | HB3  | 3.5  | 624500     |             |        |
|        | QB     | 36  | VAL  | HB   | 7.4 | 159100.0*2 | HA         | 116     | ILE  | QG2  | 8    | 18160      |             |        |
|        | QB     | 45  | PHE  | CG   | 9.7 | 128175.0*4 | HB2        | 37      | TRP  | HD1  | 3.6  | 403500     |             |        |
|        | QB     | 116 | ILE  | QD1  | 9   | 19980.0*2  | HB2        | 37      | TRP  | HZ2  | 6.7  | 9508       |             |        |
|        | CG     | 116 | ILE  | QG2  | 10  | 72950.0*2  | HB2        | 38      | SER  | HN   | 4.9  | 80370      |             |        |
|        | CG     | 116 | ILE  | QD1  | 10  | 58250.0*2  | HB2        | 40      | VAL  | HN   | 5.6  | 121600     |             |        |
|        | CZ     | 116 | ILE  | QG2  | 10  | 122350.0*2 | HB2        | 40      | VAL  | QG2  | 8    | 30780      |             |        |
|        | CZ     | 116 | ILE  | HG12 | 9   | 4816.5*2   | HB2        | 113     | VAL  | QG1  | 8    | 82120      |             |        |
|        | CZ     | 116 | ILE  | HG13 | 9   | 4673.0*2   | HB2        | 116     | ILE  | QD1  | 8    | 28340      |             |        |
|        | CZ     | 116 | ILE  | QD1  | 10  | 67750.0*2  | HB2        | 120     | LEU  | QD2  | 7.4  | 280600     |             |        |
|        | 36 VAL | HN  | 35   | GLN  | HA  | 3.5        | 654300     | HB2     | 121  | GLY  | HN   | 7          | 76460       |        |
| HN     |        | 35  | GLN  | QB   | 4.1 | 669000.0*2 | HB2        | 154     | ILE  | QG2  | 8    | 207500     |             |        |
| HN     |        | 35  | GLN  | HG2  | 4.5 | 103800     | HB3        | 37      | TRP  | HD1  | 3.7  | 326500     |             |        |
| HN     |        | 35  | GLN  | HG3  | 4.3 | 133000     |            |         |      |      |      |            |             |        |
| HN     |        | 36  | VAL  | QG1  | 8   | 185700     |            |         |      |      |      |            |             |        |
| HN     |        | 113 | VAL  | QG2  | 8   | 57800      |            |         |      |      |      |            |             |        |
| HA     |        | 35  | GLN  | QB   | 4.4 | 826000.0*2 |            |         |      |      |      |            |             |        |
| HA     |        | 35  | GLN  | HG2  | 3.7 | 320000     |            |         |      |      |      |            |             |        |
| HA     |        | 35  | GLN  | HG3  | 3.6 | 378300     |            |         |      |      |      |            |             |        |
| HA     |        | 36  | VAL  | HN   | 4.2 | 205500     |            |         |      |      |      |            |             |        |

|        |      |     |      |      |     |            |
|--------|------|-----|------|------|-----|------------|
|        | HB3  | 37  | TRP  | HZ2  | 6.3 | 13130      |
|        | HB3  | 38  | SER  | HN   | 5   | 77850      |
|        | HB3  | 40  | VAL  | QG2  | 8   | 20020      |
|        | HB3  | 41  | THR  | HB   | 7   | 108600     |
|        | HB3  | 41  | THR  | QG2  | 8   | 188500     |
|        | HB3  | 120 | LEU  | QD2  | 7.5 | 276000     |
|        | HE1  | 113 | VAL  | HA   | 4.7 | 556800     |
|        | HE1  | 113 | VAL  | QG1  | 6.5 | 494200     |
|        | HE1  | 113 | VAL  | QG2  | 8   | 107100     |
|        | HE1  | 116 | ILE  | HB   | 5.6 | 275600     |
|        | HE1  | 116 | ILE  | QG2  | 8   | 129900     |
|        | HE1  | 116 | ILE  | QD1  | 8   | 84520      |
|        | HE1  | 117 | GLY  | HA1  | 7   | 28330      |
|        | HE1  | 117 | GLY  | HA2  | 7   | 25600      |
|        | HZ3  | 40  | VAL  | HB   | 6.3 | 171600     |
|        | HZ3  | 117 | GLY  | HA2  | 7   | 20750      |
|        | HZ3  | 131 | VAL  | QG1  | 7.4 | 280000     |
|        | HZ3  | 154 | ILE  | QG2  | 6.5 | 484800     |
|        | HZ3  | 155 | GLN  | HG2  | 7   | 54510      |
|        | HZ3  | 155 | GLN  | HG3  | 7   | 54630      |
| 38 SER |      |     |      |      |     |            |
|        | HN   | 38  | SER  | HA   | 4   | 290700     |
|        | HN   | 38  | SER  | HB2  | 3.7 | 448700     |
|        | HN   | 38  | SER  | HB3  | 3.8 | 403100     |
|        | HA   | 39  | ASN  | HN   | 4   | 283100     |
|        | HA   | 41  | THR  | HA   | 5.7 | 107000     |
|        | HA   | 41  | THR  | HB   | 5   | 241400     |
|        | HB2  | 39  | ASN  | HN   | 4.5 | 141600     |
|        | HB2  | 39  | ASN  | HA   | 5.6 | 37700      |
|        | HB2  | 40  | VAL  | QG1  | 8   | 118200     |
|        | HB2  | 40  | VAL  | QG2  | 8   | 136900     |
|        | HB2  | 41  | THR  | QG2  | 6.7 | 426900     |
|        | HB2  | 45  | PHE  | CG   | 7.3 | 336600.0*2 |
|        | HB3  | 39  | ASN  | HN   | 4.4 | 153800     |
|        | HB3  | 39  | ASN  | HA   | 4.5 | 136200     |
|        | HB3  | 44  | LYS+ | QG   | 8   | 12875.0*2  |
|        | HB3  | 45  | PHE  | CG   | 7.2 | 359250.0*2 |
| 39 ASN |      |     |      |      |     |            |
|        | HN   | 40  | VAL  | HB   | 5.9 | 27500      |
|        | HN   | 40  | VAL  | QG1  | 8   | 180500     |
|        | HN   | 40  | VAL  | QG2  | 7.9 | 218500     |
|        | QB   | 40  | VAL  | HA   | 6.3 | 55400.0*2  |
|        | QB   | 40  | VAL  | HB   | 8   | 38590.0*2  |
|        | QB   | 40  | VAL  | QG1  | 7.6 | 443750.0*2 |
|        | QB   | 40  | VAL  | QG2  | 9   | 101700.0*2 |
|        | HD21 | 40  | VAL  | QG1  | 8   | 81650      |
| 40 VAL |      |     |      |      |     |            |
|        | HN   | 40  | VAL  | HA   | 3.8 | 414900     |
|        | HN   | 40  | VAL  | HB   | 4.6 | 118300     |
|        | HN   | 40  | VAL  | QG1  | 4.4 | 276300     |
|        | HN   | 40  | VAL  | QG2  | 3.6 | 980900     |
|        | HN   | 41  | THR  | HA   | 5.8 | 31100      |
|        | HN   | 41  | THR  | QG2  | 8   | 114100     |
|        | HA   | 40  | VAL  | HB   | 3.1 | 1393000    |
|        | HA   | 40  | VAL  | QG1  | 3.3 | 1565000    |
|        | HA   | 40  | VAL  | QG2  | 3.7 | 826100     |
|        | HA   | 41  | THR  | HN   | 3.9 | 331000     |
|        | HA   | 41  | THR  | HA   | 4.7 | 111200     |
|        | HA   | 41  | THR  | QG2  | 8   | 140400     |
|        | HB   | 40  | VAL  | QG1  | 3.2 | 2052000    |
|        | HB   | 40  | VAL  | QG2  | 3.5 | 1152000    |
|        | HB   | 41  | THR  | HN   | 6.2 | 20630      |
|        | HB   | 41  | THR  | HA   | 5.3 | 53070      |
|        | HB   | 41  | THR  | QG2  | 8   | 134700     |
|        | HB   | 146 | LEU  | QD2  | 8   | 61540      |
|        | HB   | 151 | ILE  | QG2  | 6.6 | 461300     |
|        | HB   | 154 | ILE  | QG2  | 8   | 194200     |
|        | HB   | 154 | ILE  | HG12 | 7   | 34180      |
|        | QG1  | 41  | THR  | HN   | 8   | 75490      |
|        | QG1  | 41  | THR  | HA   | 8   | 93760      |
|        | QG1  | 41  | THR  | HB   | 7.1 | 340000     |
|        | QG1  | 41  | THR  | QG2  | 6.5 | 956900     |
|        | QG1  | 146 | LEU  | QD2  | 6.4 | 979500     |
|        | QG2  | 41  | THR  | HN   | 7.7 | 238700     |
|        | QG2  | 41  | THR  | HA   | 8   | 37330      |
|        | QG2  | 41  | THR  | HB   | 8   | 119800     |
|        | QG2  | 41  | THR  | QG2  | 6.9 | 718200     |

|         |     |     |      |      |     |            |
|---------|-----|-----|------|------|-----|------------|
|         | QG2 | 145 | ARG+ | HB3  | 5   | 1362000    |
|         | QG2 | 146 | LEU  | QD2  | 6.4 | 1043000    |
|         | QG2 | 154 | ILE  | QG2  | 6.1 | 1300000    |
| 41 THR  |     |     |      |      |     |            |
|         | HN  | 41  | THR  | HA   | 4   | 280100     |
|         | HN  | 41  | THR  | HB   | 5.1 | 65160      |
|         | HN  | 41  | THR  | QG2  | 4.6 | 223200     |
|         | HA  | 41  | THR  | HB   | 3.6 | 548300     |
|         | HA  | 41  | THR  | QG2  | 3.6 | 921000     |
|         | HA  | 43  | LEU  | HB2  | 5.9 | 91000      |
|         | HA  | 120 | LEU  | QB   | 8   | 22600.0*2  |
|         | HB  | 41  | THR  | QG2  | 3.7 | 782600     |
|         | HB  | 120 | LEU  | QB   | 8   | 9550.0*2   |
|         | HB  | 155 | GLN  | HA   | 5.6 | 264600     |
|         | HB  | 157 | LEU  | HN   | 7   | 92600      |
|         | QG2 | 120 | LEU  | QD1  | 7.9 | 381500     |
|         | QG2 | 120 | LEU  | QD2  | 8   | 366400     |
|         | QG2 | 151 | ILE  | HA   | 8   | 144600     |
|         | QG2 | 154 | ILE  | HA   | 8   | 83500      |
|         | QG2 | 154 | ILE  | HB   | 8   | 48180      |
|         | QG2 | 157 | LEU  | HB2  | 6.5 | 484800     |
| 43 LEU  |     |     |      |      |     |            |
|         | HG  | 44  | LYS+ | HA   | 6.6 | 141800     |
|         | QD1 | 154 | ILE  | HA   | 6   | 669000     |
| 44 LYS+ |     |     |      |      |     |            |
|         | HN  | 44  | LYS+ | HA   | 3.2 | 1100000    |
|         | HN  | 44  | LYS+ | HB2  | 3.9 | 331200     |
|         | HN  | 44  | LYS+ | HB3  | 4.1 | 267800     |
|         | HA  | 45  | PHE  | HA   | 5.3 | 50680      |
|         | HB2 | 44  | LYS+ | QG   | 4.4 | 612500.0*2 |
|         | HB2 | 44  | LYS+ | QE   | 6.2 | 45735.0*2  |
|         | HB3 | 44  | LYS+ | QG   | 4.4 | 618000.0*2 |
|         | HB3 | 44  | LYS+ | QE   | 6.4 | 35225.0*2  |
| 45 PHE  |     |     |      |      |     |            |
|         | HN  | 45  | PHE  | HA   | 3.7 | 465800     |
|         | HN  | 45  | PHE  | HB2  | 4.2 | 205000     |
|         | HN  | 45  | PHE  | HB3  | 4.6 | 121400     |
|         | HA  | 45  | PHE  | HB2  | 4.2 | 222700     |
|         | HA  | 45  | PHE  | HB3  | 3.9 | 319000     |
|         | HA  | 45  | PHE  | CG   | 4.9 | 261800.0*2 |
|         | HA  | 46  | SER  | HN   | 3.3 | 886300     |
|         | HA  | 46  | SER  | HA   | 5.5 | 40950      |
|         | HA  | 46  | SER  | HB2  | 5.9 | 28820      |
|         | HA  | 46  | SER  | HB3  | 5.4 | 48080      |
|         | HB2 | 45  | PHE  | CG   | 5.7 | 323900.0*2 |
|         | HB3 | 45  | PHE  | CG   | 5.8 | 276300.0*2 |
|         | CG  | 116 | ILE  | HA   | 9   | 7190.0*2   |
|         | CG  | 116 | ILE  | HB   | 9   | 103050.0*2 |
|         | CG  | 116 | ILE  | QD1  | 10  | 67050.0*2  |
| 46 SER  |     |     |      |      |     |            |
|         | HN  | 46  | SER  | HB2  | 3.6 | 538100     |
|         | HN  | 46  | SER  | HB3  | 3.7 | 501100     |
|         | HA  | 46  | SER  | HB2  | 3.6 | 564300     |
|         | HA  | 46  | SER  | HB3  | 3.6 | 556900     |
|         | HA  | 47  | LYS+ | HN   | 2.9 | 2098000    |
|         | HA  | 47  | LYS+ | HA   | 4.5 | 136500     |
|         | HA  | 47  | LYS+ | HB2  | 4.9 | 80310      |
|         | HA  | 47  | LYS+ | HB3  | 5.7 | 32530      |
|         | HA  | 47  | LYS+ | QD   | 7.6 | 141500.0*2 |
|         | HA  | 48  | ILE  | QG2  | 7.2 | 315700     |
|         | HA  | 48  | ILE  | HG12 | 7   | 91740      |
|         | HB2 | 48  | ILE  | QG2  | 8   | 101800     |
|         | HB2 | 48  | ILE  | QD1  | 8   | 42780      |
|         | HB3 | 47  | LYS+ | QG   | 8   | 81350.0*2  |
|         | HB3 | 48  | ILE  | QG2  | 8   | 91170      |
| 47 LYS+ |     |     |      |      |     |            |
|         | HN  | 47  | LYS+ | HB2  | 4   | 293400     |
|         | HN  | 47  | LYS+ | HB3  | 4.1 | 250600     |
|         | HA  | 47  | LYS+ | HB2  | 3.9 | 320600     |
|         | HA  | 47  | LYS+ | HB3  | 3.7 | 453000     |
|         | HA  | 47  | LYS+ | QG   | 4.6 | 213950.0*2 |
|         | HA  | 47  | LYS+ | QD   | 7.5 | 11275.0*2  |
|         | HA  | 48  | ILE  | HN   | 3.4 | 848700     |
|         | HA  | 48  | ILE  | HA   | 4.5 | 138600     |
|         | HA  | 48  | ILE  | HG13 | 5.1 | 392500     |
|         | HB2 | 47  | LYS+ | QG   | 5   | 214950.0*2 |
|         | HB2 | 47  | LYS+ | QD   | 6.1 | 48705.0*2  |

|         |     |      |      |      |           |            |
|---------|-----|------|------|------|-----------|------------|
| 48 ILE  | HB2 | 48   | ILE  | HA   | 5.8       | 31700      |
|         | HB3 | 47   | LYS+ | QG   | 5.1       | 186200.0*2 |
|         | HB3 | 47   | LYS+ | QD   | 6.4       | 34405.0*2  |
|         | HB3 | 48   | ILE  | HN   | 6.1       | 22630      |
|         | HB3 | 48   | ILE  | HA   | 5.3       | 51490      |
|         | HB3 | 48   | ILE  | QG2  | 6.3       | 558600     |
|         | QG  | 48   | ILE  | HA   | 7.6       | 141200.0*2 |
|         | QG  | 48   | ILE  | HB   | 6.8       | 230450.0*2 |
|         | QG  | 48   | ILE  | HG13 | 6.8       | 231300.0*2 |
|         | QG  | 48   | ILE  | QD1  | 9         | 153950.0*2 |
|         | QG  | 57   | VAL  | HB   | 7.8       | 123400.0*2 |
|         | HN  | 48   | ILE  | HA   | 3.9       | 362500     |
|         | HN  | 48   | ILE  | HB   | 4.4       | 166800     |
|         | HN  | 48   | ILE  | QG2  | 4.5       | 234900     |
|         | HN  | 48   | ILE  | HG12 | 4.4       | 124500     |
|         | HN  | 48   | ILE  | HG13 | 3.9       | 268700     |
|         | HN  | 48   | ILE  | QD1  | 5         | 127600     |
|         | HA  | 48   | ILE  | HB   | 3.4       | 735300     |
|         | HA  | 48   | ILE  | QG2  | 3.6       | 927600     |
|         | HA  | 48   | ILE  | QD1  | 4.8       | 174700     |
|         | HA  | 50   | THR  | QG2  | 8         | 157500     |
|         | HB  | 48   | ILE  | QG2  | 3.7       | 878400     |
|         | HB  | 48   | ILE  | HG12 | 3.6       | 425800     |
| HB      | 48  | ILE  | HG13 | 3.4  | 549300    |            |
| HB      | 48  | ILE  | QD1  | 3.4  | 1352000   |            |
| HB      | 49  | ASN  | HA   | 4.8  | 94700     |            |
| HB      | 50  | THR  | HN   | 7    | 16910     |            |
| HB      | 50  | THR  | QG2  | 6.8  | 390500    |            |
| HB      | 51  | GLY  | HA1  | 5.9  | 91900     |            |
| HB      | 51  | GLY  | HA2  | 6.5  | 50950     |            |
| HB      | 53  | ALA  | QB   | 7.7  | 238200    |            |
| QG2     | 48  | ILE  | HG12 | 4    | 509400    |            |
| QG2     | 50  | THR  | HA   | 8    | 67240     |            |
| QG2     | 50  | THR  | HB   | 8    | 34280     |            |
| QG2     | 53  | ALA  | HA   | 8    | 67790     |            |
| HG12    | 48  | ILE  | QD1  | 3.7  | 756400    |            |
| HG13    | 48  | ILE  | QD1  | 3.2  | 1857000   |            |
| QD1     | 49  | ASN  | QB   | 9    | 13135.0*2 |            |
| QD1     | 51  | GLY  | HA1  | 8    | 205500    |            |
| QD1     | 51  | GLY  | HA2  | 8    | 21050     |            |
| QD1     | 52  | MET  | HA   | 5.6  | 859300    |            |
| QD1     | 53  | ALA  | HN   | 8    | 123200    |            |
| QD1     | 53  | ALA  | HA   | 6.4  | 521100    |            |
| QD1     | 53  | ALA  | QB   | 6.6  | 864500    |            |
| QD1     | 54  | ASP- | HA   | 8    | 151900    |            |
| QD1     | 56  | LEU  | HA   | 8    | 87620     |            |
| 49 ASN  | HA  | 50   | THR  | HA   | 4.6       | 124000     |
|         | HA  | 50   | THR  | HB   | 6.2       | 20500      |
|         | QB  | 50   | THR  | HA   | 5.9       | 80200.0*2  |
|         | QB  | 50   | THR  | HB   | 8         | 21575.0*2  |
| 50 THR  | HA  | 50   | THR  | HB   | 3.2       | 1087000    |
|         | HA  | 50   | THR  | QG2  | 3.2       | 1952000    |
|         | HA  | 51   | GLY  | HA2  | 5.1       | 68350      |
|         | HA  | 52   | MET  | HN   | 6.1       | 75300      |
|         | HB  | 50   | THR  | QG2  | 3.5       | 1061000    |
|         | HB  | 51   | GLY  | HN   | 4.5       | 136800     |
|         | QG2 | 51   | GLY  | HA1  | 8         | 63520      |
|         | QG2 | 51   | GLY  | HA2  | 8         | 27750      |
| 51 GLY  | HA1 | 52   | MET  | HN   | 3.7       | 440900     |
|         | HA2 | 52   | MET  | HN   | 3.7       | 490900     |
| 53 ALA  | HA  | 53   | ALA  | QB   | 3.5       | 1268000    |
|         | HA  | 54   | ASP- | HN   | 3.3       | 982700     |
|         | HA  | 55   | ILE  | HN   | 6.6       | 46530      |
|         | QB  | 54   | ASP- | HN   | 3.6       | 993000     |
| 54 ASP- | QB  | 55   | ILE  | HN   | 4.7       | 376000     |
|         | HN  | 54   | ASP- | HA   | 4         | 301600     |
|         | HN  | 54   | ASP- | HB2  | 4.1       | 261000     |
|         | HN  | 54   | ASP- | HB3  | 4.6       | 131200     |
|         | HA  | 54   | ASP- | HB2  | 3.7       | 458900     |
|         | HA  | 54   | ASP- | HB3  | 3.7       | 488500     |
|         | HB2 | 55   | ILE  | HN   | 4         | 307400     |

|        |     |      |      |      |           |           |
|--------|-----|------|------|------|-----------|-----------|
| 55 ILE | HB2 | 55   | ILE  | HB   | 5.9       | 211300    |
|        | HB3 | 55   | ILE  | HN   | 4.2       | 210200    |
|        | HN  | 55   | ILE  | HA   | 4.6       | 129100    |
|        | HN  | 55   | ILE  | HB   | 4         | 307300    |
|        | HN  | 55   | ILE  | QG2  | 5.3       | 91450     |
|        | HA  | 55   | ILE  | HB   | 4.5       | 147300    |
|        | HA  | 55   | ILE  | QG2  | 4         | 469300    |
|        | HA  | 55   | ILE  | HG12 | 3.5       | 449900    |
|        | HA  | 55   | ILE  | QD1  | 4.9       | 142300    |
|        | HA  | 56   | LEU  | HN   | 3.3       | 945400    |
|        | HA  | 56   | LEU  | HA   | 5.6       | 37700     |
|        | HA  | 56   | LEU  | HB3  | 5.4       | 48720     |
|        | HA  | 56   | LEU  | QD1  | 6.3       | 557200    |
|        | HA  | 90   | ASP- | HN   | 4.7       | 239300    |
|        | HA  | 90   | ASP- | HA   | 4.1       | 556100    |
|        | HA  | 91   | ALA  | HN   | 5.5       | 94440     |
|        | HB  | 55   | ILE  | QG2  | 3.7       | 795200    |
|        | HB  | 55   | ILE  | HG12 | 2.9       | 1643000   |
|        | HB  | 55   | ILE  | QD1  | 3.9       | 584000    |
|        | HB  | 90   | ASP- | HA   | 7         | 34670     |
|        | QG2 | 55   | ILE  | HG12 | 3.9       | 624500    |
|        | QG2 | 55   | ILE  | QD1  | 4.2       | 1930000   |
|        | QG2 | 90   | ASP- | HA   | 7.8       | 230200    |
| QG2    | 116 | ILE  | QD1  | 9    | 46110     |           |
| HG12   | 57  | VAL  | HN   | 4.9  | 452600    |           |
| QD1    | 56  | LEU  | HN   | 8    | 163000    |           |
| QD1    | 56  | LEU  | HA   | 8    | 19450     |           |
| QD1    | 56  | LEU  | HB3  | 7.2  | 313400    |           |
| QD1    | 57  | VAL  | HB   | 8    | 65330     |           |
| QD1    | 90  | ASP- | HN   | 8    | 34640     |           |
| QD1    | 90  | ASP- | HA   | 6.3  | 562900    |           |
| QD1    | 91  | ALA  | HN   | 8    | 141600    |           |
| QD1    | 116 | ILE  | HB   | 8    | 186300    |           |
| QD1    | 116 | ILE  | QD1  | 9    | 79800     |           |
| QD1    | 119 | SER  | HN   | 8    | 122700    |           |
| QD1    | 120 | LEU  | QB   | 9    | 47900.0*2 |           |
| 56 LEU | HN  | 56   | LEU  | HB2  | 4.1       | 263900    |
|        | HN  | 56   | LEU  | HB3  | 4         | 296600    |
|        | HN  | 90   | ASP- | HA   | 4.3       | 421400    |
|        | HA  | 56   | LEU  | HB2  | 3.7       | 438000    |
|        | HA  | 56   | LEU  | HB3  | 3.8       | 413700    |
|        | HA  | 56   | LEU  | QD1  | 4.3       | 344400    |
|        | HA  | 56   | LEU  | QD2  | 4.1       | 414400    |
|        | HA  | 57   | VAL  | HN   | 3.3       | 1005000   |
|        | HA  | 57   | VAL  | HA   | 4.5       | 140000    |
|        | HA  | 57   | VAL  | HB   | 5.3       | 54190     |
|        | HA  | 57   | VAL  | QG1  | 8         | 52610     |
|        | HA  | 58   | VAL  | HA   | 6.8       | 40000     |
|        | HA  | 58   | VAL  | QG2  | 6.4       | 522400    |
|        | HA  | 90   | ASP- | QB   | 8         | 10595.0*2 |
|        | HA  | 91   | ALA  | HN   | 5.3       | 110300    |
|        | HB2 | 56   | LEU  | QD1  | 4         | 543200    |
|        | HB2 | 57   | VAL  | HN   | 4.7       | 113400    |
|        | HB2 | 58   | VAL  | HB   | 6         | 200100    |
|        | HB2 | 90   | ASP- | HA   | 7         | 74140     |
|        | HB2 | 90   | ASP- | QB   | 8         | 45280.0*2 |
|        | HB3 | 56   | LEU  | QD1  | 3.1       | 2402000   |
|        | HB3 | 57   | VAL  | HN   | 5.4       | 44530     |
|        | HB3 | 90   | ASP- | HA   | 6.8       | 121800    |
| HB3    | 90  | ASP- | QB   | 8    | 44875.0*2 |           |
| QD1    | 57  | VAL  | HN   | 7.1  | 345200    |           |
| QD1    | 90  | ASP- | HA   | 6.3  | 531400    |           |
| QD2    | 87  | ILE  | QD1  | 6.7  | 793200    |           |
| 57 VAL | HN  | 57   | VAL  | HA   | 3         | 1816000   |
|        | HN  | 57   | VAL  | HB   | 3.7       | 437900    |
|        | HN  | 57   | VAL  | QG1  | 4.3       | 344400    |
|        | HN  | 57   | VAL  | QG2  | 3.8       | 683400    |
|        | HA  | 57   | VAL  | HB   | 4.4       | 162300    |
|        | HA  | 57   | VAL  | QG1  | 3.7       | 789400    |
|        | HA  | 57   | VAL  | QG2  | 3.3       | 1502000   |
|        | HA  | 58   | VAL  | HA   | 6.2       | 20840     |
|        | HA  | 58   | VAL  | HB   | 4.8       | 95420     |
|        | HA  | 59   | PHE  | CG   | 9         | 30355.0*2 |
|        | HA  | 91   | ALA  | HN   | 4.4       | 367000    |





|        |        |     |      |      |     |            |
|--------|--------|-----|------|------|-----|------------|
| 74 GLY | QD     | 73  | LYS+ | QE   | 5.3 | 713500.0*4 |
|        | HN     | 74  | GLY  | HA1  | 3.9 | 320300     |
|        | HN     | 74  | GLY  | HA2  | 3.8 | 418000     |
|        | HA1    | 75  | GLY  | HN   | 3.7 | 463200     |
|        | HA1    | 77  | LEU  | QD1  | 8   | 71610      |
|        | HA2    | 75  | GLY  | HN   | 3.9 | 334100     |
| 75 GLY | HA2    | 77  | LEU  | QD1  | 8   | 84060      |
|        | HN     | 75  | GLY  | HA1  | 3.7 | 449600     |
|        | HN     | 75  | GLY  | HA2  | 3.5 | 614700     |
|        | HN     | 76  | ILE  | HB   | 6.6 | 13780      |
|        | HN     | 77  | LEU  | QD1  | 8   | 182000     |
|        | HA1    | 76  | ILE  | HN   | 3.5 | 666500     |
|        | HA1    | 76  | ILE  | HB   | 4.8 | 95220      |
|        | HA1    | 76  | ILE  | HG12 | 7   | 24280      |
|        | HA1    | 76  | ILE  | HG13 | 7   | 54640      |
|        | HA1    | 76  | ILE  | QD1  | 8   | 38790      |
|        | HA2    | 76  | ILE  | HN   | 3.7 | 492800     |
|        | HA2    | 76  | ILE  | HB   | 5.3 | 54040      |
|        | HA2    | 76  | ILE  | HG12 | 7   | 44070      |
|        | HA2    | 76  | ILE  | HG13 | 7   | 9343       |
| 76 ILE | HA2    | 76  | ILE  | QD1  | 8   | 63940      |
|        | HN     | 76  | ILE  | HA   | 4.5 | 147300     |
|        | HN     | 76  | ILE  | HB   | 3.8 | 397900     |
|        | HN     | 76  | ILE  | QG2  | 5.1 | 117500     |
|        | HN     | 76  | ILE  | HG12 | 4   | 206000     |
|        | HN     | 76  | ILE  | HG13 | 4.1 | 175200     |
|        | HN     | 76  | ILE  | QD1  | 5.2 | 107400     |
|        | HA     | 76  | ILE  | HB   | 4.1 | 256700     |
|        | HA     | 76  | ILE  | QG2  | 3.7 | 780200     |
|        | HA     | 76  | ILE  | HG12 | 3.7 | 341200     |
|        | HA     | 76  | ILE  | HG13 | 3.3 | 722800     |
|        | HA     | 76  | ILE  | QD1  | 3.7 | 768600     |
|        | HA     | 77  | LEU  | HN   | 3.2 | 1189000    |
|        | HA     | 77  | LEU  | HG   | 6.8 | 120300     |
|        | HA     | 77  | LEU  | QD1  | 8   | 111100     |
|        | HA     | 77  | LEU  | QD2  | 8   | 74010      |
|        | HA     | 78  | ALA  | HN   | 5   | 248900     |
|        | HB     | 76  | ILE  | QG2  | 3.6 | 918300     |
|        | HB     | 76  | ILE  | HG12 | 3.2 | 825900     |
|        | HB     | 76  | ILE  | HG13 | 3.3 | 734600     |
|        | HB     | 76  | ILE  | QD1  | 3.8 | 673400     |
|        | QG2    | 76  | ILE  | HG12 | 3.9 | 554400     |
|        | QG2    | 76  | ILE  | HG13 | 3.9 | 627300     |
|        | QG2    | 76  | ILE  | QD1  | 4.5 | 1131000    |
|        | QG2    | 77  | LEU  | HN   | 6.9 | 378300     |
|        | QG2    | 77  | LEU  | QD2  | 9   | 152500     |
|        | QG2    | 78  | ALA  | HN   | 6.2 | 592400     |
|        | QG2    | 79  | HIS  | HD2  | 7.4 | 287000     |
|        | HG12   | 76  | ILE  | QD1  | 3.3 | 1672000    |
|        | HG13   | 76  | ILE  | QD1  | 3.6 | 1044000    |
|        | QD1    | 77  | LEU  | HN   | 8   | 101000     |
|        | QD1    | 77  | LEU  | QD1  | 9   | 115400     |
|        | QD1    | 77  | LEU  | QD2  | 9   | 93470      |
|        | QD1    | 78  | ALA  | HN   | 8   | 43800      |
|        | QD1    | 79  | HIS  | HB3  | 8   | 42650      |
|        | 77 LEU | HN  | 77   | LEU  | HA  | 4.2        |
| HN     |        | 77  | LEU  | QB   | 5.2 | 131050.0*2 |
| HN     |        | 77  | LEU  | HG   | 4.3 | 136500     |
| HN     |        | 77  | LEU  | QD2  | 5   | 125200     |
| HA     |        | 77  | LEU  | QB   | 4.9 | 324750.0*2 |
| HA     |        | 77  | LEU  | HG   | 3.6 | 444800     |
| HA     |        | 77  | LEU  | QD1  | 3.7 | 858400     |
| HA     |        | 77  | LEU  | QD2  | 4.7 | 196400     |
| QB     |        | 77  | LEU  | HG   | 4.1 | 926500.0*2 |
| QB     |        | 77  | LEU  | QD1  | 5.2 | 354450.0*2 |
| QB     |        | 77  | LEU  | QD2  | 5   | 516000.0*2 |
| QB     |        | 78  | ALA  | HN   | 5.5 | 144850.0*2 |
| QB     |        | 136 | TYR  | HA   | 8   | 100050.0*2 |
| HG     |        | 77  | LEU  | QD1  | 3.8 | 694600     |
| HG     |        | 77  | LEU  | QD2  | 3.8 | 709500     |
| HG     |        | 78  | ALA  | HN   | 6.9 | 119500     |
| HG     |        | 99  | TRP  | HA   | 7   | 61360      |
| QD1    |        | 78  | ALA  | HN   | 8   | 113600     |

|        |     |     |      |      |     |            |
|--------|-----|-----|------|------|-----|------------|
| 78 ALA | QD1 | 108 | LEU  | HA   | 8   | 52350      |
|        | QD2 | 111 | THR  | HA   | 8   | 5272       |
|        | QD2 | 136 | TYR  | HN   | 8   | 42930      |
|        | QD2 | 136 | TYR  | HA   | 8   | 92690      |
|        | QD2 | 136 | TYR  | HB2  | 7.3 | 306600     |
|        | QD2 | 136 | TYR  | HB3  | 7   | 347900     |
|        | QD2 | 136 | TYR  | CG   | 10  | 147600.0*2 |
|        | QD2 | 136 | TYR  | HH   | 8   | 70480      |
|        | HN  | 78  | ALA  | QB   | 4.1 | 471500     |
|        | HN  | 111 | THR  | QG2  | 6.7 | 422300     |
| 79 HIS | HA  | 78  | ALA  | QB   | 3.6 | 1065000    |
|        | HA  | 93  | PHE  | HA   | 4.2 | 469100     |
|        | QB  | 93  | PHE  | HA   | 6.2 | 595800     |
|        | QB  | 93  | PHE  | HB2  | 8   | 58980      |
|        | QB  | 93  | PHE  | HB3  | 8   | 77910      |
|        | QB  | 93  | PHE  | CG   | 10  | 84050.0*2  |
|        | QB  | 94  | ASP- | HA   | 6.5 | 484500     |
|        | QB  | 111 | THR  | HA   | 6.4 | 499900     |
|        | HA  | 79  | HIS  | HB2  | 3.7 | 443700     |
|        | HA  | 79  | HIS  | HB3  | 3.7 | 438600     |
| 80 ALA | HA  | 92  | HIS  | HE1  | 6.8 | 127000     |
|        | HD2 | 92  | HIS  | HA   | 6.2 | 179400     |
|        | HD2 | 92  | HIS  | HB2  | 4.9 | 465500     |
|        | HD2 | 92  | HIS  | HB3  | 4.9 | 449400     |
|        | HD2 | 93  | PHE  | HA   | 6.8 | 126300     |
|        | HD2 | 93  | PHE  | HB2  | 7   | 63700      |
|        | HD2 | 93  | PHE  | HB3  | 7   | 44240      |
|        | HN  | 80  | ALA  | HA   | 3.2 | 1144000    |
|        | HA  | 80  | ALA  | QB   | 3.4 | 1517000    |
|        | HA  | 81  | PHE  | CG   | 9   | 89550.0*2  |
| 81 PHE | HA  | 82  | GLY  | HA1  | 6.6 | 45280      |
|        | HA  | 88  | GLY  | HA2  | 7   | 10610      |
|        | HA  | 115 | GLU- | QG   | 8   | 112500.0*2 |
|        | QB  | 118 | HIS  | HB2  | 6.4 | 516900     |
|        | QB  | 118 | HIS  | HB3  | 6.9 | 387500     |
|        | HA  | 81  | PHE  | QB   | 4.6 | 586500.0*2 |
|        | HA  | 118 | HIS  | HA   | 4.5 | 326700     |
|        | HA  | 118 | HIS  | HE1  | 6.7 | 134200     |
|        | CG  | 87  | ILE  | HB   | 9   | 4767.0*2   |
|        | CG  | 87  | ILE  | QG2  | 10  | 24640.0*2  |
| 82 GLY | CG  | 87  | ILE  | HG12 | 9   | 26225.0*2  |
|        | CG  | 87  | ILE  | HG13 | 9   | 16550.0*2  |
|        | CG  | 87  | ILE  | QD1  | 10  | 54800.0*2  |
|        | CG  | 90  | ASP- | QB   | 10  | 64075.0*4  |
|        | HN  | 82  | GLY  | HA1  | 4   | 284500     |
|        | HN  | 82  | GLY  | HA2  | 3.7 | 468500     |
|        | HA1 | 83  | PRO  | HG3  | 5.6 | 263500     |
|        | HA1 | 83  | PRO  | HD2  | 5.2 | 376400     |
|        | HA1 | 119 | SER  | QB   | 6.8 | 228850.0*2 |
|        | HA2 | 83  | PRO  | HG3  | 7   | 61420      |
| 83 PRO | HA2 | 83  | PRO  | HD2  | 5.2 | 374700     |
|        | HA  | 83  | PRO  | HB2  | 5   | 74870      |
|        | HB2 | 83  | PRO  | HG2  | 5.5 | 29710      |
|        | HB2 | 83  | PRO  | HG3  | 4   | 207400     |
|        | HB2 | 83  | PRO  | HD2  | 6.3 | 13760      |
|        | HB2 | 83  | PRO  | HD3  | 4.8 | 73760      |
|        | HB2 | 84  | GLY  | HN   | 7   | 6895       |
|        | HB3 | 83  | PRO  | HG2  | 6.3 | 14420      |
|        | HB3 | 83  | PRO  | HG3  | 3.9 | 239600     |
|        | HB3 | 83  | PRO  | HD3  | 4.3 | 138700     |
| 84 GLY | HB3 | 84  | GLY  | HN   | 5.9 | 27910      |
|        | HD2 | 84  | GLY  | HA1  | 7   | 80320      |
|        | HD2 | 84  | GLY  | HA2  | 7   | 89210      |
|        | HN  | 84  | GLY  | HA1  | 4.1 | 238800     |
|        | HN  | 84  | GLY  | HA2  | 4.1 | 242900     |
|        | HA1 | 88  | GLY  | HA1  | 4.3 | 592900     |
|        | HA1 | 88  | GLY  | HA2  | 5.6 | 126600     |
|        | HN  | 86  | GLY  | HA1  | 3.8 | 395100     |
|        | HN  | 86  | GLY  | HA2  | 3.8 | 379500     |

|         |     |      |      |     |            |            |
|---------|-----|------|------|-----|------------|------------|
| 87 ILE  | HA1 | 87   | ILE  | HB  | 4.9        | 85340      |
|         | HA1 | 87   | ILE  | QG2 | 8          | 71120      |
|         | HA2 | 87   | ILE  | HB  | 5.3        | 53190      |
|         | HA2 | 87   | ILE  | QG2 | 8          | 88120      |
|         | HN  | 87   | ILE  | HA  | 4.9        | 87130      |
|         | HN  | 87   | ILE  | HB  | 4.3        | 180800     |
|         | HN  | 87   | ILE  | QG2 | 5          | 138300     |
|         | HN  | 87   | ILE  | QD1 | 5.8        | 50660      |
|         | HA  | 87   | ILE  | HB  | 3.4        | 762400     |
|         | HA  | 87   | ILE  | QG2 | 4.5        | 242200     |
| HA      | 87  | ILE  | HG12 | 3.2 | 824600     |            |
| HA      | 87  | ILE  | HG13 | 3.6 | 424000     |            |
| HA      | 87  | ILE  | QD1  | 3.9 | 611900     |            |
| HA      | 88  | GLY  | HN   | 4.4 | 162000     |            |
| HA      | 90  | ASP- | QB   | 7   | 79950.0*2  |            |
| HB      | 87  | ILE  | QG2  | 3.8 | 651000     |            |
| HB      | 87  | ILE  | HG12 | 3.5 | 450900     |            |
| HB      | 87  | ILE  | HG13 | 3   | 1165000    |            |
| HB      | 87  | ILE  | QD1  | 2.8 | 8827000    |            |
| HB      | 88  | GLY  | HN   | 6.9 | 10820      |            |
| QG2     | 87  | ILE  | HG12 | 4.7 | 190700     |            |
| QG2     | 88  | GLY  | HN   | 8   | 151100     |            |
| QG2     | 88  | GLY  | HA1  | 8   | 82770      |            |
| QG2     | 88  | GLY  | HA2  | 8   | 143700     |            |
| QG2     | 90  | ASP- | HA   | 8   | 188500     |            |
| HG12    | 87  | ILE  | QD1  | 3.5 | 1154000    |            |
| HG12    | 90  | ASP- | QB   | 7.3 | 166450.0*2 |            |
| HG13    | 87  | ILE  | QD1  | 3.2 | 1899000    |            |
| HG13    | 90  | ASP- | QB   | 8   | 25875.0*2  |            |
| QD1     | 90  | ASP- | HN   | 7.2 | 311200     |            |
| QD1     | 90  | ASP- | HA   | 8   | 209400     |            |
| QD1     | 90  | ASP- | QB   | 9   | 59800.0*2  |            |
| 88 GLY  | HN  | 88   | GLY  | HA1 | 3.7        | 471600     |
|         | HN  | 88   | GLY  | HA2 | 3.6        | 528600     |
|         | HA1 | 89   | GLY  | HN  | 3.7        | 501400     |
|         | HA2 | 89   | GLY  | HN  | 3.9        | 323400     |
| 89 GLY  | HN  | 89   | GLY  | HA1 | 4          | 280400     |
|         | HN  | 89   | GLY  | HA2 | 4          | 273100     |
| 90 ASP- | HN  | 90   | ASP- | HA  | 3.8        | 412900     |
|         | HN  | 90   | ASP- | QB  | 4.7        | 232750.0*2 |
|         | HA  | 90   | ASP- | QB  | 4.1        | 611000.0*2 |
|         | HA  | 91   | ALA  | HN  | 3.3        | 891900     |
|         | QB  | 91   | ALA  | HN  | 5.3        | 197650.0*2 |
| 91 ALA  | HN  | 91   | ALA  | QB  | 4.3        | 351800     |
|         | HA  | 91   | ALA  | QB  | 3.4        | 1593000    |
|         | HA  | 92   | HIS  | HN  | 3.3        | 1004000    |
|         | HA  | 92   | HIS  | HA  | 5.9        | 28400      |
|         | HA  | 92   | HIS  | HB2 | 5.6        | 37510      |
|         | HA  | 92   | HIS  | HB3 | 5          | 76270      |
|         | HA  | 115  | GLU- | QG  | 8          | 82600.0*2  |
|         | HA  | 118  | HIS  | HB2 | 7          | 68390      |
|         | HA  | 118  | HIS  | HB3 | 7          | 77120      |
|         | QB  | 92   | HIS  | HN  | 4.7        | 222400     |
| QB      | 92  | HIS  | HA   | 5.4 | 93000      |            |
| QB      | 115 | GLU- | QB   | 9   | 166100.0*2 |            |
| 92 HIS  | HN  | 92   | HIS  | HA  | 4.3        | 181300     |
|         | HN  | 92   | HIS  | HB2 | 4.5        | 137500     |
|         | HN  | 92   | HIS  | HB3 | 4.8        | 96920      |
|         | HA  | 92   | HIS  | HB2 | 4.5        | 133400     |
|         | HA  | 92   | HIS  | HB3 | 4.2        | 208800     |
|         | HA  | 92   | HIS  | HD2 | 3.8        | 301400     |
|         | HA  | 93   | PHE  | HN  | 3.4        | 754600     |
|         | HA  | 93   | PHE  | CG  | 9          | 90750.0*2  |
|         | HB2 | 93   | PHE  | HN  | 4.8        | 91540      |
|         | HB2 | 93   | PHE  | CG  | 9          | 50450.0*2  |
| HB3     | 93  | PHE  | HN   | 4.6 | 120700     |            |
| HB3     | 93  | PHE  | CG   | 9   | 53900.0*2  |            |
| 93 PHE  | HN  | 93   | PHE  | HA  | 4.7        | 110600     |
|         | HN  | 93   | PHE  | HB2 | 4.5        | 138200     |
|         | HN  | 93   | PHE  | HB3 | 4.2        | 206700     |

|         |     |     |      |      |           |            |
|---------|-----|-----|------|------|-----------|------------|
| 96 ASP- | HA  | 93  | PHE  | HB2  | 4.2       | 225500     |
|         | HA  | 93  | PHE  | HB3  | 4.1       | 232600     |
|         | HA  | 93  | PHE  | CG   | 5.4       | 119500.0*2 |
|         | HA  | 95  | GLU- | HN   | 5.4       | 156900     |
|         | HB2 | 93  | PHE  | CG   | 6.1       | 199550.0*2 |
|         | HB2 | 95  | GLU- | HN   | 6.7       | 40840      |
|         | HB2 | 108 | LEU  | HA   | 6.4       | 153900     |
|         | HB3 | 93  | PHE  | CG   | 6.3       | 147250.0*2 |
|         | HB3 | 106 | THR  | QG2  | 8         | 111300     |
|         | CG  | 108 | LEU  | QD2  | 9.8       | 228050.0*2 |
| CG      | 116 | ILE | QD1  | 10   | 38475.0*2 |            |
| 97 GLU- | QB  | 97  | GLU- | HB2  | 8         | 51050.0*2  |
|         | QB  | 97  | GLU- | HB3  | 8         | 54200.0*2  |
| 98 PHE  | HN  | 97  | GLU- | HA   | 3.4       | 833400     |
|         | HN  | 97  | GLU- | HB2  | 4.4       | 168200     |
|         | HN  | 97  | GLU- | HB3  | 4.6       | 130500     |
|         | HA  | 97  | GLU- | HB2  | 3.4       | 716500     |
|         | HA  | 97  | GLU- | HB3  | 3.5       | 602200     |
|         | HN  | 98  | PHE  | HA   | 4.3       | 177700     |
|         | HN  | 98  | PHE  | QB   | 5         | 160150.0*2 |
|         | HA  | 98  | PHE  | QB   | 4.6       | 593000.0*2 |
|         | HA  | 99  | TRP  | HN   | 4.4       | 160900     |
|         | HA  | 99  | TRP  | HA   | 4.5       | 136200     |
| 99 TRP  | QB  | 99  | TRP  | HA   | 5.6       | 129600.0*2 |
|         | QB  | 99  | TRP  | HB2  | 7.7       | 133950.0*2 |
|         | QB  | 99  | TRP  | HB3  | 7.9       | 113800.0*2 |
|         | HN  | 99  | TRP  | HA   | 4.1       | 257400     |
|         | HN  | 99  | TRP  | HB2  | 4.4       | 162600     |
|         | HN  | 99  | TRP  | HB3  | 4.4       | 159500     |
|         | HA  | 99  | TRP  | HB2  | 3.9       | 318200     |
|         | HA  | 99  | TRP  | HB3  | 4.1       | 252000     |
|         | HA  | 100 | THR  | HN   | 3.6       | 569700     |
|         | HA  | 106 | THR  | QG2  | 8         | 50140      |
| HA      | 108 | LEU | HB2  | 5.8  | 231100    |            |
| HB2     | 100 | THR | HN   | 4.6  | 129900    |            |
| HB2     | 108 | LEU | HB2  | 5.9  | 221100    |            |
| HB3     | 100 | THR | HN   | 4.6  | 122900    |            |
| HB3     | 108 | LEU | HB2  | 5.8  | 229300    |            |
| HE3     | 105 | GLY | QA   | 8    | 39685.0*2 |            |
| HE3     | 106 | THR | HB   | 7    | 79220     |            |
| HE3     | 106 | THR | QG2  | 8    | 174500    |            |
| HE3     | 108 | LEU | HA   | 4.8  | 516300    |            |
| HE3     | 108 | LEU | HB2  | 7    | 48300     |            |
| HE3     | 108 | LEU | HB3  | 7    | 110300    |            |
| HE3     | 108 | LEU | QD2  | 8    | 187000    |            |
| HZ3     | 110 | LEU | HB2  | 6.6  | 139900    |            |
| HZ3     | 110 | LEU | HB3  | 7    | 93080     |            |
| HZ3     | 111 | THR | HA   | 7    | 88310     |            |
| 100 THR | HA  | 101 | THR  | HB   | 5.1       | 62500      |
|         | HA  | 106 | THR  | HB   | 7         | 83900      |
| 101 THR | HN  | 101 | THR  | HA   | 3.3       | 940000     |
|         | HN  | 101 | THR  | HB   | 5.2       | 58210      |
| 102 HIS | HA  | 110 | LEU  | HN   | 6.1       | 47870      |
|         | HB  | 101 | THR  | QG2  | 3.5       | 1167000    |
|         | HB  | 102 | HIS  | HA   | 5.7       | 33570      |
|         | QG2 | 102 | HIS  | HB2  | 8         | 39280      |
|         | QG2 | 102 | HIS  | HB3  | 8         | 83280      |
|         | HN  | 102 | HIS  | HB2  | 4         | 285100     |
|         | HN  | 102 | HIS  | HB3  | 4.4       | 170900     |
|         | HB2 | 107 | ASN  | HD22 | 7         | 18160      |
|         | HB3 | 107 | ASN  | HD22 | 7         | 12030      |
|         | HE1 | 105 | GLY  | QA   | 8         | 46100.0*2  |
| 103 SER | HN  | 103 | SER  | HA   | 4.5       | 133100     |
|         | HN  | 103 | SER  | HB2  | 5         | 76960      |
|         | HN  | 103 | SER  | HB3  | 4.8       | 93940      |
|         | HN  | 107 | ASN  | QB   | 6.9       | 91400.0*2  |
|         | HA  | 103 | SER  | HB2  | 3.5       | 651400     |
| HA      | 103 | SER | HB3  | 3.6  | 561100    |            |
| HA      | 105 | GLY | HN   | 5.9  | 88700     |            |

|         |      |     |     |      |     |            |
|---------|------|-----|-----|------|-----|------------|
| 104 GLY | HB2  | 105 | GLY | HN   | 7   | 12170      |
|         | HB3  | 105 | GLY | HN   | 7   | 31970      |
|         | HA1  | 105 | GLY | HN   | 3.7 | 429400     |
| 105 GLY | HA1  | 105 | GLY | QA   | 4.7 | 438450.0*2 |
|         | HA2  | 105 | GLY | HN   | 3.7 | 467500     |
|         | HN   | 105 | GLY | QA   | 4.1 | 265400.0*2 |
| 106 THR | QA   | 106 | THR | HN   | 4.6 | 511500.0*2 |
|         | QA   | 106 | THR | HB   | 7.7 | 13175.0*2  |
|         | HN   | 106 | THR | HA   | 4.3 | 177200     |
| 107 ASN | HN   | 106 | THR | HB   | 4   | 309300     |
|         | HA   | 106 | THR | HB   | 4.3 | 180600     |
|         | HA   | 106 | THR | QG2  | 3.7 | 880600     |
| 108 LEU | HA   | 107 | ASN | HN   | 3.4 | 768000     |
|         | HA   | 107 | ASN | QB   | 6.1 | 63750.0*2  |
|         | HB   | 106 | THR | QG2  | 3.5 | 1086000    |
| 109 PHE | HB   | 108 | LEU | HA   | 6.2 | 69050      |
|         | HB   | 136 | TYR | HH   | 7   | 87450      |
|         | QG2  | 107 | ASN | HN   | 8   | 154400     |
| 110 LEU | QG2  | 107 | ASN | HA   | 8   | 83570      |
|         | QG2  | 108 | LEU | HA   | 8   | 130800     |
|         | QG2  | 108 | LEU | QD2  | 8.6 | 262800     |
| 111 THR | QG2  | 111 | THR | HN   | 8   | 50150      |
|         | QG2  | 111 | THR | HA   | 8   | 126300     |
|         | QG2  | 111 | THR | HB   | 6.7 | 422800     |
| 112 ALA | QG2  | 111 | THR | QG2  | 8   | 364200     |
|         | QG2  | 136 | TYR | CG   | 10  | 157750.0*2 |
|         | QG2  | 136 | TYR | HH   | 5.9 | 727100     |
| 113 VAL | HA   | 107 | ASN | QB   | 4.7 | 257500.0*2 |
|         | HA   | 107 | ASN | HD21 | 3.7 | 325200     |
|         | HA   | 107 | ASN | HD22 | 5.2 | 44650      |
| 114 HIS | HA   | 108 | LEU | HN   | 3.3 | 896800     |
|         | HA   | 108 | LEU | HB2  | 5.4 | 46640      |
|         | HA   | 110 | LEU | QD1  | 8   | 94140      |
| 115 ILE | QB   | 107 | ASN | HD21 | 5.5 | 100500.0*2 |
|         | QB   | 108 | LEU | HN   | 5.4 | 164900.0*2 |
|         | QB   | 108 | LEU | HA   | 5.7 | 103200.0*2 |
| 116 THR | QB   | 108 | LEU | HB2  | 7.6 | 136950.0*2 |
|         | QB   | 108 | LEU | HB3  | 8   | 38070.0*2  |
|         | QB   | 108 | LEU | QD2  | 9   | 25830.0*2  |
| 117 THR | QB   | 110 | LEU | HN   | 7.3 | 60400.0*2  |
|         | QB   | 110 | LEU | HG   | 6.2 | 352150.0*2 |
|         | QB   | 110 | LEU | QD1  | 9   | 39690.0*2  |
| 118 THR | QB   | 141 | ILE | HB   | 8   | 71100.0*2  |
|         | HD21 | 141 | ILE | QD1  | 8   | 71230      |
|         | HD22 | 108 | LEU | QD2  | 8   | 152600     |
| 119 THR | HD22 | 110 | LEU | HA   | 7   | 24240      |
|         | HD22 | 111 | THR | HB   | 7   | 83600      |
|         | HD22 | 112 | ALA | QB   | 7   | 352600     |
| 120 THR | HD22 | 141 | ILE | QD1  | 8   | 98890      |
|         | HN   | 108 | LEU | HA   | 4.2 | 213900     |
|         | HN   | 108 | LEU | HB2  | 4.3 | 185100     |
| 121 THR | HN   | 108 | LEU | HB3  | 4.7 | 111900     |
|         | HN   | 108 | LEU | QD2  | 6.3 | 31700      |
|         | HA   | 108 | LEU | HB2  | 4   | 302300     |
| 122 THR | HA   | 108 | LEU | HB3  | 3.7 | 502900     |
|         | HA   | 108 | LEU | QD1  | 4.6 | 203200     |
|         | HA   | 108 | LEU | QD2  | 3.7 | 787200     |
| 123 THR | HA   | 112 | ALA | QB   | 5.1 | 213200     |
|         | HB2  | 108 | LEU | HG   | 3.9 | 235100     |
|         | HB2  | 108 | LEU | QD1  | 4   | 512300     |
| 124 THR | HB2  | 108 | LEU | QD2  | 4.5 | 256800     |
|         | HB2  | 109 | PHE | HN   | 4.7 | 106800     |
|         | HB3  | 108 | LEU | HG   | 4.1 | 181900     |
| 125 THR | HB3  | 108 | LEU | QD1  | 4.1 | 407700     |
|         | HB3  | 108 | LEU | QD2  | 4   | 495900     |
|         | HB3  | 109 | PHE | HN   | 5.6 | 39060      |
| 126 THR | HG   | 108 | LEU | QD1  | 3.3 | 1739000    |
|         | HG   | 108 | LEU | QD2  | 3.4 | 1272000    |
|         | HG   | 109 | PHE | HB3  | 6.9 | 119100     |
| 127 THR | QD1  | 110 | LEU | QD1  | 7.6 | 457800     |
|         | QD2  | 109 | PHE | HN   | 8   | 30570      |
|         | QD2  | 111 | THR | HB   | 8   | 71800      |

|         |     |     |     |     |     |            |
|---------|-----|-----|-----|-----|-----|------------|
| 109 PHE | QD2 | 112 | ALA | HN  | 8   | 41480      |
|         | QD2 | 112 | ALA | QB  | 9   | 202800     |
|         | HN  | 109 | PHE | HB2 | 3.9 | 324500     |
| 110 LEU | HN  | 109 | PHE | HB3 | 3.9 | 319900     |
|         | HA  | 109 | PHE | HB2 | 3.8 | 381000     |
|         | HA  | 109 | PHE | HB3 | 3.5 | 635900     |
| 111 THR | HA  | 141 | ILE | QG1 | 8   | 20285.0*2  |
|         | HB2 | 109 | PHE | CG  | 6   | 211950.0*2 |
|         | HB2 | 109 | PHE | CZ  | 8.1 | 16750.0*2  |
| 112 ALA | HB2 | 110 | LEU | HN  | 4.4 | 166200     |
|         | HB2 | 110 | LEU | HB2 | 7   | 46640      |
|         | HB2 | 141 | ILE | QG2 | 8   | 59430      |
| 113 VAL | HB2 | 141 | ILE | QD1 | 8   | 33710      |
|         | HB3 | 109 | PHE | CG  | 5.9 | 271000.0*2 |
|         | HB3 | 110 | LEU | HN  | 4.3 | 176000     |
| 114 HIS | HB3 | 110 | LEU | HB2 | 7   | 28690      |
|         | HB3 | 141 | ILE | QG2 | 8   | 64670      |
|         | HB3 | 141 | ILE | QD1 | 8   | 42160      |
| 115 ILE | CG  | 110 | LEU | QD1 | 10  | 134300.0*2 |
|         | CG  | 113 | VAL | QG2 | 10  | 69250.0*2  |
|         | CZ  | 110 | LEU | QD1 | 10  | 102250.0*2 |
| 116 THR | CZ  | 113 | VAL | QG2 | 10  | 174800.0*2 |
|         | CZ  | 141 | ILE | QG2 | 10  | 64950.0*2  |
|         | HD1 | 112 | ALA | QB  | 7.4 | 281600     |
| 117 THR | HD1 | 141 | ILE | QD1 | 7.9 | 216400     |
|         | HE1 | 110 | LEU | HG  | 7   | 79330      |
|         | HE1 | 141 | ILE | QD1 | 7.8 | 236300     |
| 118 THR | HE2 | 113 | VAL | QG1 | 6.2 | 568700     |
|         | HE2 | 131 | VAL | QG1 | 7.7 | 241100     |
|         | HN  | 110 | LEU | HA  | 4   | 309400     |
| 119 THR | HN  | 110 | LEU | HB2 | 3.9 | 322600     |
|         | HN  | 110 | LEU | HB3 | 4.1 | 262000     |
|         | HN  | 110 | LEU | HG  | 4.5 | 108100     |
| 120 THR | HN  | 110 | LEU | QD1 | 5.1 | 114400     |
|         | HN  | 111 | THR | HA  | 5.5 | 43600      |
|         | HN  | 111 | THR | HB  | 6.3 | 18050      |
| 121 THR | HN  | 111 | THR | QG2 | 8   | 97620      |
|         | HN  | 112 | ALA | HA  | 6.6 | 44600      |
|         | HN  | 113 | VAL | QG2 | 8   | 28470      |
| 122 ALA | HN  | 131 | VAL | QG1 | 8   | 118000     |
|         | HA  | 110 | LEU | HB2 | 3.4 | 726000     |
|         | HA  | 110 | LEU | HB3 | 3.5 | 605900     |
| 123 VAL | HA  | 110 | LEU | HG  | 4   | 224700     |
|         | HA  | 110 | LEU | QD1 | 3.7 | 847500     |
|         | HA  | 111 | THR | HN  | 5   | 71710      |
| 124 VAL | HA  | 111 | THR | HA  | 4.8 | 98000      |
|         | HA  | 112 | ALA | HN  | 6.8 | 40060      |
|         | HA  | 113 | VAL | HN  | 5.6 | 123500     |
| 125 VAL | HA  | 113 | VAL | QG1 | 8   | 134100     |
|         | HA  | 113 | VAL | QG2 | 7.9 | 220400     |
|         | HA  | 114 | HIS | HN  | 6.4 | 55030      |
| 126 VAL | HA  | 141 | ILE | QG2 | 7.8 | 233400     |
|         | HB2 | 110 | LEU | HG  | 3   | 1358000    |
|         | HB2 | 110 | LEU | QD1 | 3.7 | 852100     |
| 127 VAL | HB2 | 111 | THR | HN  | 4.5 | 143000     |
|         | HB2 | 111 | THR | HB  | 7   | 39950      |
|         | HB2 | 112 | ALA | HA  | 6.8 | 39400      |
| 128 VAL | HB3 | 110 | LEU | HG  | 3.3 | 651500     |
|         | HB3 | 110 | LEU | QD1 | 4.1 | 421900     |
|         | HB3 | 111 | THR | HN  | 4.7 | 106300     |
| 129 VAL | HG  | 110 | LEU | QD1 | 3.2 | 1985000    |
|         | HG  | 111 | THR | HN  | 7   | 65520      |
|         | HG  | 113 | VAL | QG1 | 4.9 | 1474000    |
| 130 VAL | HG  | 114 | HIS | HB3 | 5.7 | 248000     |
|         | HG  | 138 | TYR | HB2 | 7   | 71140      |
|         | HG  | 138 | TYR | CG  | 7.7 | 243100.0*2 |
| 131 VAL | HG  | 139 | VAL | HN  | 4.6 | 606300     |
|         | HG  | 139 | VAL | QG1 | 7.4 | 288000     |
|         | QD1 | 111 | THR | HA  | 8   | 10260      |
| 132 VAL | QD1 | 113 | VAL | QG2 | 9   | 173200     |
|         | QD1 | 136 | TYR | CZ  | 9.5 | 274400.0*2 |
|         | QD1 | 138 | TYR | HA  | 8   | 190400     |
| 133 VAL | QD1 | 141 | ILE | HA  | 8   | 81070      |
|         | QD1 | 141 | ILE | HB  | 8   | 28600      |







|          |     |     |      |      |         |           |
|----------|-----|-----|------|------|---------|-----------|
| 143 THR  | HB3 | 143 | THR  | QG2  | 8       | 176200    |
|          | HN  | 143 | THR  | HA   | 3.8     | 376200    |
|          | HN  | 143 | THR  | HB   | 4.6     | 130800    |
|          | HN  | 144 | PHE  | HA   | 5.6     | 39600     |
|          | HA  | 143 | THR  | QG2  | 3.3     | 1495000   |
|          | HA  | 144 | PHE  | HN   | 4.1     | 241000    |
|          | HB  | 143 | THR  | QG2  | 3.3     | 1546000   |
|          | HB  | 144 | PHE  | HN   | 5       | 70280     |
|          | HB  | 144 | PHE  | HB3  | 7       | 11470     |
|          | QG2 | 144 | PHE  | HB3  | 8       | 181000    |
| 144 PHE  | HN  | 144 | PHE  | HA   | 2.9     | 2225000   |
|          | HN  | 144 | PHE  | HB2  | 3.6     | 595400    |
|          | HN  | 144 | PHE  | HB3  | 3.6     | 546800    |
|          | HA  | 144 | PHE  | HB2  | 4       | 306900    |
|          | HA  | 144 | PHE  | HB3  | 4       | 278300    |
|          | HA  | 145 | ARG+ | HD2  | 5.6     | 260800    |
|          | HA  | 146 | LEU  | HN   | 6.5     | 49430     |
|          | HB2 | 144 | PHE  | CZ   | 7.5     | 29755.0*2 |
|          | HB2 | 146 | LEU  | QD1  | 5.8     | 738500    |
|          | HB3 | 144 | PHE  | CZ   | 7.6     | 29270.0*2 |
| 145 ARG+ | HN  | 145 | ARG+ | HA   | 3.9     | 357800    |
|          | HN  | 145 | ARG+ | HB2  | 4.5     | 147700    |
|          | HN  | 145 | ARG+ | HB3  | 4.1     | 232500    |
|          | HN  | 145 | ARG+ | HG2  | 4.7     | 84800     |
|          | HN  | 145 | ARG+ | HG3  | 4.7     | 85240     |
|          | HA  | 145 | ARG+ | HB2  | 3.4     | 821600    |
|          | HA  | 145 | ARG+ | HB3  | 3.3     | 948900    |
|          | HA  | 145 | ARG+ | HG2  | 4.2     | 166800    |
|          | HA  | 145 | ARG+ | HG3  | 4.2     | 162000    |
|          | HA  | 145 | ARG+ | HD2  | 4       | 205600    |
| 146 LEU  | HA  | 145 | ARG+ | HD3  | 4.6     | 98600     |
|          | HA  | 146 | LEU  | HN   | 3.2     | 1208000   |
|          | HA  | 146 | LEU  | HA   | 4.4     | 152700    |
|          | HB2 | 145 | ARG+ | HG2  | 2.9     | 1399000   |
|          | HB2 | 145 | ARG+ | HG3  | 3       | 1144000   |
|          | HB2 | 145 | ARG+ | HD2  | 3.7     | 347900    |
|          | HB2 | 145 | ARG+ | HD3  | 3.9     | 256800    |
|          | HB2 | 146 | LEU  | HN   | 4.2     | 217100    |
|          | HB3 | 145 | ARG+ | HD2  | 4.5     | 111700    |
|          | HB3 | 145 | ARG+ | HD3  | 3.9     | 258300    |
| 147 THR  | HB3 | 146 | LEU  | HN   | 4.1     | 253600    |
|          | HB3 | 151 | ILE  | HG13 | 6.6     | 138900    |
|          | HG2 | 145 | ARG+ | HD2  | 3.6     | 435800    |
|          | HG2 | 145 | ARG+ | HD3  | 3.6     | 439800    |
|          | HG2 | 146 | LEU  | HN   | 7       | 73770     |
|          | HG2 | 146 | LEU  | HA   | 5.1     | 406800    |
|          | HG3 | 145 | ARG+ | HD2  | 3.2     | 807400    |
|          | HG3 | 145 | ARG+ | HD3  | 3.3     | 711700    |
|          | HG3 | 146 | LEU  | HN   | 7       | 66450     |
|          | HG3 | 151 | ILE  | QD1  | 6.7     | 426500    |
| 148 ALA  | HD3 | 147 | SER  | HA   | 5.5     | 300600    |
|          | HN  | 146 | LEU  | HA   | 3.8     | 371800    |
|          | HN  | 146 | LEU  | HB2  | 4.2     | 223500    |
|          | HN  | 146 | LEU  | HB3  | 4.2     | 228800    |
|          | HA  | 146 | LEU  | HB2  | 4.2     | 205400    |
|          | HA  | 146 | LEU  | HB3  | 4.2     | 209000    |
|          | HA  | 146 | LEU  | HG   | 3.8     | 277100    |
|          | HA  | 146 | LEU  | QD1  | 5.1     | 113000    |
|          | HA  | 146 | LEU  | QD2  | 4.7     | 179900    |
|          | HA  | 147 | SER  | HN   | 3.6     | 528200    |
| 149 ASP- | HA  | 147 | SER  | HA   | 4.4     | 157000    |
|          | HA  | 150 | ASP- | HB2  | 5       | 242800    |
|          | HA  | 151 | ILE  | QD1  | 8       | 97320     |
|          | HB2 | 146 | LEU  | QD1  | 4       | 480300    |
|          | HB2 | 146 | LEU  | QD2  | 3.7     | 752600    |
|          | HB2 | 150 | ASP- | HB2  | 6.4     | 158600    |
|          | HB2 | 154 | ILE  | HG12 | 5       | 419700    |
|          | HB3 | 146 | LEU  | QD1  | 4.3     | 309900    |
|          | HB3 | 146 | LEU  | QD2  | 3.6     | 951500    |
|          | HB3 | 150 | ASP- | HB2  | 6.8     | 124400    |
| 150 ASP- | HB3 | 154 | ILE  | HG12 | 5.2     | 352500    |
|          | HG  | 150 | ASP- | HB2  | 5.8     | 235800    |
|          | HG  | 150 | ASP- | HB3  | 5.9     | 220500    |
|          | QD1 | 148 | ALA  | HA   | 7.3     | 306300    |
|          | QD1 | 150 | ASP- | HB2  | 8       | 112900    |
|          | QD1 | 154 | ILE  | HB   | 6.1     | 606000    |
|          | QD2 | 150 | ASP- | HB2  | 8       | 106900    |
|          | QD2 | 150 | ASP- | HB3  | 8       | 94180     |
|          | QD2 | 151 | ILE  | HA   | 8       | 149400    |
|          | QD2 | 151 | ILE  | HB   | 8       | 14230     |
| 151 ILE  | QD2 | 151 | ILE  | HG12 | 8       | 174200    |
|          | QD2 | 151 | ILE  | HG13 | 8       | 98880     |
|          | QD2 | 154 | ILE  | QG2  | 9       | 151900    |
|          | HN  | 147 | SER  | HA   | 3.6     | 556300    |
|          | HN  | 147 | SER  | HB2  | 4.2     | 212600    |
|          | HN  | 147 | SER  | HB3  | 4       | 304400    |
|          | HN  | 149 | ASP- | HB2  | 6.4     | 56090     |
|          | HN  | 150 | ASP- | HB2  | 6       | 81710     |
|          | HN  | 150 | ASP- | HB3  | 5.8     | 104500    |
|          | HA  | 147 | SER  | HB2  | 3.1     | 1324000   |
| HA       | 147 | SER | HB3  | 3.2  | 1078000 |           |
| 152 ARG+ | HA  | 148 | ALA  | HA   | 4.5     | 151200    |
|          | HA  | 148 | ALA  | QB   | 5.1     | 128700    |
|          | HB2 | 148 | ALA  | HN   | 4.3     | 198100    |
|          | HB2 | 148 | ALA  | QB   | 8       | 139700    |
|          | HB2 | 150 | ASP- | HA   | 5.4     | 152100    |
|          | HB3 | 148 | ALA  | HN   | 4.6     | 127600    |
|          | HB3 | 148 | ALA  | QB   | 8       | 118500    |
|          | HB3 | 150 | ASP- | HA   | 5.4     | 152700    |
|          | HB3 | 150 | ASP- | HB2  | 7       | 49040     |
|          | HB3 | 150 | ASP- | HB3  | 7       | 24530     |
| 153 THR  | HN  | 148 | ALA  | HA   | 3.8     | 423500    |
|          | HN  | 148 | ALA  | QB   | 3.9     | 627800    |
|          | HA  | 148 | ALA  | QB   | 3.2     | 2013000   |
|          | HA  | 151 | ILE  | HN   | 5.3     | 179200    |
|          | HA  | 151 | ILE  | HA   | 5.4     | 150500    |
|          | HA  | 151 | ILE  | HB   | 4.6     | 431100    |
|          | HA  | 151 | ILE  | QG2  | 7.9     | 214100    |
|          | HA  | 151 | ILE  | HG12 | 3.8     | 1271000   |
|          | HA  | 151 | ILE  | QD1  | 7.9     | 222500    |
|          | QB  | 149 | ASP- | HN   | 4.7     | 203800    |
| 154 LEU  | QB  | 149 | ASP- | HA   | 4.7     | 207300    |
|          | QB  | 149 | ASP- | HB2  | 8       | 61080     |
|          | QB  | 149 | ASP- | HB3  | 8       | 33040     |
|          | QB  | 151 | ILE  | HB   | 5.8     | 787700    |
|          | QB  | 151 | ILE  | QG2  | 9       | 151700    |
|          | QB  | 151 | ILE  | QD1  | 7.3     | 548900    |
|          | QB  | 152 | ARG+ | HN   | 6.2     | 68740     |
|          | QB  | 152 | ARG+ | HB3  | 7       | 367100    |
|          | QB  | 152 | ARG+ | QD   | 9       | 28415.0*2 |
|          | HN  | 149 | ASP- | HA   | 3.9     | 354200    |
| 155 THR  | HN  | 149 | ASP- | HB2  | 4.3     | 185900    |
|          | HN  | 149 | ASP- | HB3  | 4.3     | 197600    |
|          | HA  | 149 | ASP- | HB2  | 3.2     | 1032000   |
|          | HA  | 149 | ASP- | HB3  | 3.7     | 445400    |
|          | HA  | 150 | ASP- | HN   | 4.5     | 134000    |
|          | HA  | 152 | ARG+ | HN   | 5.3     | 175200    |
|          | HA  | 152 | ARG+ | HB2  | 4.9     | 276400    |
|          | HA  | 152 | ARG+ | HG2  | 5.1     | 388600    |
|          | HA  | 152 | ARG+ | HG3  | 5.4     | 318300    |
|          | HA  | 152 | ARG+ | QD   | 8       | 55400.0*2 |
| 156 THR  | HB2 | 150 | ASP- | HN   | 4.3     | 181800    |
|          | HB3 | 150 | ASP- | HN   | 4.4     | 152300    |
|          | HB3 | 150 | ASP- | HB3  | 5.4     | 319100    |
|          | HN  | 150 | ASP- | HB2  | 4.3     | 191200    |
|          | HN  | 150 | ASP- | HB3  | 4.2     | 216000    |
|          | HB2 | 151 | ILE  | HN   | 4.2     | 230200    |
|          | HB2 | 154 | ILE  | HG12 | 6.2     | 181800    |
|          | HB3 | 151 | ILE  | HN   | 4.3     | 195600    |
|          | HB3 | 151 | ILE  | QD1  | 8       | 142200    |
|          | HB3 | 154 | ILE  | HG12 | 5.9     | 216400    |
| 157 SER  | HN  | 151 | ILE  | HA   | 3.8     | 422200    |
|          | HN  | 151 | ILE  | HB   | 3.6     | 579400    |
|          | HN  | 151 | ILE  | QG2  | 4.2     | 392500    |
|          | HN  | 151 | ILE  | HG12 | 3.9     | 260600    |

|          |     |     |      |      |     |           |
|----------|-----|-----|------|------|-----|-----------|
| 143 THR  | HB3 | 143 | THR  | QG2  | 8   | 176200    |
|          | HN  | 143 | THR  | HA   | 3.8 | 376200    |
|          | HN  | 143 | THR  | HB   | 4.6 | 130800    |
|          | HN  | 144 | PHE  | HA   | 5.6 | 39600     |
|          | HA  | 143 | THR  | QG2  | 3.3 | 1495000   |
|          | HA  | 144 | PHE  | HN   | 4.1 | 241000    |
|          | HB  | 143 | THR  | QG2  | 3.3 | 1546000   |
|          | HB  | 144 | PHE  | HN   | 5   | 70280     |
|          | HB  | 144 | PHE  | HB3  | 7   | 11470     |
|          | QG2 | 144 | PHE  | HB3  | 8   | 181000    |
| 144 PHE  | HN  | 144 | PHE  | HA   | 2.9 | 2225000   |
|          | HN  | 144 | PHE  | HB2  | 3.6 | 595400    |
|          | HN  | 144 | PHE  | HB3  | 3.6 | 546800    |
|          | HA  | 144 | PHE  | HB2  | 4   | 306900    |
|          | HA  | 144 | PHE  | HB3  | 4   | 278300    |
|          | HA  | 145 | ARG+ | HD2  | 5.6 | 260800    |
|          | HA  | 146 | LEU  | HN   | 6.5 | 49430     |
|          | HB2 | 144 | PHE  | CZ   | 7.5 | 29755.0*2 |
|          | HB2 | 146 | LEU  | QD1  | 5.8 | 738500    |
|          | HB3 | 144 | PHE  | CZ   | 7.6 | 29270.0*2 |
| 145 ARG+ | HN  | 145 | ARG+ | HA   | 3.9 | 357800    |
|          | HN  | 145 | ARG+ | HB2  | 4.5 | 147700    |
|          | HN  | 145 | ARG+ | HB3  | 4.1 | 232500    |
|          | HN  | 145 | ARG+ | HG2  | 4.7 | 84800     |
|          | HN  | 145 | ARG+ | HG3  | 4.7 | 85240     |
|          | HA  | 145 | ARG+ | HB2  | 3.4 | 821600    |
|          | HA  | 145 | ARG+ | HB3  | 3.3 | 948900    |
|          | HA  | 145 | ARG+ | HG2  | 4.2 | 166800    |
|          | HA  | 145 | ARG+ | HG3  | 4.2 | 162000    |
|          | HA  | 145 | ARG+ | HD2  | 4   | 205600    |
| 146 LEU  | HA  | 145 | ARG+ | HD3  | 4.6 | 98600     |
|          | HA  | 146 | LEU  | HN   | 3.2 | 1208000   |
|          | HA  | 146 | LEU  | HA   | 4.4 | 152700    |
|          | HB2 | 145 | ARG+ | HG2  | 2.9 | 1399000   |
|          | HB2 | 145 | ARG+ | HG3  | 3   | 1144000   |
|          | HB2 | 145 | ARG+ | HD2  | 3.7 | 347900    |
|          | HB2 | 145 | ARG+ | HD3  | 3.9 | 256800    |
|          | HB2 | 146 | LEU  | HN   | 4.2 | 217100    |
|          | HB3 | 145 | ARG+ | HD2  | 4.5 | 111700    |
|          | HB3 | 145 | ARG+ | HD3  | 3.9 | 258300    |
| 147 THR  | HB3 | 146 | LEU  | HN   | 4.1 | 253600    |
|          | HB3 | 151 | ILE  | HG13 | 6.6 | 138900    |
|          | HG2 | 145 | ARG+ | HD2  | 3.6 | 435800    |
|          | HG2 | 145 | ARG+ | HD3  | 3.6 | 439800    |
|          | HG2 | 146 | LEU  | HN   | 7   | 73770     |
|          | HG2 | 146 | LEU  | HA   | 5.1 | 406800    |
|          | HG3 | 145 | ARG+ | HD2  | 3.2 | 807400    |
|          | HG3 | 145 | ARG+ | HD3  | 3.3 | 711700    |
|          | HG3 | 146 | LEU  | HN   | 7   | 66450     |
|          | HG3 | 151 | ILE  | QD1  | 6.7 | 426500    |
| 148 ALA  | HD3 | 147 | SER  | HA   | 5.5 | 300600    |
|          | HN  | 146 | LEU  | HA   | 3.8 | 371800    |
|          | HN  | 146 | LEU  | HB2  | 4.2 | 223500    |
|          | HN  | 146 | LEU  | HB3  | 4.2 | 228800    |
|          | HA  | 146 | LEU  | HB2  | 4.2 | 205400    |
|          | HA  | 146 | LEU  | HB3  | 4.2 | 209000    |
|          | HA  | 146 | LEU  | HG   | 3.8 | 277100    |
|          | HA  | 146 | LEU  | QD1  | 5.1 | 113000    |
|          | HA  | 146 | LEU  |      |     |           |









|        |        |     |      |      |        |             |             |     |      |      |        |            |         |
|--------|--------|-----|------|------|--------|-------------|-------------|-----|------|------|--------|------------|---------|
| 34 PHE | HN     | 34  | PHE  | HA   | 4.1    | 652100      | HN          | 41  | THR  | HN   | 5.3    | 455900     |         |
|        | HN     | 34  | PHE  | QB   | 4.4    | 1036000.0*2 | HN          | 43  | LEU  | HN   | 7      | 57640      |         |
|        | HN     | 34  | PHE  | CG   | 6.6    | 227450.0*2  | HA          | 39  | ASN  | HD21 | 3.2    | 2127000    |         |
|        | HN     | 35  | GLN  | HN   | 3.6    | 1396000     | HA          | 39  | ASN  | HD22 | 3.6    | 1091000    |         |
|        | HN     | 35  | GLN  | QB   | 7.6    | 36105.0*2   | QB          | 39  | ASN  | HD21 | 5.7    | 217550.0*2 |         |
|        | HN     | 116 | ILE  | HG13 | 7      | 50480       | QB          | 39  | ASN  | HD22 | 6.1    | 129600.0*2 |         |
|        | HN     | 116 | ILE  | QD1  | 8      | 52460       | QB          | 40  | VAL  | HN   | 5.7    | 274800.0*2 |         |
|        | CG     | 35  | GLN  | HN   | 9      | 38840.0*2   | 40 VAL      | HN  | 40   | VAL  | HA     | 3.7        | 1269000 |
|        | 35 GLN | HN  | 35   | GLN  | HA     | 3.8         | 1063000     | HN  | 40   | VAL  | HB     | 4.6        | 319900  |
|        |        | HN  | 35   | GLN  | QB     | 4.3         | 1304500.0*2 | HN  | 40   | VAL  | QG1    | 4.4        | 488000  |
| HN     |        | 35  | GLN  | HG2  | 4.5    | 284500      | HN          | 40  | VAL  | QG2  | 3.5    | 1960000    |         |
| HN     |        | 35  | GLN  | HE22 | 4.9    | 161800      | HN          | 41  | THR  | HN   | 3.2    | 3053000    |         |
| HN     |        | 36  | VAL  | HN   | 3.8    | 1140000     | HN          | 41  | THR  | QG2  | 5.2    | 537400     |         |
| HN     |        | 37  | TRP  | HN   | 5.7    | 290200      | HA          | 41  | THR  | HN   | 3.8    | 996300     |         |
| HN     |        | 38  | SER  | HN   | 5.3    | 450500      | HB          | 41  | THR  | HN   | 5.8    | 82970      |         |
| QB     |        | 35  | GLN  | HE22 | 5      | 544000.0*2  | QG2         | 41  | THR  | HN   | 4.7    | 778800     |         |
| HE21   |        | 39  | ASN  | HA   | 6.7    | 229000      | 41 THR      | HN  | 41   | THR  | HA     | 4.2        | 611300  |
| HE22   |        | 39  | ASN  | HN   | 5.2    | 796100      | HN          | 41  | THR  | HB   | 5.2    | 161600     |         |
| HE22   | 39     | ASN | HA   | 6.7  | 226000 | HN          | 41          | THR | QG2  | 4    | 823900 |            |         |
| 36 VAL | HN     | 36  | VAL  | HA   | 3.8    | 1112000     | HN          | 42  | PRO  | HA   | 5.4    | 131100     |         |
|        | HN     | 36  | VAL  | HB   | 3.2    | 3023000     | HN          | 43  | LEU  | HN   | 4.5    | 1257000    |         |
|        | HN     | 36  | VAL  | QG1  | 3.4    | 2159000     | 42 PRO      | HA  | 43   | LEU  | HN     | 3.4        | 2041000 |
|        | HN     | 36  | VAL  | QG2  | 4.4    | 459900      | HD2         | 43  | LEU  | HN   | 7      | 100900     |         |
|        | HN     | 37  | TRP  | HN   | 3.6    | 1359000     | 43 LEU      | HN  | 43   | LEU  | HA     | 3.1        | 3531000 |
|        | HN     | 37  | TRP  | HB2  | 5.5    | 115600      | HN          | 43  | LEU  | HB2  | 4.1    | 669100     |         |
|        | HN     | 38  | SER  | HN   | 6      | 204100      | HN          | 43  | LEU  | HB3  | 4.4    | 434100     |         |
|        | HN     | 38  | SER  | HA   | 6.7    | 111100      | HN          | 43  | LEU  | QD1  | 4.3    | 524000     |         |
|        | HN     | 116 | ILE  | QG2  | 6.3    | 246500      | HN          | 43  | LEU  | QD2  | 3.6    | 1545000    |         |
|        | HA     | 37  | TRP  | HN   | 4.2    | 547000      | HN          | 44  | LYS+ | HN   | 4.7    | 300100     |         |
| 37 TRP | HA     | 39  | ASN  | HN   | 6      | 217900      | HA          | 44  | LYS+ | HN   | 3.7    | 1289000    |         |
|        | HA     | 39  | ASN  | HD21 | 7      | 128000      | QD1         | 44  | LYS+ | HN   | 4.8    | 725100     |         |
|        | HA     | 39  | ASN  | HD22 | 7      | 112900      | QD2         | 44  | LYS+ | HN   | 8      | 21290      |         |
|        | HB     | 37  | TRP  | HN   | 3.7    | 1160000     | 44 LYS+     | HN  | 44   | LYS+ | HA     | 4.3        | 478800  |
|        | QG1    | 37  | TRP  | HN   | 5.3    | 490000      | HN          | 44  | LYS+ | QG   | 4.8    | 717000.0*2 |         |
|        | QG1    | 131 | VAL  | HN   | 8      | 57850       | HN          | 44  | LYS+ | QE   | 5.2    | 395250.0*2 |         |
|        | QG2    | 37  | TRP  | HN   | 5.4    | 457100      | 45 PHE      | HN  | 45   | PHE  | HA     | 4.4        | 442000  |
|        | HN     | 37  | TRP  | HA   | 4.1    | 685200      | HN          | 45  | PHE  | HB2  | 4.1    | 715100     |         |
|        | HN     | 37  | TRP  | HB2  | 3.4    | 2175000     | HN          | 45  | PHE  | HB3  | 4.4    | 464700     |         |
|        | HN     | 38  | SER  | HN   | 3.5    | 1623000     | HN          | 45  | PHE  | CG   | 6.3    | 361300.0*2 |         |
| 38 SER | HN     | 38  | SER  | HA   | 4.9    | 231000      | HA          | 46  | SER  | HN   | 3.4    | 2144000    |         |
|        | HN     | 40  | VAL  | HN   | 7      | 49340       | HB2         | 46  | SER  | HN   | 5.6    | 102300     |         |
|        | HN     | 116 | ILE  | QG2  | 6.4    | 230100      | HB3         | 46  | SER  | HN   | 5.1    | 179700     |         |
|        | HB2    | 38  | SER  | HN   | 4.1    | 652300      | CG          | 46  | SER  | HN   | 9      | 100650.0*2 |         |
|        | HB3    | 41  | THR  | HN   | 7      | 83480       | 46 SER      | HN  | 46   | SER  | HA     | 4.5        | 355900  |
|        | HE1    | 113 | VAL  | HA   | 5.4    | 668600      | HN          | 46  | SER  | HB2  | 4.5    | 375900     |         |
|        | HE1    | 113 | VAL  | QG1  | 4.8    | 706200      | HN          | 46  | SER  | HB3  | 4.5    | 378800     |         |
|        | HE1    | 113 | VAL  | QG2  | 5.6    | 402900      | HN          | 47  | LYS+ | HN   | 4.6    | 337500     |         |
|        | HE1    | 114 | HIS  | HN   | 4.9    | 1112000     | HN          | 47  | LYS+ | HA   | 4.9    | 220700     |         |
|        | HE1    | 116 | ILE  | HN   | 7      | 80960       | HN          | 47  | LYS+ | HB3  | 5.1    | 173800     |         |
| 39 ASN | HE1    | 116 | ILE  | HB   | 5.5    | 621900      | HA          | 47  | LYS+ | HN   | 3.2    | 3054000    |         |
|        | HE1    | 117 | GLY  | HN   | 5.7    | 529900      | 47 LYS+     | HN  | 47   | LYS+ | HA     | 3.9        | 842100  |
|        | HE1    | 117 | GLY  | HA1  | 7      | 8699        | HN          | 47  | LYS+ | HB2  | 3.7    | 1324000    |         |
|        | HZ3    | 154 | ILE  | HN   | 7      | 61840       | HN          | 47  | LYS+ | HB3  | 3.7    | 1310000    |         |
|        | HN     | 38  | SER  | HA   | 3.4    | 1997000     | HN          | 48  | ILE  | HN   | 5.4    | 132800     |         |
|        | HN     | 39  | ASN  | HN   | 3.8    | 1111000     | HA          | 48  | ILE  | HN   | 3.4    | 1957000    |         |
|        | HN     | 39  | ASN  | HA   | 5.3    | 135700      | QG          | 57  | VAL  | HN   | 6.9    | 423000.0*2 |         |
|        | HN     | 40  | VAL  | HN   | 7      | 28950       | 48 ILE      | HN  | 48   | ILE  | HA     | 3.6        | 1473000 |
|        | HN     | 41  | THR  | HN   | 7      | 25790       | HN          | 48  | ILE  | HB   | 4.3    | 495600     |         |
|        | HN     | 45  | PHE  | HN   | 6.5    | 61150       | HN          | 48  | ILE  | HG13 | 3.1    | 2748000    |         |
| 39 ASN | HA     | 39  | ASN  | HN   | 3.6    | 1553000     | HN          | 49  | ASN  | HA   | 4.5    | 382300     |         |
|        | HA     | 45  | PHE  | HN   | 4.2    | 868100      | HG13        | 50  | THR  | HN   | 7      | 83440      |         |
|        | HB2    | 40  | VAL  | HN   | 5.5    | 373700      | QD1         | 51  | GLY  | HN   | 5.5    | 439700     |         |
|        | HB2    | 41  | THR  | HN   | 5.8    | 250000      | 49 ASN      | HN  | 49   | ASN  | HA     | 3          | 4713000 |
|        | HB3    | 44  | LYS+ | HN   | 6.5    | 266000      | HN          | 50  | THR  | HA   | 5.1    | 180700     |         |
|        | HN     | 39  | ASN  | HA   | 3      | 4700000     | HA          | 49  | ASN  | HD21 | 5.6    | 68410      |         |
|        | HN     | 39  | ASN  | QB   | 4.2    | 1428000.0*2 | HA          | 49  | ASN  | HD22 | 5.8    | 60150      |         |
|        | HN     | 39  | ASN  | HD21 | 6.1    | 43020       | HA          | 50  | THR  | HN   | 3.6    | 1456000    |         |
|        | HN     | 39  | ASN  | HD22 | 5.1    | 133600      |             |     |      |      |        |            |         |
|        | HN     | 40  | VAL  | HN   | 3.7    | 1155000     |             |     |      |      |        |            |         |
| HN     | 40     | VAL | QG2  | 5.3  | 507500 |             |             |     |      |      |        |            |         |

|         |     |      |      |      |         |            |         |     |      |      |           |            |            |
|---------|-----|------|------|------|---------|------------|---------|-----|------|------|-----------|------------|------------|
| 50 THR  | HA  | 51   | GLY  | HN   | 6.3     | 151200     | 59 PHE  | HN  | 92   | HIS  | HA        | 4.7        | 458300     |
|         | QB  | 50   | THR  | HN   | 7.2     | 52750.0*2  |         | HN  | 93   | PHE  | HN        | 4.3        | 766600     |
|         | HN  | 50   | THR  | HA   | 3.3     | 2605000    |         | HN  | 93   | PHE  | CG        | 9          | 106900.0*2 |
|         | HA  | 51   | GLY  | HN   | 3.1     | 3322000    |         | HA  | 59   | PHE  | HN        | 3.3        | 2708000    |
| 51 GLY  | QG2 | 51   | GLY  | HN   | 6.3     | 252600     | HB      | 59  | PHE  | HN   | 5.6       | 95800      |            |
|         | HN  | 51   | GLY  | HA1  | 3.2     | 3290000    | QG1     | 59  | PHE  | HN   | 4.5       | 923400     |            |
|         | HN  | 51   | GLY  | HA2  | 4.1     | 665900     | QG1     | 60  | ALA  | HN   | 7.7       | 110700     |            |
| 52 MET  | HN  | 53   | ALA  | HN   | 6.3     | 159200     | HN      | 59  | PHE  | HA   | 5.4       | 132500     |            |
|         | HN  | 52   | MET  | HA   | 4.3     | 478100     | HN      | 59  | PHE  | HB2  | 3.8       | 1144000    |            |
|         | HN  | 52   | MET  | QB   | 5.4     | 245050.0*2 | HN      | 59  | PHE  | HB3  | 4         | 723000     |            |
| 53 ALA  | HN  | 52   | MET  | QG   | 5.5     | 270550.0*2 | HN      | 59  | PHE  | CG   | 6.9       | 152300.0*2 |            |
|         | HN  | 53   | ALA  | HN   | 4.6     | 351700     | HN      | 60  | ALA  | HN   | 4.5       | 403300     |            |
|         | QB  | 53   | ALA  | HN   | 6.1     | 187000.0*2 | HN      | 60  | ALA  | HA   | 5.1       | 187500     |            |
|         | QG  | 53   | ALA  | HN   | 8       | 61000.0*2  | HN      | 60  | ALA  | QB   | 5.7       | 71700      |            |
|         | HN  | 53   | ALA  | HA   | 3.3     | 2530000    | HN      | 93  | PHE  | HB3  | 7         | 46730      |            |
|         | HN  | 53   | ALA  | QB   | 3.6     | 1171000    | HA      | 60  | ALA  | HN   | 3.7       | 1318000    |            |
|         | HN  | 54   | ASP- | HA   | 5.1     | 176900     | HA      | 93  | PHE  | HN   | 4.8       | 384400     |            |
| 54 ASP- | QB  | 54   | ASP- | HN   | 3.5     | 1366000    | HB3     | 60  | ALA  | HN   | 5.7       | 93990      |            |
|         | HN  | 54   | ASP- | HA   | 3.4     | 1907000    | CG      | 60  | ALA  | HN   | 9         | 15985.0*2  |            |
|         | HN  | 54   | ASP- | HB2  | 3.8     | 1129000    | HN      | 60  | ALA  | HA   | 4.7       | 295100     |            |
| 55 ILE  | HN  | 54   | ASP- | HB3  | 5.2     | 165500     | HN      | 60  | ALA  | QB   | 4.1       | 507900     |            |
|         | HN  | 55   | ILE  | HN   | 4       | 817800     | HN      | 61  | ARG+ | HN   | 4.5       | 358800     |            |
|         | HN  | 55   | ILE  | HG12 | 5.4     | 652400     | HN      | 62  | GLY  | HN   | 6.4       | 148600     |            |
|         | HN  | 56   | LEU  | HN   | 6.5     | 131900     | HN      | 93  | PHE  | HB2  | 7         | 107900     |            |
|         | HA  | 55   | ILE  | HN   | 4.9     | 225300     | HN      | 93  | PHE  | HB3  | 5.4       | 639000     |            |
|         | HB2 | 55   | ILE  | HN   | 4.3     | 510500     | HA      | 61  | ARG+ | HN   | 3.4       | 2088000    |            |
|         | HB2 | 56   | LEU  | HN   | 6.3     | 159700     | QB      | 61  | ARG+ | HN   | 3.5       | 1446000    |            |
|         | HB3 | 55   | ILE  | HN   | 4.7     | 278600     | 61 ARG+ | HN  | 61   | ARG+ | HA        | 4.6        | 345200     |
|         | HN  | 55   | ILE  | HA   | 4.8     | 264000     | HN      | 61  | ARG+ | HB2  | 4.2       | 611300     |            |
|         | HN  | 55   | ILE  | HB   | 4.2     | 591300     | HN      | 61  | ARG+ | HB3  | 3.9       | 918900     |            |
| 56 LEU  | HN  | 55   | ILE  | QG2  | 4.2     | 604100     | HN      | 61  | ARG+ | QG   | 5         | 512500.0*2 |            |
|         | HN  | 55   | ILE  | HG12 | 4.4     | 288300     | HN      | 61  | ARG+ | QD   | 6.1       | 127200.0*2 |            |
|         | HN  | 56   | LEU  | HB3  | 5.4     | 126900     | HN      | 62  | GLY  | HN   | 4.3       | 507800     |            |
|         | HA  | 56   | LEU  | HN   | 3.5     | 1874000    | HA      | 62  | GLY  | HN   | 4.7       | 299100     |            |
|         | HA  | 90   | ASP- | HN   | 4.8     | 368700     | HB2     | 62  | GLY  | HN   | 5         | 200000     |            |
|         | HA  | 91   | ALA  | HN   | 7       | 36970      | HB3     | 62  | GLY  | HN   | 5         | 191300     |            |
|         | QG2 | 89   | GLY  | HN   | 6.9     | 174700     | 62 GLY  | HN  | 62   | GLY  | HA1       | 4          | 763900     |
|         | QG2 | 90   | ASP- | HN   | 7.8     | 101700     | HN      | 62  | GLY  | HA2  | 4         | 738500     |            |
|         | QD1 | 90   | ASP- | HN   | 8       | 57190      | HN      | 64  | HIS  | HB3  | 6.5       | 130600     |            |
|         | HN  | 56   | LEU  | HA   | 4.6     | 316900     | HN      | 71  | ASP- | HA   | 5.8       | 122400     |            |
|         | HN  | 56   | LEU  | HB2  | 4       | 785700     | HN      | 96  | ASP- | HA   | 6.4       | 70640      |            |
|         | HN  | 56   | LEU  | HB3  | 3.9     | 965800     | HA1     | 71  | ASP- | HN   | 4.6       | 530400     |            |
|         | HN  | 56   | LEU  | QD2  | 4.4     | 461600     | HA1     | 72  | GLY  | HN   | 5.9       | 110400     |            |
|         | HN  | 57   | VAL  | HN   | 5       | 193100     | HA2     | 63  | ALA  | HN   | 7         | 14660      |            |
|         | HN  | 90   | ASP- | HN   | 5.6     | 155500     | HA2     | 71  | ASP- | HN   | 6.2       | 84290      |            |
| HN      | 90  | ASP- | HA   | 4.1  | 1012000 | HA2        | 72      | GLY | HN   | 6.1  | 90020     |            |            |
| 57 VAL  | HN  | 91   | ALA  | HN   | 6       | 98680      | 67 ASP- | HN  | 67   | ASP- | HA        | 4.1        | 637400     |
|         | HN  | 91   | ALA  | QB   | 6.7     | 197200     | HN      | 67  | ASP- | QB   | 4.9       | 505000.0*2 |            |
|         | HA  | 57   | VAL  | HN   | 3.5     | 1751000    | HN      | 68  | HIS  | HN   | 5.4       | 125900     |            |
|         | HB2 | 57   | VAL  | HN   | 4.2     | 596700     | HN      | 68  | HIS  | HA   | 5         | 204000     |            |
|         | HB2 | 91   | ALA  | HN   | 7       | 79460      | HN      | 68  | HIS  | HE1  | 7         | 59520      |            |
|         | HB3 | 57   | VAL  | HN   | 4.5     | 397200     | HN      | 69  | ALA  | HN   | 6.1       | 193600     |            |
|         | HB3 | 91   | ALA  | HN   | 6.9     | 188800     | HA      | 68  | HIS  | HN   | 4         | 810400     |            |
|         | HN  | 57   | VAL  | HA   | 3.4     | 2190000    | 68 HIS  | HN  | 68   | HIS  | HA        | 3.6        | 1469000    |
|         | HN  | 57   | VAL  | HB   | 3.8     | 1025000    | HN      | 68  | HIS  | HB2  | 4.3       | 482300     |            |
|         | HN  | 57   | VAL  | QG1  | 4.3     | 545700     | HN      | 68  | HIS  | HB3  | 4         | 722900     |            |
|         | HN  | 57   | VAL  | QG2  | 3.5     | 2005000    | HN      | 68  | HIS  | HD2  | 4.7       | 205100     |            |
|         | HN  | 90   | ASP- | QB   | 8       | 34655.0*2  | HN      | 68  | HIS  | HE1  | 6.1       | 42240      |            |
| 58 VAL  | HA  | 58   | VAL  | HN   | 3.3     | 2296000    | HN      | 69  | ALA  | HN   | 4.2       | 613800     |            |
|         | HA  | 91   | ALA  | HN   | 4.9     | 349700     | HN      | 70  | PHE  | HN   | 6.7       | 104400     |            |
|         | QG1 | 58   | VAL  | HN   | 5       | 600000     | 69 ALA  | HN  | 69   | ALA  | HA        | 3.9        | 891600     |
|         | QG2 | 58   | VAL  | HN   | 5       | 603700     | HN      | 69  | ALA  | QB   | 3.4       | 1651000    |            |
|         | QG2 | 59   | PHE  | HN   | 4.8     | 730500     | HN      | 70  | PHE  | HA   | 5.7       | 87020      |            |
|         | HN  | 58   | VAL  | HA   | 4.4     | 421000     | HA      | 70  | PHE  | HN   | 3.6       | 1533000    |            |
|         | HN  | 58   | VAL  | HB   | 4       | 821800     | QB      | 70  | PHE  | HN   | 3.8       | 923300     |            |
|         | HN  | 58   | VAL  | QG1  | 4.5     | 420900     | 70 PHE  | HN  | 70   | PHE  | HA        | 3.7        | 1308000    |
|         | HN  | 59   | PHE  | HN   | 4.8     | 245700     | HN      | 70  | PHE  | HB2  | 4.1       | 671200     |            |
|         | HN  | 59   | PHE  | CG   | 9       | 151750.0*2 | HN      | 70  | PHE  | HB3  | 4.1       | 667700     |            |
|         |     |      |      |      |         | HN         | 70      | PHE | CG   | 7.8  | 59400.0*2 |            |            |

|         |     |     |      |      |     |            |
|---------|-----|-----|------|------|-----|------------|
| 71 ASP- | HN  | 71  | ASP- | HA   | 5.6 | 101400     |
|         | CG  | 71  | ASP- | HN   | 9   | 16605.0*2  |
|         | CZ  | 71  | ASP- | HN   | 9   | 89400.0*2  |
|         | HN  | 71  | ASP- | HA   | 3.5 | 1677000    |
|         | HN  | 71  | ASP- | HB2  | 4.1 | 709100     |
|         | HN  | 71  | ASP- | HB3  | 4.5 | 376200     |
|         | HN  | 72  | GLY  | HN   | 4.3 | 480500     |
|         | HA  | 72  | GLY  | HN   | 3.3 | 2464000    |
|         | HA  | 73  | LYS+ | HN   | 7   | 31950      |
|         | HB2 | 72  | GLY  | HN   | 5.2 | 167200     |
| 72 GLY  | HB3 | 72  | GLY  | HN   | 5.1 | 184500     |
|         | HB3 | 74  | GLY  | HN   | 7   | 13240      |
|         | HN  | 72  | GLY  | HA1  | 3.8 | 1029000    |
|         | HN  | 72  | GLY  | HA2  | 3.9 | 875200     |
| 73 LYS+ | HA1 | 73  | LYS+ | HN   | 4   | 818500     |
|         | HA2 | 73  | LYS+ | HN   | 4   | 743100     |
|         | HN  | 73  | LYS+ | HA   | 3.4 | 2064000    |
|         | HN  | 73  | LYS+ | QB   | 4.7 | 712500.0*2 |
| 74 GLY  | HN  | 74  | GLY  | HA1  | 5.5 | 108900     |
|         | HN  | 98  | PHE  | QB   | 8   | 158600.0*2 |
|         | QB  | 74  | GLY  | HN   | 5.8 | 260600.0*2 |
|         | HG2 | 74  | GLY  | HN   | 5.7 | 525800     |
|         | HN  | 74  | GLY  | HA1  | 3.9 | 914500     |
|         | HN  | 74  | GLY  | HA2  | 3.2 | 2908000    |
| 75 GLY  | HN  | 77  | LEU  | QD1  | 8   | 79610      |
|         | HA1 | 75  | GLY  | HN   | 3.7 | 1268000    |
|         | HA2 | 75  | GLY  | HN   | 3.7 | 1299000    |
|         | HN  | 75  | GLY  | HA1  | 3.4 | 2067000    |
|         | HN  | 75  | GLY  | HA2  | 3.3 | 2374000    |
|         | HN  | 76  | ILE  | HN   | 5   | 205400     |
| 76 ILE  | HN  | 76  | ILE  | HA   | 5.8 | 78780      |
|         | HA1 | 76  | ILE  | HN   | 4.1 | 633400     |
|         | HA2 | 76  | ILE  | HN   | 4.4 | 446800     |
|         | HN  | 76  | ILE  | HA   | 3.9 | 950100     |
|         | HN  | 76  | ILE  | HB   | 4   | 803000     |
|         | HN  | 76  | ILE  | QG2  | 4.9 | 266700     |
|         | HN  | 76  | ILE  | HG12 | 4.2 | 394900     |
|         | HN  | 76  | ILE  | HG13 | 4.8 | 177000     |
|         | HN  | 76  | ILE  | QD1  | 5.8 | 90060      |
|         | HN  | 77  | LEU  | HN   | 5.6 | 99290      |
| 77 LEU  | HN  | 77  | LEU  | QB   | 6.8 | 80450.0*2  |
|         | HA  | 77  | LEU  | HN   | 3.5 | 1738000    |
|         | HA  | 78  | ALA  | HN   | 5.5 | 356700     |
|         | HB  | 77  | LEU  | HN   | 5.2 | 153600     |
|         | HB  | 78  | ALA  | HN   | 7   | 60270      |
|         | QG2 | 77  | LEU  | HN   | 4.3 | 1145000    |
|         | QG2 | 78  | ALA  | HN   | 3.8 | 1799000    |
|         | QD1 | 77  | LEU  | HN   | 6.3 | 240000     |
|         | HN  | 77  | LEU  | HA   | 4.6 | 342300     |
|         | HN  | 77  | LEU  | QB   | 4.9 | 535000.0*2 |
| 78 ALA  | HN  | 77  | LEU  | HG   | 4.4 | 324000     |
|         | HN  | 77  | LEU  | QD1  | 4.7 | 317500     |
|         | HN  | 77  | LEU  | QD2  | 5   | 238900     |
|         | HN  | 78  | ALA  | HN   | 3.6 | 1452000    |
|         | HN  | 78  | ALA  | QB   | 5.6 | 79700      |
|         | HN  | 79  | HIS  | HN   | 6.8 | 100500     |
|         | HA  | 78  | ALA  | HN   | 4.3 | 502600     |
|         | QB  | 94  | ASP- | HN   | 7.1 | 364600.0*2 |
|         | HG  | 78  | ALA  | HN   | 5.8 | 477400     |
|         | QD1 | 78  | ALA  | HN   | 7.7 | 109800     |
| 79 HIS  | QD2 | 78  | ALA  | HN   | 7.9 | 96840      |
|         | QD2 | 99  | TRP  | HE1  | 8   | 93570      |
|         | QD2 | 136 | TYR  | HN   | 8   | 60820      |
|         | HN  | 78  | ALA  | HA   | 3.9 | 853600     |
|         | HN  | 78  | ALA  | QB   | 3.5 | 1415000    |
|         | HN  | 79  | HIS  | HN   | 6.8 | 32210      |
|         | HN  | 79  | HIS  | HE1  | 7   | 86700      |
|         | HN  | 111 | THR  | QG2  | 5.4 | 459000     |
|         | QB  | 79  | HIS  | HN   | 3.7 | 1082000    |

|         |        |     |      |      |     |             |         |
|---------|--------|-----|------|------|-----|-------------|---------|
| 79 HIS  | HN     | 79  | HIS  | HA   | 3.5 | 1619000     |         |
|         | HN     | 79  | HIS  | HB2  | 5.3 | 143000      |         |
|         | HN     | 79  | HIS  | HB3  | 5.1 | 176200      |         |
|         | HN     | 79  | HIS  | HD2  | 3.9 | 688500      |         |
|         | HN     | 80  | ALA  | HN   | 6.2 | 52140       |         |
|         | HN     | 93  | PHE  | HA   | 5.3 | 204600      |         |
|         | HN     | 93  | PHE  | CG   | 9   | 115400.0*2  |         |
|         | HN     | 94  | ASP- | HA   | 6.4 | 70200       |         |
|         | HN     | 115 | GLU- | QG   | 8   | 71700.0*2   |         |
|         | HA     | 80  | ALA  | HN   | 3.2 | 3202000     |         |
| 80 ALA  | HA     | 92  | HIS  | HN   | 5   | 286300      |         |
|         | HD2    | 92  | HIS  | HN   | 7   | 123000      |         |
|         | HD2    | 93  | PHE  | HN   | 7   | 99720       |         |
|         | HN     | 80  | ALA  | HA   | 3.5 | 1645000     |         |
|         | HN     | 80  | ALA  | QB   | 3.6 | 1154000     |         |
|         | HN     | 81  | PHE  | HN   | 4.8 | 262400      |         |
|         | HN     | 82  | GLY  | HN   | 6.9 | 92380       |         |
|         | HN     | 118 | HIS  | HB2  | 5.5 | 635100      |         |
|         | QB     | 118 | HIS  | HN   | 5.2 | 520600      |         |
|         | QB     | 119 | SER  | HN   | 4.2 | 1241000     |         |
| 81 PHE  | HN     | 90  | ASP- | HN   | 4.5 | 539500      |         |
|         | CG     | 90  | ASP- | HN   | 9   | 36400.0*2   |         |
| 82 GLY  | HN     | 82  | GLY  | HA1  | 3.9 | 899000      |         |
|         | HN     | 82  | GLY  | HA2  | 4.3 | 493900      |         |
|         | HN     | 83  | PRO  | HD2  | 6.5 | 269300      |         |
|         | HN     | 89  | GLY  | HN   | 4.2 | 899600      |         |
|         | HA1    | 121 | GLY  | HN   | 5.2 | 244800      |         |
| 83 PRO  | HA1    | 122 | LEU  | HN   | 5   | 301500      |         |
|         | HB2    | 84  | GLY  | HN   | 5.5 | 109300      |         |
|         | HB3    | 84  | GLY  | HN   | 5.1 | 188100      |         |
|         | HG3    | 84  | GLY  | HN   | 7   | 138100      |         |
|         | HD2    | 84  | GLY  | HN   | 5.7 | 494600      |         |
| 84 GLY  | HD3    | 84  | GLY  | HN   | 5.2 | 844000      |         |
|         | HN     | 84  | GLY  | HA1  | 4.4 | 419500      |         |
|         | HN     | 84  | GLY  | HA2  | 4.3 | 534500      |         |
|         | HN     | 85  | SER  | HN   | 4.5 | 366900      |         |
|         | HN     | 85  | SER  | HA   | 5.2 | 166100      |         |
| 85 SER  | HA1    | 85  | SER  | HN   | 7   | 12560       |         |
|         | HN     | 85  | SER  | HA   | 4.2 | 543700      |         |
|         | HN     | 88  | GLY  | HA1  | 7   | 53900       |         |
| 86 GLY  | HN     | 87  | ILE  | HB   | 6.7 | 33120       |         |
|         | HN     | 87  | ILE  | QG2  | 5.5 | 122200      |         |
|         | HN     | 88  | GLY  | HN   | 4.8 | 272800      |         |
|         | HN     | 88  | GLY  | HA1  | 5.4 | 127700      |         |
|         | HA     | 88  | GLY  | HN   | 4.4 | 408200      |         |
|         | HB     | 88  | GLY  | HN   | 6.4 | 43260       |         |
|         | HB     | 90  | ASP- | HN   | 7   | 38500       |         |
|         | QG2    | 88  | GLY  | HN   | 5   | 647200      |         |
|         | QG2    | 90  | ASP- | HN   | 8   | 54970       |         |
|         | 88 GLY | HN  | 88   | GLY  | HA1 | 3.8         | 1145000 |
| HN      |        | 88  | GLY  | HA2  | 3.6 | 1555000     |         |
| HN      |        | 90  | ASP- | HN   | 5.5 | 343200      |         |
| HA1     |        | 89  | GLY  | HN   | 3.4 | 2126000     |         |
| HA1     |        | 90  | ASP- | HN   | 6.6 | 121400      |         |
| HA2     |        | 89  | GLY  | HN   | 3.6 | 1479000     |         |
| 89 GLY  |        | HN  | 89   | GLY  | HA1 | 3.7         | 1310000 |
|         |        | HN  | 89   | GLY  | HA2 | 3.5         | 1696000 |
|         |        | HN  | 90   | ASP- | HN  | 4.6         | 348200  |
|         |        | HN  | 90   | ASP- | HA  | 5.5         | 114800  |
| 90 ASP- | HN     | 90  | ASP- | HA   | 4   | 765800      |         |
|         | HN     | 90  | ASP- | QB   | 4.3 | 1194000.0*2 |         |
|         | HN     | 91  | ALA  | HN   | 4.7 | 281900      |         |
|         | HA     | 91  | ALA  | HN   | 3.6 | 1493000     |         |
|         | QB     | 91  | ALA  | HN   | 5.6 | 336800.0*2  |         |
| 91 ALA  |        |     |      |      |     |             |         |

|         |     |     |      |     |     |            |
|---------|-----|-----|------|-----|-----|------------|
|         | HN  | 91  | ALA  | HA  | 3.7 | 1334000    |
|         | HN  | 91  | ALA  | QB  | 3.4 | 1631000    |
|         | HN  | 92  | HIS  | HN  | 5.4 | 127900     |
|         | HN  | 92  | HIS  | HD2 | 7   | 119300     |
|         | HA  | 92  | HIS  | HN  | 3.7 | 1235000    |
|         | QB  | 92  | HIS  | HN  | 4.6 | 259300     |
|         | QB  | 93  | PHE  | HN  | 8   | 14600      |
| 92 HIS  |     |     |      |     |     |            |
|         | HN  | 92  | HIS  | HA  | 6.6 | 38010      |
|         | HN  | 92  | HIS  | HB2 | 5.7 | 86590      |
|         | HN  | 92  | HIS  | HD2 | 6.3 | 33790      |
|         | HN  | 93  | PHE  | HN  | 4.6 | 319700     |
|         | HN  | 93  | PHE  | CG  | 9   | 34170.0*2  |
|         | HN  | 94  | ASP- | HN  | 7   | 54590      |
|         | HA  | 93  | PHE  | HN  | 3.9 | 894900     |
|         | HB3 | 93  | PHE  | HN  | 5.8 | 78920      |
|         | HD2 | 93  | PHE  | HN  | 7   | 136800     |
| 93 PHE  |     |     |      |     |     |            |
|         | HN  | 93  | PHE  | HA  | 6.8 | 30440      |
|         | HN  | 93  | PHE  | HB2 | 5.2 | 163500     |
|         | HN  | 93  | PHE  | HB3 | 4.5 | 369600     |
|         | HN  | 93  | PHE  | CG  | 6.5 | 276150.0*2 |
|         | HN  | 94  | ASP- | HN  | 4.6 | 337500     |
|         | HA  | 94  | ASP- | HN  | 3.5 | 1722000    |
|         | HB2 | 94  | ASP- | HN  | 4   | 735400     |
|         | HB3 | 94  | ASP- | HN  | 4.1 | 650000     |
|         | CG  | 115 | GLU- | HN  | 9   | 35525.0*2  |
| 94 ASP- |     |     |      |     |     |            |
|         | HN  | 94  | ASP- | HA  | 3.5 | 1871000    |
|         | HN  | 95  | GLU- | QB  | 7.5 | 39480.0*2  |
|         | HA  | 95  | GLU- | HN  | 4   | 774700     |
|         | HA  | 99  | TRP  | HE1 | 7   | 55850      |
| 95 GLU- |     |     |      |     |     |            |
|         | HN  | 95  | GLU- | HA  | 3.6 | 1556000    |
|         | HN  | 95  | GLU- | QB  | 4.8 | 548500.0*2 |
|         | HN  | 96  | ASP- | HN  | 3   | 4460000    |
| 96 ASP- |     |     |      |     |     |            |
|         | HA  | 97  | GLU- | HN  | 3.6 | 1432000    |
| 97 GLU- |     |     |      |     |     |            |
|         | HN  | 97  | GLU- | HA  | 3.9 | 855100     |
|         | HN  | 97  | GLU- | HB2 | 4.7 | 294400     |
|         | HN  | 97  | GLU- | HB3 | 4.5 | 358400     |
|         | HN  | 98  | PHE  | HN  | 4.6 | 339800     |
|         | HN  | 98  | PHE  | HA  | 7   | 20960      |
|         | HN  | 99  | TRP  | HN  | 5.8 | 271100     |
|         | HB2 | 98  | PHE  | HN  | 5.2 | 149300     |
|         | HB3 | 98  | PHE  | HN  | 4.6 | 338200     |
| 98 PHE  |     |     |      |     |     |            |
|         | HN  | 98  | PHE  | HA  | 3.7 | 1272000    |
|         | HN  | 98  | PHE  | QB  | 4.7 | 657000.0*2 |
|         | HN  | 99  | TRP  | HN  | 4.1 | 699200     |
|         | HN  | 99  | TRP  | HA  | 4.9 | 226300     |
|         | HN  | 99  | TRP  | HE1 | 7   | 59780      |
|         | HN  | 100 | THR  | HN  | 6.7 | 111000     |
|         | HA  | 99  | TRP  | HN  | 4.9 | 229500     |
|         | QB  | 99  | TRP  | HN  | 5.2 | 611500.0*2 |
| 99 TRP  |     |     |      |     |     |            |
|         | HN  | 99  | TRP  | HA  | 4   | 797200     |
|         | HN  | 99  | TRP  | HB2 | 4.6 | 328900     |
|         | HN  | 99  | TRP  | HB3 | 4.2 | 551400     |
|         | HN  | 99  | TRP  | HE1 | 5.3 | 105300     |
|         | HN  | 100 | THR  | HN  | 5.9 | 76700      |
|         | HB2 | 100 | THR  | HN  | 4.3 | 532700     |
|         | HB3 | 100 | THR  | HN  | 3.8 | 1075000    |
|         | HE3 | 108 | LEU  | HN  | 7   | 143800     |
|         | HE1 | 108 | LEU  | QD1 | 5   | 601100     |
|         | HZ3 | 107 | ASN  | HN  | 6   | 390900     |
| 100 THR |     |     |      |     |     |            |
|         | HN  | 100 | THR  | HA  | 3.3 | 2516000    |
|         | HN  | 100 | THR  | HB  | 3.9 | 934000     |
|         | HN  | 100 | THR  | QG2 | 3.6 | 1520000    |
|         | HN  | 101 | THR  | HN  | 4.4 | 421100     |
|         | HN  | 102 | HIS  | HE1 | 7   | 85270      |
|         | HA  | 101 | THR  | HN  | 3.1 | 3698000    |
|         | HA  | 102 | HIS  | HN  | 4.1 | 2003000    |
| 101 THR |     |     |      |     |     |            |
|         | HN  | 101 | THR  | HA  | 3.7 | 1243000    |

|         |      |     |     |      |     |             |
|---------|------|-----|-----|------|-----|-------------|
|         | HN   | 101 | THR | HB   | 4   | 810800      |
|         | HN   | 101 | THR | QG2  | 3.6 | 1537000     |
|         | HN   | 102 | HIS | HN   | 4.4 | 410900      |
|         | HN   | 102 | HIS | HA   | 5.4 | 130500      |
|         | HN   | 102 | HIS | HB2  | 5   | 203800      |
|         | HA   | 102 | HIS | HN   | 3.6 | 1495000     |
|         | QG2  | 102 | HIS | HN   | 4.6 | 845600      |
| 102 HIS |      |     |     |      |     |             |
|         | HN   | 102 | HIS | HA   | 3.6 | 1403000     |
|         | HN   | 102 | HIS | HB2  | 4.3 | 531300      |
|         | HN   | 102 | HIS | HB3  | 4.1 | 641600      |
|         | HN   | 102 | HIS | HD2  | 5.8 | 57280       |
|         | HN   | 102 | HIS | HE1  | 5.1 | 124500      |
|         | HA   | 103 | SER | HN   | 3.9 | 945600      |
| 103 SER |      |     |     |      |     |             |
|         | HN   | 103 | SER | HB2  | 4.8 | 254200      |
|         | HN   | 104 | GLY | HN   | 5.5 | 107900      |
|         | HN   | 104 | GLY | HA1  | 5.2 | 163000      |
|         | HN   | 104 | GLY | HA2  | 4.9 | 227800      |
| 104 GLY |      |     |     |      |     |             |
|         | HN   | 106 | THR | HN   | 6.8 | 100400      |
|         | HA1  | 105 | GLY | HN   | 3.4 | 2015000     |
|         | HA1  | 106 | THR | HN   | 6.1 | 198400      |
|         | HA2  | 105 | GLY | HN   | 3.4 | 2089000     |
|         | HA2  | 106 | THR | HN   | 6.1 | 199300      |
| 105 GLY |      |     |     |      |     |             |
|         | HN   | 105 | GLY | QA   | 3.7 | 1347500.0*2 |
|         | HN   | 106 | THR | HN   | 5.3 | 139400      |
|         | QA   | 106 | THR | HN   | 4.5 | 1769500.0*2 |
| 106 THR |      |     |     |      |     |             |
|         | HN   | 106 | THR | HB   | 4.2 | 563100      |
|         | HN   | 106 | THR | QG2  | 4.9 | 250500      |
|         | HN   | 107 | ASN | HN   | 5.3 | 147400      |
|         | HN   | 107 | ASN | HA   | 4.5 | 358300      |
|         | HN   | 108 | LEU | HN   | 6.1 | 189400      |
|         | HN   | 136 | TYR | HH   | 7   | 58740       |
|         | HA   | 107 | ASN | HN   | 3.6 | 1524000     |
|         | QG2  | 107 | ASN | HN   | 5.7 | 368500      |
|         | QG2  | 111 | THR | HN   | 7.2 | 142300      |
| 107 ASN |      |     |     |      |     |             |
|         | HN   | 107 | ASN | HA   | 3.7 | 1172000     |
|         | HN   | 107 | ASN | HD21 | 5.6 | 71520       |
|         | HN   | 108 | LEU | HA   | 5.8 | 81290       |
|         | HN   | 110 | LEU | HA   | 7   | 71000       |
|         | HN   | 110 | LEU | HB2  | 7   | 2067        |
|         | HN   | 110 | LEU | HG   | 7   | 16770       |
|         | HA   | 107 | ASN | HD21 | 4.4 | 324700      |
|         | HA   | 107 | ASN | HD22 | 4.6 | 229800      |
|         | HA   | 108 | LEU | HN   | 3.6 | 1438000     |
|         | HA   | 109 | PHE | HN   | 5.6 | 330200      |
|         | HA   | 110 | LEU | HN   | 5.4 | 408700      |
|         | HA   | 111 | THR | HN   | 6   | 214700      |
|         | QB   | 107 | ASN | HD21 | 5.8 | 187250.0*2  |
|         | QB   | 107 | ASN | HD22 | 6   | 137250.0*2  |
|         | QB   | 108 | LEU | HN   | 6.8 | 79600.0*2   |
|         | HD21 | 108 | LEU | HG   | 7   | 4300        |
|         | HD22 | 108 | LEU | HN   | 7   | 55620       |
|         | HD22 | 108 | LEU | HG   | 7   | 142600      |
|         | HD22 | 141 | ILE | QD1  | 8   | 39640       |
| 108 LEU |      |     |     |      |     |             |
|         | HN   | 108 | LEU | HA   | 4.6 | 342900      |
|         | HN   | 108 | LEU | HB2  | 4.2 | 590700      |
|         | HN   | 108 | LEU | HB3  | 4.3 | 532400      |
|         | HN   | 108 | LEU | HG   | 5.3 | 104200      |
|         | HN   | 108 | LEU | QD1  | 6.4 | 52360       |
|         | HN   | 108 | LEU | QD2  | 6.5 | 45300       |
|         | HN   | 109 | PHE | HN   | 4.4 | 422000      |
|         | HB2  | 109 | PHE | HN   | 4.1 | 628900      |
|         | HB2  | 110 | LEU | HN   | 6.2 | 174200      |
|         | HB3  | 109 | PHE | HN   | 4   | 759100      |
|         | HB3  | 110 | LEU | HN   | 5.4 | 383500      |
|         | HG   | 109 | PHE | HN   | 6.4 | 282200      |
|         | QD1  | 109 | PHE | HN   | 7.8 | 103500      |
| 109 PHE |      |     |     |      |     |             |
|         | HN   | 109 | PHE | HA   | 4.1 | 677600      |
|         | HN   | 109 | PHE | HB2  | 3.7 | 1239000     |
|         | HN   | 109 | PHE | HB3  | 3.8 | 1075000     |

|          |     |     |      |      |     |            |         |      |     |     |      |     |            |
|----------|-----|-----|------|------|-----|------------|---------|------|-----|-----|------|-----|------------|
|          | HN  | 109 | PHE  | CG   | 7.3 | 100450.0*2 |         | HN   | 116 | ILE | HB   | 3.7 | 1271000    |
|          | HN  | 110 | LEU  | HN   | 3   | 4207000    |         | HN   | 116 | ILE | QG2  | 4.2 | 650700     |
|          | HN  | 111 | THR  | HB   | 6.7 | 111000     |         | HN   | 116 | ILE | HG12 | 4.3 | 371000     |
|          | HA  | 110 | LEU  | HN   | 4   | 798100     |         | HN   | 116 | ILE | HG13 | 4.3 | 373000     |
|          | HA  | 113 | VAL  | HN   | 4.8 | 844600     |         | HN   | 116 | ILE | QD1  | 6.1 | 69820      |
|          | HB2 | 110 | LEU  | HN   | 4.1 | 632200     |         | HN   | 117 | GLY | HN   | 3.8 | 1002000    |
|          | HB3 | 110 | LEU  | HN   | 3.9 | 933300     |         | HN   | 118 | HIS | HN   | 7   | 47130      |
| 110 LEU  |     |     |      |      |     |            |         | HA   | 117 | GLY | HN   | 5.1 | 173500     |
|          | HN  | 110 | LEU  | HA   | 3.6 | 1444000    |         | HB   | 117 | GLY | HN   | 4.2 | 600900     |
|          | HN  | 110 | LEU  | HB2  | 3.6 | 1415000    |         | HB   | 118 | HIS | HN   | 5.7 | 285900     |
|          | HN  | 110 | LEU  | HB3  | 3.7 | 1227000    |         | QG2  | 117 | GLY | HN   | 6   | 301300     |
|          | HN  | 110 | LEU  | HG   | 4.4 | 322200     |         | QG2  | 119 | SER | HN   | 7   | 157200     |
|          | HN  | 110 | LEU  | QD1  | 6.6 | 42470      |         | HG12 | 117 | GLY | HN   | 6.7 | 228000     |
|          | HN  | 111 | THR  | HN   | 3.9 | 840400     | 117 GLY |      |     |     |      |     |            |
|          | HN  | 111 | THR  | HB   | 4.9 | 225900     |         | HN   | 117 | GLY | HA1  | 3.6 | 1594000    |
|          | HN  | 112 | ALA  | HN   | 5.1 | 583700     |         | HN   | 117 | GLY | HA2  | 3.9 | 959000     |
|          | HN  | 113 | VAL  | QG2  | 8   | 20650      |         | HN   | 118 | HIS | HN   | 3.8 | 980900     |
|          | HN  | 114 | HIS  | HN   | 7   | 76580      |         | HA1  | 118 | HIS | HN   | 3.6 | 1418000    |
|          | HA  | 111 | THR  | HN   | 4.7 | 289100     |         | HA1  | 119 | SER | HN   | 5   | 661100     |
|          | HB2 | 111 | THR  | HN   | 4   | 787700     |         | HA2  | 118 | HIS | HN   | 3.9 | 894100     |
|          | HB3 | 111 | THR  | HN   | 4   | 731900     | 118 HIS |      |     |     |      |     |            |
|          | HG  | 113 | VAL  | HN   | 7   | 160300     |         | HN   | 118 | HIS | HA   | 4.2 | 545600     |
| 111 THR  |     |     |      |      |     |            |         | HN   | 118 | HIS | HB2  | 3.7 | 1159000    |
|          | HN  | 111 | THR  | HA   | 3.4 | 1938000    |         | HN   | 118 | HIS | HB3  | 3.9 | 888300     |
|          | HN  | 111 | THR  | HB   | 3.2 | 3225000    |         | HN   | 118 | HIS | HD2  | 4.5 | 285800     |
|          | HN  | 111 | THR  | QG2  | 4.3 | 543900     |         | HN   | 118 | HIS | HE1  | 6.5 | 29540      |
|          | HN  | 112 | ALA  | HN   | 3.8 | 1092000    |         | HN   | 119 | SER | HN   | 3.8 | 1061000    |
|          | HN  | 112 | ALA  | QB   | 5.3 | 111300     |         | HN   | 119 | SER | QB   | 6.2 | 167000.0*2 |
|          | HN  | 113 | VAL  | HN   | 7   | 47960      |         | HN   | 120 | LEU | QD1  | 7.5 | 120800     |
|          | HN  | 114 | HIS  | HN   | 5.3 | 441700     |         | HN   | 132 | MET | QE   | 5.7 | 355200     |
|          | HB  | 112 | ALA  | HN   | 3.9 | 941000     |         | HB2  | 119 | SER | HN   | 4.2 | 601500     |
|          | HB  | 113 | VAL  | HN   | 5.7 | 300600     |         | HB3  | 119 | SER | HN   | 4.2 | 599400     |
|          | QG2 | 112 | ALA  | HN   | 6.7 | 194100     | 119 SER |      |     |     |      |     |            |
| 112 ALA  |     |     |      |      |     |            |         | HN   | 119 | SER | HA   | 3.8 | 1141000    |
|          | HN  | 112 | ALA  | HA   | 4.1 | 655700     |         | HN   | 119 | SER | QB   | 5.2 | 315350.0*2 |
|          | HN  | 112 | ALA  | QB   | 3.3 | 1899000    |         | HN   | 120 | LEU | HN   | 4.1 | 700100     |
|          | HN  | 113 | VAL  | HN   | 4.1 | 663300     |         | HN   | 120 | LEU | QB   | 7.3 | 51550.0*2  |
|          | HN  | 113 | VAL  | HB   | 6.2 | 52550      |         | HN   | 121 | GLY | HN   | 5.4 | 404600     |
|          | HN  | 114 | HIS  | HN   | 6.9 | 92450      |         | HN   | 122 | LEU | HN   | 6.2 | 180100     |
|          | HN  | 115 | GLU- | HN   | 7   | 58160      |         | HA   | 120 | LEU | HN   | 4.3 | 522200     |
|          | HN  | 116 | ILE  | HG13 | 7   | 39030      | 120 LEU |      |     |     |      |     |            |
|          | HN  | 116 | ILE  | QD1  | 8   | 19550      |         | HN   | 120 | LEU | HA   | 3.9 | 899500     |
|          | HA  | 113 | VAL  | HN   | 4.6 | 341700     |         | HN   | 120 | LEU | QB   | 4.7 | 653500.0*2 |
|          | QB  | 115 | GLU- | HN   | 5.8 | 171500     |         | HN   | 120 | LEU | HG   | 3.7 | 826800     |
| 113 VAL  |     |     |      |      |     |            |         | HN   | 120 | LEU | QD1  | 4   | 815000     |
|          | HN  | 113 | VAL  | HA   | 3.8 | 1142000    |         | HN   | 120 | LEU | QD2  | 4.8 | 280400     |
|          | HN  | 113 | VAL  | HB   | 3.6 | 1584000    |         | HN   | 121 | GLY | HN   | 3.3 | 2580000    |
|          | HN  | 113 | VAL  | QG1  | 3.7 | 1515000    |         | HA   | 121 | GLY | HN   | 3.8 | 1132000    |
|          | HN  | 113 | VAL  | QG2  | 4.4 | 464000     |         | HG   | 121 | GLY | HN   | 6.4 | 288900     |
|          | HN  | 114 | HIS  | HN   | 3.9 | 932100     | 121 GLY |      |     |     |      |     |            |
|          | HN  | 115 | GLU- | HN   | 5.7 | 300500     |         | HN   | 121 | GLY | HA1  | 3.6 | 1519000    |
|          | HN  | 116 | ILE  | HN   | 5.1 | 576900     |         | HN   | 121 | GLY | HA2  | 3.6 | 1451000    |
|          | HA  | 116 | ILE  | HN   | 5.6 | 315900     |         | HN   | 122 | LEU | HN   | 3.2 | 2994000    |
|          | HB  | 114 | HIS  | HN   | 3.6 | 1387000    |         | HN   | 122 | LEU | HA   | 4.9 | 231500     |
|          | QG1 | 114 | HIS  | HN   | 5.3 | 512400     |         | HN   | 122 | LEU | QB   | 7   | 65000.0*2  |
|          | QG2 | 114 | HIS  | HN   | 6.1 | 272300     |         | HN   | 122 | LEU | HG   | 6.4 | 284000     |
| 114 HIS  |     |     |      |      |     |            |         | HN   | 122 | LEU | QD1  | 6.5 | 216900     |
|          | HN  | 114 | HIS  | HA   | 3.9 | 905600     |         | HA1  | 122 | LEU | HN   | 3.9 | 890600     |
|          | HN  | 114 | HIS  | HB2  | 3.4 | 1985000    |         | HA2  | 122 | LEU | HN   | 4   | 760500     |
|          | HN  | 114 | HIS  | HB3  | 3.6 | 1559000    | 122 LEU |      |     |     |      |     |            |
|          | HN  | 115 | GLU- | HN   | 3.9 | 840900     |         | HN   | 122 | LEU | HA   | 3.7 | 1195000    |
|          | HN  | 131 | VAL  | QG2  | 4.8 | 738900     |         | HN   | 122 | LEU | QB   | 5.1 | 377800.0*2 |
|          | HA  | 115 | GLU- | HN   | 5   | 199700     |         | HN   | 122 | LEU | HG   | 3.8 | 706400     |
|          | HA  | 117 | GLY  | HN   | 5.9 | 227900     |         | HN   | 122 | LEU | QD1  | 4   | 843900     |
|          | HA  | 118 | HIS  | HN   | 6.4 | 147200     |         | QB   | 124 | HIS | HN   | 8   | 10095.0*2  |
|          | HB2 | 115 | GLU- | HN   | 4.1 | 718800     |         | QD2  | 124 | HIS | HN   | 8   | 55760      |
|          | HB3 | 115 | GLU- | HN   | 4.3 | 513400     | 123 GLY |      |     |     |      |     |            |
|          | HD2 | 115 | GLU- | HN   | 7   | 37140      |         | HA1  | 124 | HIS | HN   | 3.7 | 1225000    |
| 115 GLU- |     |     |      |      |     |            |         | HA2  | 124 | HIS | HN   | 3.7 | 1217000    |
|          | HN  | 115 | GLU- | HA   | 3.5 | 1651000    | 124 HIS |      |     |     |      |     |            |
|          | HN  | 115 | GLU- | QB   | 4.7 | 654000.0*2 |         | HN   | 124 | HIS | HA   | 3.1 | 3611000    |
|          | HN  | 115 | GLU- | QG   | 5.2 | 402650.0*2 |         | HN   | 124 | HIS | HB2  | 4.6 | 342900     |
|          | HN  | 116 | ILE  | QG2  | 8   | 82410      |         | HN   | 124 | HIS | HB3  | 4.8 | 258000     |
|          | HA  | 116 | ILE  | HN   | 4.4 | 411800     |         | HN   | 124 | HIS | HD2  | 4.2 | 406200     |
|          | QB  | 117 | GLY  | HN   | 8   | 9890.0*2   |         | HN   | 124 | HIS | HE1  | 5.4 | 92900      |
| 116 ILE  |     |     |      |      |     |            |         | HN   | 125 | SER | HN   | 5.3 | 147200     |
|          | HN  | 116 | ILE  | HA   | 4.8 | 254700     | 125 SER |      |     |     |      |     |            |





|          |     |     |      |      |     |         |
|----------|-----|-----|------|------|-----|---------|
|          | QG2 | 142 | ASN  | HN   | 6   | 304000  |
| 142 ASN  |     |     |      |      |     |         |
|          | HN  | 142 | ASN  | HA   | 3.3 | 2539000 |
|          | HN  | 142 | ASN  | HB2  | 3.8 | 1008000 |
|          | HN  | 142 | ASN  | HB3  | 3.7 | 1156000 |
|          | HN  | 143 | THR  | HN   | 3.7 | 1327000 |
|          | HN  | 144 | PHE  | HN   | 6.1 | 196800  |
|          | HA  | 143 | THR  | HN   | 3.6 | 1468000 |
|          | HA  | 144 | PHE  | HN   | 5.1 | 535200  |
| 143 THR  |     |     |      |      |     |         |
|          | HN  | 143 | THR  | HA   | 3.6 | 1526000 |
|          | HN  | 143 | THR  | QG2  | 4.3 | 545900  |
|          | HN  | 144 | PHE  | HN   | 3.5 | 1849000 |
|          | HN  | 144 | PHE  | HB2  | 4.9 | 232500  |
|          | HN  | 144 | PHE  | HB3  | 4.9 | 230600  |
|          | HN  | 145 | ARG+ | HN   | 6.3 | 155300  |
|          | HA  | 144 | PHE  | HN   | 4   | 747300  |
|          | HB  | 144 | PHE  | HN   | 4.3 | 533200  |
|          | QG2 | 144 | PHE  | HN   | 6.7 | 192600  |
| 144 PHE  |     |     |      |      |     |         |
|          | HN  | 144 | PHE  | HA   | 3.8 | 1003000 |
|          | HN  | 144 | PHE  | HB2  | 3.9 | 907000  |
|          | HN  | 144 | PHE  | HB3  | 3.6 | 1396000 |
|          | HA  | 145 | ARG+ | HN   | 3.5 | 1699000 |
| 145 ARG+ |     |     |      |      |     |         |
|          | HN  | 145 | ARG+ | HA   | 3.1 | 3959000 |
|          | HN  | 145 | ARG+ | HB2  | 4.4 | 460700  |
|          | HN  | 145 | ARG+ | HB3  | 3.9 | 861400  |
|          | HN  | 145 | ARG+ | HG2  | 4.7 | 206900  |
|          | HN  | 145 | ARG+ | HG3  | 4.7 | 205000  |
|          | HN  | 145 | ARG+ | HD2  | 5   | 143200  |
|          | HN  | 145 | ARG+ | HD3  | 5.1 | 124900  |
|          | HN  | 146 | LEU  | HN   | 4.6 | 353600  |
|          | HA  | 146 | LEU  | HN   | 3.7 | 1307000 |
|          | HB2 | 146 | LEU  | HN   | 3.7 | 1282000 |
|          | HB3 | 146 | LEU  | HN   | 4   | 836400  |
|          | HD2 | 146 | LEU  | HN   | 7   | 71090   |
|          | HD2 | 147 | SER  | HN   | 5.6 | 547700  |
|          | HD3 | 146 | LEU  | HN   | 7   | 142800  |
| 146 LEU  |     |     |      |      |     |         |
|          | HN  | 146 | LEU  | HA   | 3.3 | 2521000 |
|          | HN  | 146 | LEU  | HB2  | 3.7 | 1208000 |
|          | HN  | 146 | LEU  | HB3  | 3.4 | 2276000 |
|          | HN  | 146 | LEU  | HG   | 4   | 576000  |
|          | HN  | 146 | LEU  | QD1  | 5.1 | 196100  |
|          | HN  | 146 | LEU  | QD2  | 4.3 | 540500  |
|          | HN  | 147 | SER  | HN   | 5.4 | 130700  |
|          | HB2 | 147 | SER  | HN   | 4.2 | 611600  |
|          | HB2 | 150 | ASP- | HN   | 5.8 | 258400  |
|          | QD1 | 154 | ILE  | HN   | 8   | 75800   |
|          | QD2 | 147 | SER  | HN   | 5.3 | 498900  |
|          | QD2 | 151 | ILE  | HN   | 8   | 20690   |
| 147 SER  |     |     |      |      |     |         |
|          | HN  | 147 | SER  | HA   | 3.3 | 2385000 |
|          | HN  | 147 | SER  | HB2  | 4.1 | 674000  |
|          | HN  | 147 | SER  | HB3  | 3.5 | 1898000 |
|          | HN  | 150 | ASP- | HN   | 5.5 | 354800  |
|          | HN  | 151 | ILE  | HN   | 6.4 | 143500  |
|          | HA  | 148 | ALA  | HN   | 2.9 | 4972000 |
| 148 ALA  |     |     |      |      |     |         |
|          | HN  | 148 | ALA  | HA   | 4.2 | 563200  |
|          | HN  | 148 | ALA  | QB   | 3.7 | 992800  |
|          | HA  | 151 | ILE  | HN   | 5.2 | 509800  |
|          | QB  | 149 | ASP- | HN   | 4.6 | 273000  |
| 149 ASP- |     |     |      |      |     |         |
|          | HN  | 149 | ASP- | HA   | 4.7 | 282100  |
|          | HN  | 149 | ASP- | HB2  | 4.9 | 231100  |
|          | HN  | 149 | ASP- | HB3  | 5.1 | 175700  |
|          | HN  | 150 | ASP- | HN   | 5.2 | 154000  |
|          | HA  | 150 | ASP- | HN   | 4.8 | 272900  |
|          | HB3 | 150 | ASP- | HN   | 4.3 | 508600  |
| 150 ASP- |     |     |      |      |     |         |
|          | HN  | 150 | ASP- | HA   | 3.5 | 1709000 |
|          | HN  | 150 | ASP- | HB2  | 3.9 | 911100  |
|          | HN  | 150 | ASP- | HB3  | 3.9 | 974400  |
|          | HN  | 151 | ILE  | HN   | 3.7 | 1254000 |
|          | HN  | 151 | ILE  | HG12 | 5.6 | 581300  |

|          |     |     |      |      |     |            |
|----------|-----|-----|------|------|-----|------------|
|          | HN  | 152 | ARG+ | HN   | 5.5 | 368700     |
|          | HA  | 153 | GLY  | HN   | 6.4 | 147200     |
|          | HB2 | 151 | ILE  | HN   | 4.1 | 680600     |
|          | HB3 | 151 | ILE  | HN   | 4.4 | 443800     |
| 151 ILE  |     |     |      |      |     |            |
|          | HN  | 151 | ILE  | HA   | 4.2 | 568700     |
|          | HN  | 151 | ILE  | HB   | 3.6 | 1580000    |
|          | HN  | 151 | ILE  | QG2  | 4.4 | 465600     |
|          | HN  | 151 | ILE  | HG12 | 3.7 | 864700     |
|          | HN  | 151 | ILE  | HG13 | 4   | 549200     |
|          | HN  | 151 | ILE  | QD1  | 4.4 | 465500     |
|          | HN  | 152 | ARG+ | HN   | 3.7 | 1176000    |
|          | HA  | 154 | ILE  | HN   | 4.8 | 820900     |
|          | HA  | 155 | GLN  | HN   | 4.9 | 749100     |
|          | QG2 | 152 | ARG+ | HN   | 4.5 | 976900     |
|          | QG2 | 155 | GLN  | HN   | 5.8 | 348100     |
|          | QD1 | 153 | GLY  | HN   | 8   | 75100      |
| 152 ARG+ |     |     |      |      |     |            |
|          | HN  | 152 | ARG+ | HA   | 3.6 | 1420000    |
|          | HN  | 152 | ARG+ | HB2  | 3.9 | 846900     |
|          | HN  | 152 | ARG+ | HG2  | 3.9 | 596000     |
|          | HN  | 152 | ARG+ | HG3  | 3.9 | 653300     |
|          | HN  | 152 | ARG+ | QD   | 6.8 | 59050.0*2  |
|          | HB2 | 153 | GLY  | HN   | 3.9 | 958000     |
| 153 GLY  |     |     |      |      |     |            |
|          | HN  | 153 | GLY  | HA1  | 3.4 | 2227000    |
|          | HN  | 153 | GLY  | HA2  | 3.3 | 2332000    |
|          | HN  | 155 | GLN  | HN   | 4.4 | 1456000    |
|          | HA1 | 154 | ILE  | HN   | 4.1 | 709700     |
| 154 ILE  |     |     |      |      |     |            |
|          | HN  | 154 | ILE  | HA   | 3.6 | 1428000    |
|          | HN  | 154 | ILE  | HB   | 3.6 | 1511000    |
|          | HN  | 154 | ILE  | QG2  | 3.6 | 1691000    |
|          | HN  | 154 | ILE  | QD1  | 4.9 | 252300     |
|          | HA  | 157 | LEU  | HN   | 4.8 | 818000     |
|          | QG2 | 155 | GLN  | HN   | 4.8 | 724000     |
| 155 GLN  |     |     |      |      |     |            |
|          | HN  | 155 | GLN  | HA   | 3.6 | 1497000    |
|          | HN  | 155 | GLN  | HB2  | 3.3 | 2434000    |
|          | HN  | 155 | GLN  | HB3  | 3.6 | 1513000    |
|          | HN  | 155 | GLN  | HG2  | 3.6 | 985000     |
|          | HN  | 155 | GLN  | HG3  | 3.6 | 965500     |
|          | HN  | 156 | SER  | HN   | 3.5 | 1767000    |
|          | HN  | 157 | LEU  | HN   | 5.9 | 230300     |
|          | HG2 | 155 | GLN  | HE21 | 4.3 | 369600     |
|          | HG2 | 155 | GLN  | HE22 | 3.8 | 751700     |
|          | HG3 | 155 | GLN  | HE21 | 4.4 | 326300     |
|          | HG3 | 155 | GLN  | HE22 | 3.8 | 713500     |
| 156 SER  |     |     |      |      |     |            |
|          | HN  | 156 | SER  | HA   | 3.5 | 1627000    |
|          | HN  | 156 | SER  | HB3  | 3.5 | 1682000    |
|          | HN  | 157 | LEU  | HN   | 3.2 | 2770000    |
| 157 LEU  |     |     |      |      |     |            |
|          | HN  | 157 | LEU  | HA   | 3.5 | 1619000    |
|          | HN  | 157 | LEU  | HB2  | 3.6 | 1576000    |
|          | HN  | 157 | LEU  | HB3  | 3.6 | 1533000    |
|          | HN  | 157 | LEU  | HG   | 3.4 | 1402000    |
|          | HN  | 157 | LEU  | QD1  | 3.9 | 991200     |
|          | HN  | 158 | TYR  | HN   | 4.1 | 699100     |
| 158 TYR  |     |     |      |      |     |            |
|          | HN  | 158 | TYR  | CG   | 7.1 | 122050.0*2 |

The nomenclature of the atoms is that used by the program DYANA. The reported volumes of cross-peaks involving pseudoatoms correspond to the measured volumes divided by number of atoms represented by the pseudoatoms (a symbol \*2 or \*4 is present in these cases).
