# Supplementary material
Source: PubMed Central journal article supplement (PMC556229)
Supplement: pnas_102_15_5334__10.pdf [file pnas_102_15_5334__10.pdf]

**Table 9. Statistical analysis of the energy minimized family of conformers and of the mean structure of MMP12-NNGH adduct**

|                                                                        | REM<br>(20 structures) | <REM><br>(mean) |
|------------------------------------------------------------------------|------------------------|-----------------|
| <b>RMS violations per meaningful distance constraint, Å*</b>           |                        |                 |
| Intraresidue (426)                                                     | 0.0229 ± 0.0027        | 0.0239          |
| Sequential (778)                                                       | 0.0079 ± 0.0011        | 0.0089          |
| Medium range (672) <sup>†</sup>                                        | 0.0086 ± 0.0011        | 0.0097          |
| Long range (765)                                                       | 0.0119 ± 0.0013        | 0.0099          |
| Total (2,641)                                                          | 0.0128 ± 0.0008        | 0.0129          |
| NOEs per residue                                                       | 16.6                   | 16.6            |
| <b>RMS violations per meaningful dihedral angle constraints (deg)*</b> |                        |                 |
| Phi (81)                                                               | 1.14 ± 0.32            | 0.91            |
| Psi (86)                                                               | 0.64 ± 0.33            | 1.46            |
| <b>Average no. of violations per structure</b>                         |                        |                 |
| Intraresidue                                                           | 15.2 ± 1.7             | 15              |
| Sequential                                                             | 10.9 ± 2.2             | 17              |
| Medium range                                                           | 10.5 ± 2.7             | 13              |
| Long range                                                             | 13.6 ± 2.1             | 10              |
| Total (meaningful NOEs)                                                | 50.2 ± 4.2             | 55              |
| Phi                                                                    | 4.2 ± 1.3              | 4               |
| Psi                                                                    | 1.4 ± 0.8              | 1               |
| Average no. of NOE violations larger than 0.3 Å                        | 0.85 ± 0.36            | 1               |
| Average no. of NOE violations between 0.1 and 0.3 Å                    | 8.2 ± 1.8              | 5               |
| <b>RMSD to the mean structure (Å) (BB)<sup>‡</sup></b>                 | 0.74 ± 0.10            | -               |
| <b>RMSD to the mean structure (Å) (HA)<sup>‡</sup></b>                 | 1.23 ± 0.11            | -               |
| <b>Target function (Å<sup>2</sup>)</b>                                 | 1.07 ± 0.10            | -               |
| <b>Structural analysis<sup>§</sup></b>                                 |                        |                 |
| % of residues in most favorable regions                                | 85.2 ± 1.6             | 87.8            |
| % of residues in allowed regions                                       | 13.4 ± 1.4             | 9.8             |
| % of residues in generously allowed regions                            | 1.0 ± 0.8              | 1.6             |
| % of residues in disallowed regions                                    | 0.5 ± 0.6              | 0.8             |
| Bad contact / 100 residues                                             | 0.55 ± 0.83            | 1               |
| H-bond energy standard deviation (ref. 1)                              | 0.82 ± 0.04            | 0.84            |
| Overall G factor                                                       | -0.31 ± 0.03           | -0.29           |

REM and <REM> indicate the energy minimized family of 20 structures and the energy minimized mean structure, respectively.

\*The number of meaningful constraints for each class is reported in parenthesis.

<sup>†</sup>Medium-range distance constraints are those between residues (i,i+2), (i,i+3), (i,i+4), and (i,i+5).

<sup>‡</sup>The RMSD to the mean structure for residues 113-259.

<sup>§</sup>The results from the Ramachandran plot analysis for residues 113-259, which are connected to the range of RMSD calculated.

1. Morris, A. L., MacArthur, M. W., Hutchinson, E. G. & Thornton, J. M. (1992) *Proteins Struct. Funct. Genet.* **12**, 345-364.
