# Supplementary material
Source: PubMed Central journal article supplement (PMC556229)
Supplement: pnas_102_15_5334__14.pdf [file pnas_102_15_5334__14.pdf]

**Table 10.** Chemical exchange parameters from  $R_2$ -CPMG and  $R_{1\rho}^{OFF}$ 

| Residue number | $\tau_{\text{ex}}$ ( $\mu\text{s}$ ) from $R_2$ -CPMG | $\tau_{\text{ex}}$ ( $\mu\text{s}$ ) from $R_{1\rho}^{OFF}$ |
|----------------|-------------------------------------------------------|-------------------------------------------------------------|
| F138           |                                                       | $79 \pm 22$                                                 |
| W141           |                                                       | $52 \pm 6$                                                  |
| S150           |                                                       | $32 \pm 5$                                                  |
| A157           | $159 \pm 34$                                          |                                                             |
| V162           | $164 \pm 17$                                          |                                                             |
| A164           |                                                       | $165 \pm 17$                                                |
| H172           |                                                       | $117 \pm 22$                                                |
| F174           |                                                       | $66 \pm 44$                                                 |
| D175           |                                                       | $131 \pm 21$                                                |
| G178           |                                                       | $137 \pm 3$                                                 |
| I180           |                                                       | $81 \pm 14$                                                 |
| H183           |                                                       | $70 \pm 4$                                                  |
| S189           | $295 \pm 32$                                          |                                                             |
| I191           | $252 \pm 41$                                          |                                                             |
| E201           | $163 \pm 11$                                          |                                                             |
| F202           |                                                       | $59 \pm 16$                                                 |
| W203           |                                                       | $32 \pm 10$                                                 |
| S207           |                                                       | $26 \pm 11$                                                 |
| L224           |                                                       | $60 \pm 36$                                                 |
| K241           |                                                       | $50 \pm 7$                                                  |
