# Supplementary material
Source: PubMed Central journal article supplement (PMC556229)

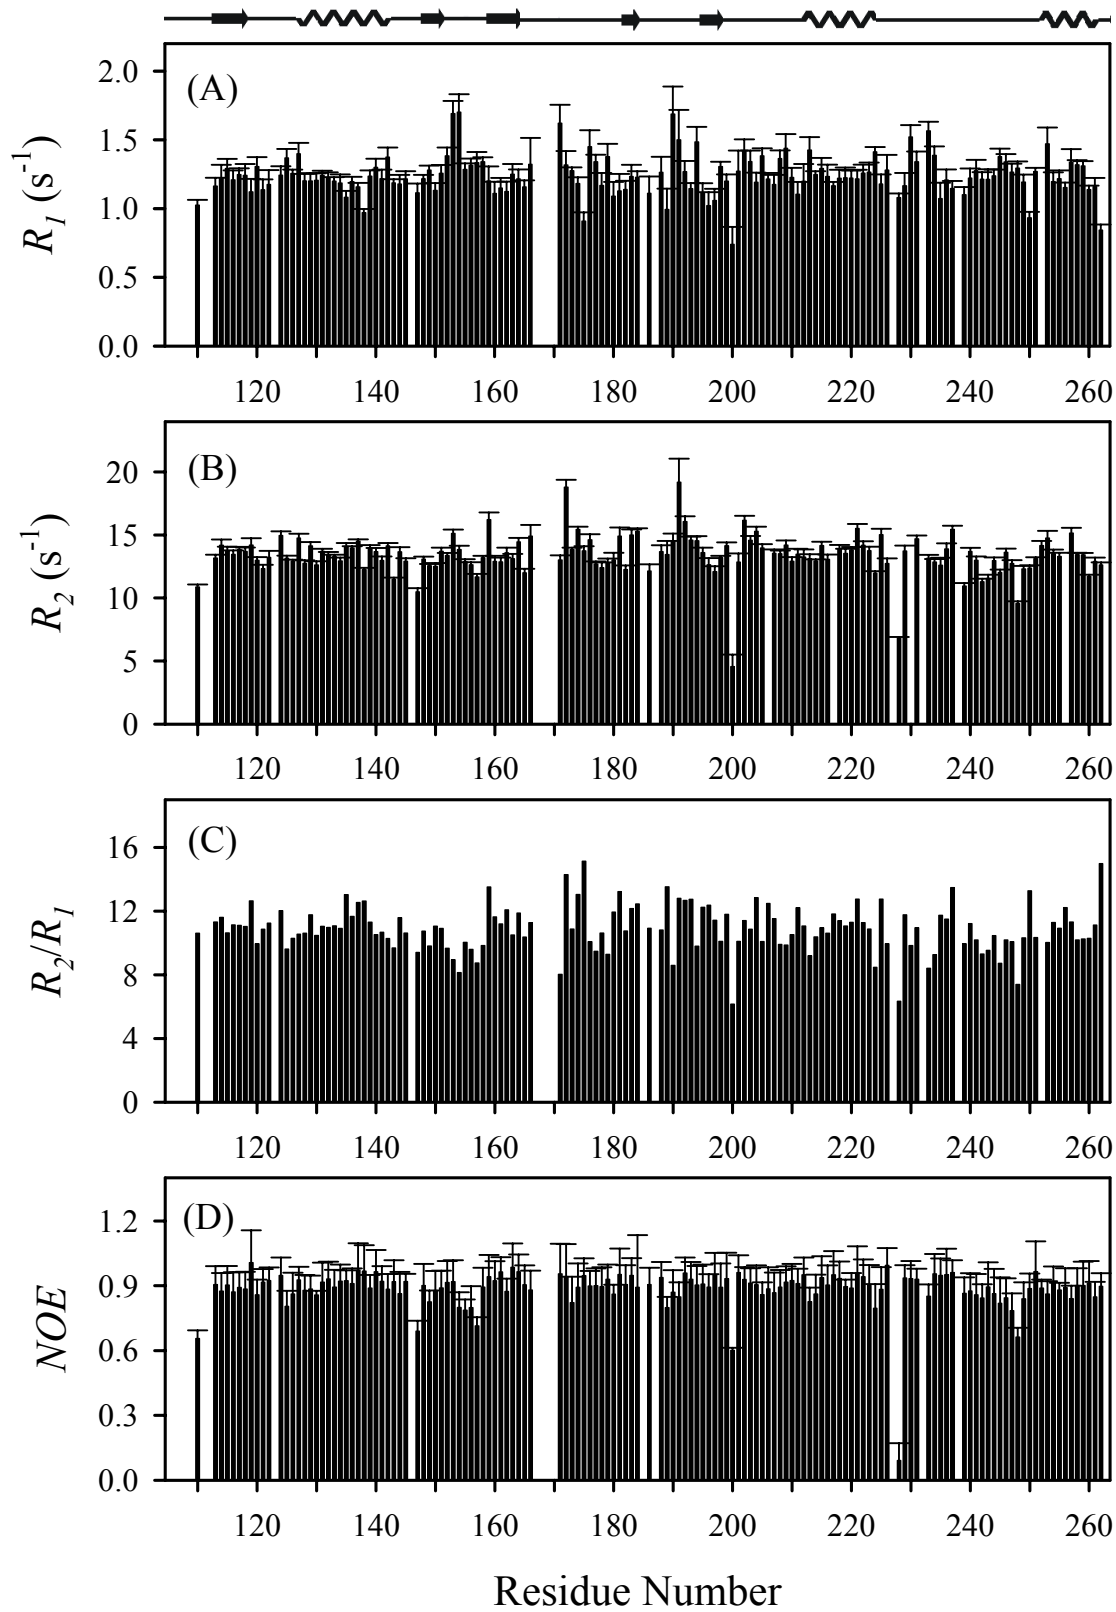

Supplement: pnas_102_15_5334__11.pdf [file pnas_102_15_5334__11.pdf]

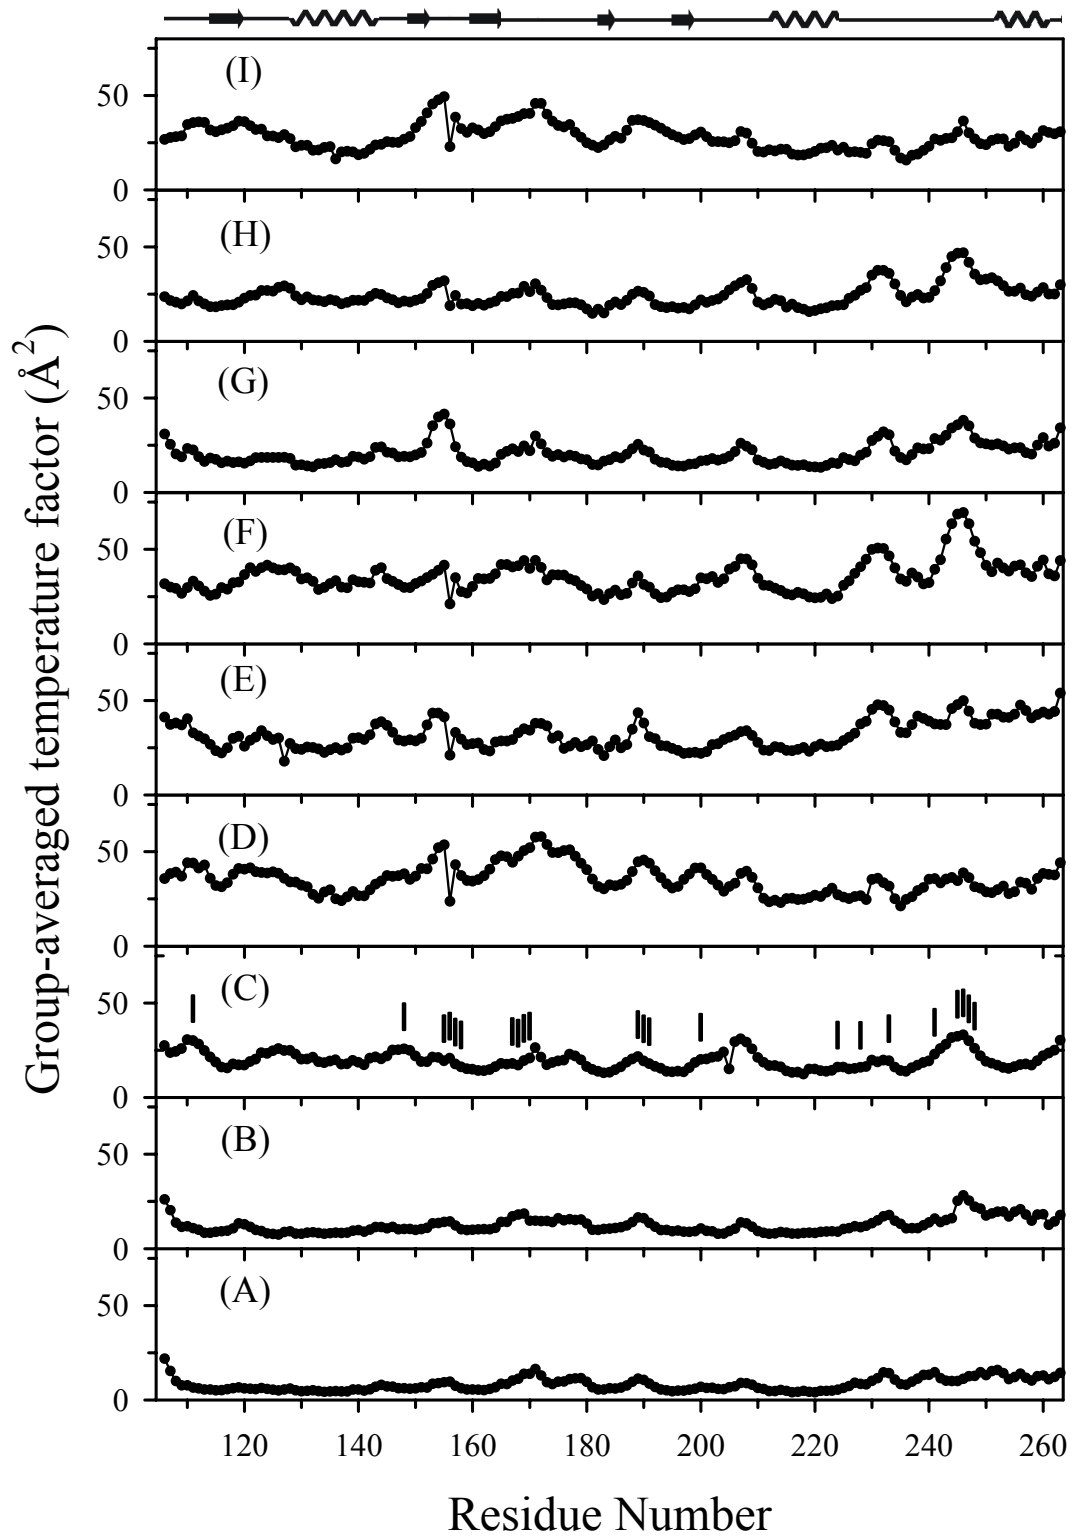

Supplement: pnas_102_15_5334__12.pdf [file pnas_102_15_5334__12.pdf]

# Residue Number

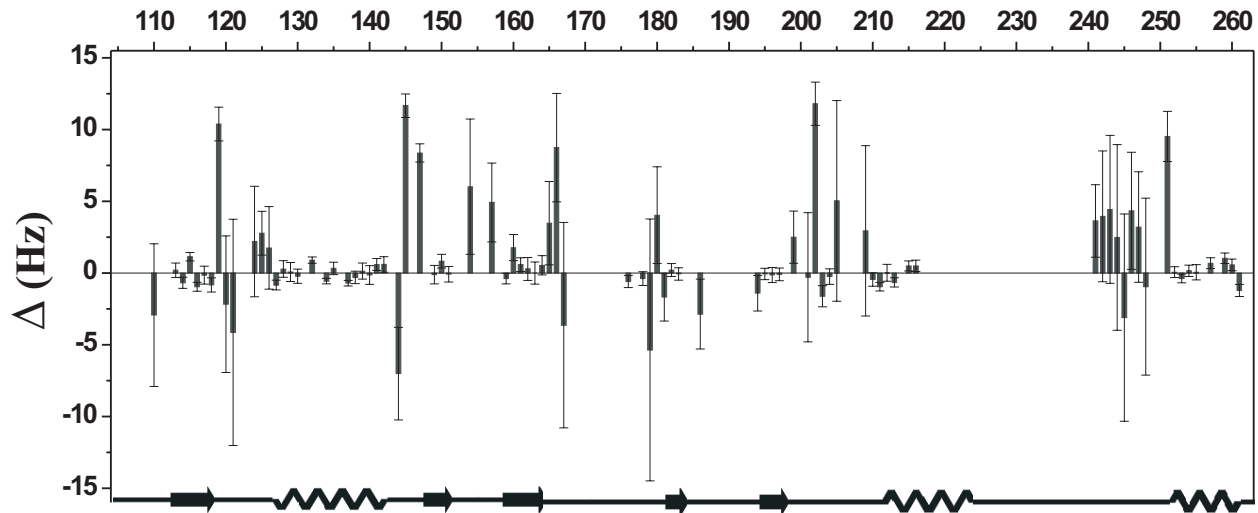

Supplement: pnas_102_15_5334__13.pdf [file pnas_102_15_5334__13.pdf]
